# Supplementary material
Source: publisher site journal article supplement (https://www.dovepress.com/get_supplementary_file.php?f=349694.xlsx)
Supplement: Supplementary file 2 [file get_supplementary_file.php]

## Sheet: Table S1
Table S1. DEmRs in the GSE47460 dataset.
DEG	logFC	AveExpr	P.Value	adj.P.Val
FGG	1.7916	11.0767	1.29229e-08	2.78341e-06
BPIFA1	1.23431	8.14889	0.00234981	0.0186834
MMP1	1.18624	7.73548	4.61933e-07	3.92535e-05
RPS4Y1	1.14071	9.42891	0.0481673	0.161978
ITLN1	1.11405	10.6444	0.00188281	0.0160938
COMP	1.11301	9.55873	1.26897e-09	4.84302e-07
CBLN4	0.97449	7.71568	1.46412e-08	2.97667e-06
BHLHE22	0.915788	8.97211	1.26116e-15	2.74352e-11
C4orf7	0.913673	6.33175	0.000524287	0.00642916
SPP1	0.895235	9.02852	0.000202821	0.00320652
POU2AF1	0.886566	10.7971	1.43298e-06	8.70756e-05
CYP1B1	0.882519	10.2947	1.22331e-13	8.87059e-10
ADCYAP1	0.879048	6.166	4.34882e-05	0.00105703
CR2	0.866963	6.25209	3.21713e-05	0.000845235
CXCL13	0.865337	6.1505	0.000185329	0.0030241
CA3	0.843835	8.57805	7.89168e-09	1.99141e-06
PLA2G2A	0.838247	7.27307	0.000175424	0.00289268
LOC100130232	0.824836	7.68574	3.50816e-09	1.03131e-06
CD19	0.824627	7.99487	4.07881e-06	0.000185629
LOC100653210	0.807413	11.9129	4.78238e-05	0.00112108
DOCK3	0.804561	8.62895	0.000149544	0.00257168
MS4A1	0.798763	6.77776	2.20823e-06	0.0001192
IL13RA2	0.792407	7.11866	3.31464e-07	3.05165e-05
IGLL5	0.790147	15.4527	9.11336e-06	0.00032987
PNOC	0.76634	7.43719	5.01604e-08	7.63069e-06
SERPIND1	0.764366	6.99384	0.000366301	0.00490672
COL10A1	0.763202	8.07697	7.13474e-07	5.37056e-05
CCL19	0.743274	10.2108	5.6887e-05	0.00127317
CHRDL2	0.737455	7.1593	2.73014e-07	2.67529e-05
CLC	0.725826	6.65632	2.81707e-06	0.00014337
LOC401847	0.725593	8.31858	6.20893e-05	0.00135612
C14orf162	0.717557	10.1386	3.57743e-06	0.000168814
LOC100130811	0.716556	6.2175	3.85367e-06	0.000178456
PLA2G7	0.716168	10.0497	1.62405e-05	0.000524179
STEAP1	0.71392	9.14389	1.11783e-08	2.5376e-06
CRLF1	0.711135	10.2445	1.36924e-05	0.000457548
TNFRSF17	0.709435	8.40646	2.90347e-05	0.000789526
MOP-1	0.701407	9.65763	0.000147097	0.0025336
CXCR5	0.686985	5.95692	1.39901e-07	1.63624e-05
TUBB3	0.681381	7.61723	8.20714e-05	0.0016516
FLJ43860	0.676971	7.57215	0.000209412	0.00328447
PROP1	0.67506	6.46247	0.000597928	0.00704414
CHI3L1	0.674153	10.1706	6.27009e-06	0.000252304
SAA1	0.65076	8.64466	0.00844871	0.047847
CTSG	0.645807	10.965	0.00024867	0.00370069
BLK	0.626111	6.59814	3.4471e-05	0.000890597
GREM1	0.618939	5.40639	2.99461e-05	0.000805747
KIAA0125	0.615364	7.09376	6.68554e-06	0.000264913
CCL8	0.614747	8.211	0.000121551	0.00220167
SPIB	0.610148	7.26985	3.85774e-06	0.000178456
AGTR2	0.607753	7.39078	0.000761127	0.00838624
CEACAM8	0.605294	6.07355	0.000644821	0.00744951
MZB1	0.60488	8.43397	3.87535e-06	0.000178456
CRH	0.601931	5.12922	0.000118556	0.00216365
KCTD19	0.600313	11.3899	0.000170463	0.00283722
HS3ST2	0.599417	8.10011	2.46898e-05	0.000706548
HOXC6	0.598777	7.98266	2.48725e-05	0.000708214
LOC100130238	0.59599	11.2431	0.000222508	0.00341598
THBS2	0.590159	9.4801	4.89984e-06	0.000214038
MGC16025	0.58877	7.2355	4.73593e-05	0.00111379
PFKL	0.58681	12.0087	3.21536e-05	0.000845235
AZGP1	0.578933	9.14754	0.000545966	0.00658853
FCRL5	0.57796	6.43092	3.38175e-06	0.000162041
FCRLA	0.577305	5.43872	2.10388e-05	0.000630411
BNC1	0.574824	5.17363	8.22732e-05	0.00165413
IGLL1	0.572101	12.177	1.27924e-06	8.21331e-05
SDS	0.56828	8.11868	0.000832622	0.00892259
ZNF843	0.56641	8.86296	8.51716e-05	0.00169517
WT1-AS	0.566059	5.6375	0.00162762	0.014541
CTHRC1	0.564565	8.98442	0.000123283	0.0022275
CPZ	0.558108	8.85004	2.66736e-06	0.000139485
COL14A1	0.548521	8.9441	4.21177e-06	0.000189303
TMEM130	0.544939	11.3227	1.53504e-05	0.000502153
GAS2	0.544811	6.33027	8.05572e-09	1.99141e-06
CPXM1	0.539629	7.11046	0.000619655	0.0072434
IL8	0.53913	7.44202	0.0152137	0.0732225
FLJ41200	0.536931	4.46259	2.82074e-06	0.00014337
GGT5	0.535874	10.4806	6.26594e-08	9.14828e-06
BDKRB1	0.533686	6.85389	0.00921309	0.0509201
VPREB3	0.533599	7.42528	7.75128e-06	0.000292238
PAPPA	0.528599	8.37923	5.32684e-07	4.35639e-05
HOXC9	0.526099	6.32859	0.000741565	0.00823481
RBAK-LOC389458	0.523907	11.528	0.000104889	0.00198119
S100A9	0.522323	10.0971	1.93675e-06	0.00010748
LTB	0.521626	10.7103	1.02627e-06	6.99859e-05
CCL13	0.521556	9.9072	8.90535e-05	0.00175796
SMR3A	0.519603	7.38991	9.56022e-05	0.00185359
HPR	0.517831	12.5814	0.00697575	0.0415186
FGA	0.517201	5.91328	0.000693469	0.00786945
TXLNG2P	0.512946	6.19225	0.0213377	0.0925791
DHRS9	0.509903	8.91834	6.82668e-05	0.00144463
HTR2B	0.509169	6.98241	2.73014e-06	0.000141745
FCN1	0.508093	11.2286	9.5856e-07	6.6094e-05
FRZB	0.507823	10.4696	1.41053e-08	2.92235e-06
IGJ	0.507526	13.9663	0.00134549	0.012649
IGDCC4	0.507491	6.61791	4.26748e-06	0.000191018
ADAMTS14	0.504915	7.21199	7.61474e-05	0.00156425
KIAA1199	0.503982	6.1855	2.41973e-12	6.52837e-09
KRT1	0.502369	8.05169	0.0215731	0.0930786
KRT6A	0.501661	5.3813	0.00801628	0.0461706
SERPINF1	0.499756	12.8966	3.1576e-07	2.94808e-05
HP	0.499182	13.7678	0.00790985	0.0457514
MMP11	0.494163	6.82803	0.000407103	0.00531261
PCSK1N	0.494106	11.9114	0.000186466	0.00303164
IL1B	0.493479	10.5921	0.00143809	0.0133125
THY1	0.493274	12.0042	0.00139501	0.0129966
IGF1	0.492205	9.16467	4.84321e-05	0.00113046
PTX3	0.491211	9.02753	0.0152728	0.0733387
TDO2	0.490739	6.59361	0.000451843	0.00574818
DPEP1	0.488833	5.16833	2.61569e-06	0.000137113
S100A12	0.488363	8.7508	0.00269946	0.020692
PROK2	0.488264	8.65871	0.00501446	0.0325528
CD69	0.486907	10.4821	0.000991154	0.0100991
WT1	0.486475	4.96572	0.00045417	0.00576767
PRG4	0.479248	7.70786	0.00610042	0.0376478
STAB2	0.47725	7.60195	3.11633e-05	0.000828761
IL11	0.477245	5.16001	0.000926901	0.00959724
CILP2	0.474913	6.19845	0.00315275	0.0231941
LOC283710	0.469852	7.1028	1.26708e-05	0.000427349
TIMP1	0.46652	11.9199	7.32473e-06	0.000280532
SFRP2	0.464758	8.57387	0.0139871	0.0686232
CD79A	0.461917	11.123	1.23227e-05	0.000417553
IGSF6	0.461529	8.5525	7.12498e-06	0.000275795
PRRX1	0.458487	11.3213	1.14731e-08	2.5468e-06
SMOC2	0.45709	9.91739	7.64194e-06	0.000290127
OSM	0.455863	8.12113	0.000867629	0.00917124
MMP17	0.455514	12.0293	0.00123405	0.0118576
LOC96610	0.454757	8.62657	8.98117e-06	0.000326171
PIM2	0.452888	10.6872	8.16757e-06	0.000304242
PCMTD1	0.452338	5.42223	0.000571577	0.00678717
LOC284191	0.451321	5.16795	7.82208e-06	0.000293889
NPTX1	0.446213	7.18797	0.00121966	0.0117509
PDK1	0.444162	9.0694	7.40108e-08	1.0126e-05
SULF1	0.441665	10.712	3.2357e-05	0.000846384
SELL	0.441644	9.89024	5.55916e-05	0.00125711
S100A8	0.4391	13.6049	0.000143082	0.00249269
PZP	0.438971	10.3006	0.000388324	0.00512286
TMEM238	0.43835	14.428	3.86372e-06	0.000178456
LOC100131043	0.438316	6.86798	4.47277e-05	0.00107396
DNASE1L3	0.437763	11.2809	0.00209545	0.0172896
LOC651536	0.437528	7.29641	0.00532097	0.0339151
ANGPT2	0.436268	8.77432	0.00028666	0.00406254
CPNE7	0.434509	10.0498	6.88436e-05	0.001454
ASGR2	0.434199	8.24497	5.92061e-07	4.68352e-05
CCL11	0.433954	6.87615	0.00172267	0.0151109
CREB3L1	0.433553	10.5564	2.34522e-05	0.000680478
TREM2	0.433372	9.7963	0.00122117	0.0117598
JSRP1	0.432504	6.3764	0.00136168	0.0127462
FAM177B	0.431869	7.75247	0.000335742	0.00458776
KCNK2	0.429146	5.48849	0.000102743	0.00194692
CLEC4G	0.428596	7.03167	5.55536e-06	0.000232072
FYB	0.427432	9.99385	2.04479e-08	3.86804e-06
DAPL1	0.426339	5.79935	0.000306062	0.00427074
SYNGR4	0.426086	11.1864	0.00168826	0.0148991
CD79B	0.423802	6.50836	2.26499e-05	0.000663156
ATP6V0D2	0.422821	5.88546	0.00592695	0.0368195
SERPINE2	0.422026	7.83318	1.84696e-06	0.000103287
XAGE1A	0.421928	8.55362	0.0464866	0.158159
HIF1A	0.420738	10.1436	1.41527e-06	8.64826e-05
MMP9	0.418456	11.4607	0.0119254	0.0613444
CD27	0.418086	9.13705	0.000649366	0.00748921
LUM	0.413988	13.7429	8.74012e-09	2.13632e-06
SLC1A3	0.413978	10.0918	0.000170027	0.00283213
VNN1	0.413858	8.37447	0.000652078	0.00750943
CD70	0.413537	8.09731	0.000201889	0.00319875
HOXC8	0.411624	4.72485	2.86241e-07	2.76111e-05
TIMP4	0.410598	6.14203	0.00128234	0.012187
ELF5	0.409907	7.2212	0.0019906	0.0167713
KRT81	0.409449	14.0769	1.27991e-06	8.21331e-05
UPK1B	0.409167	4.39606	0.00198925	0.0167664
COL1A1	0.408292	12.3842	0.0107447	0.0568767
HOXC4	0.406776	7.60175	0.000119417	0.00217388
SNAP25	0.404992	8.52286	2.86791e-05	0.000782658
FAM131C	0.404907	12.7028	0.000112164	0.00207661
RHBDL1	0.403068	13.688	0.000271	0.00391841
SPAG4	0.401655	7.68974	0.000165729	0.00277574
SLAMF7	0.400812	10.7537	0.000727995	0.00814651
SAMSN1	0.397785	9.57045	0.000637149	0.00739624
TNFRSF10C	0.396156	9.62802	7.53176e-06	0.000286946
BCL10	0.395505	6.71424	0.000105149	0.00198215
TLR10	0.395252	5.50959	2.95329e-05	0.000799077
FFAR3	0.394745	6.1091	0.0174791	0.0806128
LOC100128107	0.394604	13.1145	6.9231e-06	0.000271361
ELOVL2	0.393787	6.09047	0.00620759	0.0381469
C17orf63	0.393082	10.8735	5.74524e-05	0.0012845
AIM2	0.392527	7.48494	0.000340741	0.0046357
MADCAM1	0.392444	5.36644	3.79465e-05	0.000950947
LOC729860	0.391491	5.46058	0.000435697	0.00559891
CLDN2	0.390969	7.06146	0.00129089	0.0122377
VCAM1	0.390029	8.97245	0.0027545	0.0210147
FHL2	0.389234	11.1656	0.00025888	0.00379492
PCP4	0.389229	6.36451	0.000153534	0.00261959
SPSB4	0.388618	12.5267	0.000295216	0.00415881
SERPINA3	0.388301	10.8448	0.00090159	0.00942036
ICOS	0.388091	8.42583	5.51377e-05	0.00124944
CRIM1	0.387791	5.31498	0.000812372	0.00877911
DEFA4	0.387037	6.09104	0.0358872	0.132703
MMP10	0.38669	5.24557	0.0284856	0.112832
NNMT	0.386424	14.186	0.00186591	0.0159996
G0S2	0.386361	13.4457	0.000215574	0.00334364
AMPD1	0.38541	6.33489	0.000731389	0.00816414
TMEM132E	0.385043	6.02001	0.000152352	0.00260799
PODN	0.384298	7.46754	0.000197007	0.00314541
MAB21L2	0.383841	7.94793	0.0457815	0.156568
CTSK	0.383224	12.4565	0.000185066	0.00302327
TMEM229A	0.382854	5.61354	0.000764583	0.00840679
SYT4	0.382678	5.06538	0.0224998	0.0955418
LIF	0.380863	7.89111	0.00505998	0.0327897
TXNDC5	0.379205	11.8259	6.55726e-05	0.00140063
TMEM27	0.377818	7.2439	4.42657e-05	0.00106876
HABP2	0.376554	5.0697	5.61303e-05	0.00126466
CPNE5	0.375761	10.5877	0.000687687	0.00782856
FKSG2	0.375737	9.6271	0.000605244	0.00711317
NKX1-2	0.375517	11.0572	0.00129379	0.0122424
CILP	0.375393	9.07735	0.0210066	0.0915237
FBLN2	0.374886	11.0919	0.000111862	0.00207278
CALB2	0.372381	6.791	0.00282821	0.0214223
GDF15	0.372142	13.759	0.0049804	0.0323994
A4GALT	0.371819	13.8706	4.64709e-05	0.00109916
MS4A2	0.371574	8.65697	0.000229802	0.00348613
CCDC80	0.371259	8.75232	0.00307608	0.0227919
FAP	0.370159	10.223	0.000171669	0.00284858
MOXD1	0.369883	11.7005	2.50844e-05	0.000710528
RNASE2	0.369736	5.38599	4.9292e-07	4.12422e-05
CH25H	0.369133	10.8161	0.0423124	0.147889
C2CD4C	0.368793	9.94407	0.00031054	0.0043249
RSPO3	0.368421	8.28103	0.000277629	0.00397338
CFB	0.368354	11.3789	0.000259911	0.00380235
IER3	0.367866	11.5473	0.00869933	0.0489639
DPYS	0.367779	4.86484	1.40511e-05	0.00046703
TNFSF9	0.366812	7.55526	0.000182798	0.00299442
GDF6	0.36569	5.07805	2.84185e-06	0.000144106
RSPO4	0.365523	9.05056	0.000960681	0.00985321
TPSAB1	0.365501	10.9968	0.000340997	0.00463628
KCTD4	0.365075	4.41467	2.18714e-06	0.000118402
GPR183	0.36459	10.2326	0.00600652	0.0371909
PDGFD	0.364511	6.3463	0.000165748	0.00277574
ZNF771	0.364454	11.2391	0.000738209	0.00821432
AHRR	0.364152	6.07789	0.00586917	0.036563
TLR1	0.363078	9.8735	2.86658e-10	1.73221e-07
EAF2	0.361422	8.83527	1.30551e-06	8.30414e-05
EGFLAM	0.360239	7.78966	0.000458397	0.00580779
ITGBL1	0.359361	9.66622	0.000562778	0.00671568
CPA3	0.359197	12.0427	0.000201669	0.00319875
C7	0.358293	11.9101	0.000665841	0.00763304
NFE2	0.356528	10.1874	1.71062e-05	0.00054167
MIR100HG	0.355316	9.87301	5.09164e-06	0.0002189
WNT10A	0.35459	6.70741	3.83728e-05	0.000957297
FCRL2	0.354352	6.1248	0.000280013	0.00399961
TNFSF13B	0.354152	10.4814	3.54052e-07	3.20919e-05
ACCN4	0.352785	11.5246	1.92665e-06	0.000107193
ASTN1	0.352295	5.28113	0.000233007	0.00352983
VNN2	0.351688	10.3172	0.000730673	0.00816387
APOBEC3A	0.351573	9.01942	0.0252875	0.103617
NYX	0.351556	9.64983	0.000299409	0.0041973
HAMP	0.348892	8.4996	0.0157145	0.0748294
REXO1	0.348831	14.1196	3.27538e-07	3.03203e-05
CDH22	0.348588	12.1797	0.000109013	0.00204286
NR1D1	0.348125	7.23244	0.00200441	0.0168355
LINC00176	0.347869	11.7935	0.00119714	0.0116003
CPVL	0.347839	10.4496	1.08817e-06	7.33596e-05
MEOX1	0.347743	5.74979	0.00736911	0.0433381
HTRA4	0.347557	7.08747	0.0260633	0.105938
DERL3	0.345691	9.63072	1.93615e-05	0.000591559
IRF4	0.345246	6.85358	0.00283164	0.0214409
LOC100653245	0.34476	6.78786	0.0172766	0.0799647
SLC17A9	0.344684	9.45534	1.29928e-05	0.000436182
KIF26B	0.344098	7.10394	3.45025e-10	1.97518e-07
FCRL1	0.343978	6.30518	8.55456e-05	0.00170106
ITGA11	0.343857	8.03988	0.000622583	0.00726591
LOC728978	0.343697	8.20803	0.000842236	0.00899902
PDE1A	0.342645	7.11157	3.0042e-05	0.000806833
CCR7	0.342242	10.8888	0.00373593	0.0261743
LOC401463	0.341782	5.06229	3.75114e-08	6.0543e-06
EIF1AY	0.341231	8.90387	0.0499401	0.166105
SPRNP1	0.340755	11.4444	5.67258e-05	0.00127218
SEMA3D	0.340349	9.18855	3.91786e-05	0.000970719
MFAP2	0.339937	8.97197	2.48557e-05	0.000708214
CCL7	0.339934	5.33923	0.0123552	0.0629893
PLAU	0.338456	12.1559	6.28407e-06	0.000252304
PTPRZ1	0.337869	6.39694	0.00564038	0.035391
GPR84	0.336667	6.49367	0.000764406	0.00840679
QPCT	0.335852	8.5321	9.85339e-05	0.00189691
FKBP11	0.335797	11.1255	0.000158236	0.00267673
STAP1	0.335187	5.77694	2.53409e-06	0.000133803
COL3A1	0.335015	9.71944	0.0250058	0.10294
OR10H2	0.333047	10.421	0.000507302	0.00627235
LOC100131138	0.332871	6.58453	0.0292567	0.114945
SPON1	0.33223	12.7763	1.08925e-08	2.5208e-06
NACAP1	0.331887	11.6512	3.15956e-08	5.49864e-06
IL10	0.331695	6.57387	0.00169934	0.0149485
COLEC11	0.330913	9.32345	0.00378285	0.026422
PPIF	0.330507	11.8544	6.28208e-05	0.00136744
ASB16	0.330485	8.95667	0.00455596	0.0302989
VSTM1	0.329329	7.76612	0.0190115	0.0852208
EGR2	0.329021	11.9911	0.0167507	0.078213
C21orf96	0.328883	8.71733	2.13944e-07	2.26569e-05
CLEC5A	0.327989	5.74444	0.000247884	0.00369601
MTHFD2	0.327547	10.3156	0.000129112	0.00230032
SAA2	0.326662	6.00626	0.0481064	0.161847
SV2B	0.326344	8.88139	2.11993e-05	0.000632607
CLEC11A	0.32473	11.6911	1.0161e-05	0.000358836
TNFAIP6	0.323288	7.7978	0.0327947	0.12444
AWAT2	0.323239	6.28259	0.038761	0.139729
IL1RN	0.323066	9.58882	0.00117855	0.0114507
LDLRAD2	0.32297	6.5913	6.41495e-05	0.00138581
LIPA	0.322124	13.6255	0.00248004	0.0194984
P2RY6	0.32185	7.41451	0.000124547	0.00224102
ACAP1	0.32113	7.362	0.000137097	0.00240207
PTGIS	0.320964	11.1607	0.000243157	0.003643
CCDC78	0.320057	12.5942	0.00134412	0.0126416
NAMPT	0.31945	11.5263	0.0202008	0.0889933
SLC22A18AS	0.318129	6.68037	8.55623e-06	0.000315478
RARRES1	0.317173	10.3052	0.00175404	0.0152936
CLEC4A	0.317151	9.90204	3.32751e-08	5.65731e-06
LOC339803	0.316114	8.80888	0.00220439	0.0179081
LOC283663	0.31546	10.0987	0.000736139	0.00819621
FAM55D	0.315075	4.59485	0.000243508	0.00364575
C1orf158	0.314722	9.60814	0.00438788	0.0294793
CDKN2A	0.314618	8.57399	0.00038107	0.00504246
INHBA	0.31381	12.8841	0.00965286	0.0526815
NCF1	0.313103	9.64604	0.00040761	0.00531604
PRSS36	0.312918	10.3227	0.0421907	0.147582
KCNK12	0.312753	6.44228	0.00262344	0.0202809
CDCA7	0.312673	7.87044	1.83988e-05	0.000569342
LRRN4CL	0.311439	6.73276	0.000610081	0.00715841
CD48	0.311257	9.25509	8.4732e-05	0.00168797
SCG5	0.311045	6.32756	0.0164825	0.0773595
2022-03-01	0.310792	6.94972	1.6547e-05	0.00053092
HBQ1	0.310645	9.24309	0.0327012	0.124204
GJB2	0.310552	5.78294	0.0108204	0.0571881
F13A1	0.31042	9.82526	0.000312371	0.00433929
GFRA1	0.310402	8.74845	7.65831e-05	0.00156879
CXCR2	0.310038	9.90318	0.0162893	0.0766674
DARC	0.308596	7.32528	0.0063577	0.0388607
SULF2	0.307702	12.6357	2.94599e-05	0.000798094
ATP8B4	0.307658	6.9487	5.58093e-06	0.000232072
OAF	0.307604	8.65305	0.000444798	0.00567912
TMEM176A	0.307494	10.3335	7.11866e-06	0.000275795
BLNK	0.30733	7.61695	2.05311e-05	0.000619465
CD8B	0.307248	7.94916	0.00076478	0.00840679
CR1	0.307146	5.38353	3.50312e-05	0.000899156
FNDC4	0.30545	7.36867	0.00127335	0.0121227
SOAT1	0.305266	9.44229	3.85251e-06	0.000178456
FMO1	0.304413	7.02536	0.00245969	0.0194011
DUSP2	0.30423	9.07007	0.0367004	0.13468
GPR34	0.304138	8.47361	6.81824e-05	0.00144425
HBM	0.30363	7.95092	0.0429128	0.149388
CHRNA1	0.303147	5.15318	0.000854761	0.00908599
CLEC7A	0.302917	6.57275	7.28003e-06	0.000279312
PLTP	0.30256	10.9634	0.000249784	0.00370908
FCGR2C	0.302374	10.1513	6.09725e-05	0.00133696
MNDA	0.301463	11.0589	5.85235e-05	0.001301
PNPLA3	0.300838	7.97188	0.0484245	0.162538
FCER1A	0.299214	9.73932	0.00575626	0.0360001
GLIS1	0.299052	6.80442	1.492e-05	0.000490286
CEBPE	0.298908	7.28825	0.000123747	0.00223216
LY96	0.298798	10.6359	1.08404e-05	0.000377316
FAM43B	0.298777	7.13596	0.02821	0.11211
BFSP2	0.298705	5.24348	0.00114082	0.0111941
ELFN1	0.298584	14.4353	0.00107791	0.0107563
ALDH1A3	0.298351	9.36796	0.013596	0.0674498
LOC730020	0.297452	6.39096	0.00135621	0.0127113
SLC38A11	0.297435	4.57348	0.000133047	0.00234737
APOH	0.297398	9.09123	0.0326254	0.124039
CLEC12A	0.297099	7.16618	0.000951815	0.00979341
RET	0.296935	6.14379	8.02709e-09	1.99141e-06
VSIG7	0.296776	4.96318	0.000753235	0.00832805
TNFRSF18	0.296771	6.97191	0.000844673	0.00902063
RUNDC3B	0.295904	6.25303	0.0337436	0.127022
C3	0.295633	14.0138	5.09223e-05	0.00117589
MYRIP	0.293388	8.62927	0.0178954	0.0819915
CPA6	0.293259	4.69035	0.000731866	0.00816462
RGS18	0.293185	9.95966	0.000658565	0.0075681
ACTL6B	0.293157	6.36343	0.00355117	0.0251882
TNFRSF13C	0.293129	5.66663	0.00021547	0.00334364
BCAT1	0.293003	8.94846	0.000403577	0.00528078
CPXM2	0.29283	8.87297	0.00539504	0.0342568
GPAM	0.292465	8.98743	0.0020439	0.0170291
ITGB2	0.292458	12.5264	3.28829e-06	0.000158762
HGF	0.292411	7.43699	3.71603e-06	0.000173846
TM4SF19	0.292406	5.98992	0.0157371	0.0748879
DRD2	0.292215	5.5655	0.00614849	0.0378585
KRT222	0.291658	6.48835	0.000899191	0.00939981
C1QTNF4	0.291596	7.92614	0.0072182	0.0426697
LOX	0.291528	7.61125	0.000217234	0.0033611
BCL2A1	0.29136	10.4348	0.000302331	0.00422952
CCR2	0.2911	7.68213	0.000120941	0.00219428
ACBD4	0.291038	9.07202	0.00254519	0.0198736
LOC100131094	0.290791	8.84294	0.000166961	0.00278961
CMTM2	0.290752	7.02444	0.00993261	0.0537899
CLEC4D	0.29049	6.54915	0.00340386	0.0244543
PODNL1	0.290367	5.80296	4.79032e-05	0.00112173
CCR3	0.290184	5.4017	0.00114838	0.0112328
ASPHD1	0.290105	7.88394	0.00706971	0.0419516
ARHGAP15	0.290039	9.55541	2.2232e-07	2.31404e-05
OBFC2A	0.289999	9.42238	0.000255177	0.00376859
MTHFD1L	0.289767	8.10411	2.86849e-07	2.76111e-05
ADAMTS16	0.289171	5.11448	0.0316754	0.121315
RGS13	0.288856	7.24474	0.00204932	0.0170481
ADAMTS18	0.288705	4.77961	0.0104399	0.0556082
CHI3L2	0.288545	9.83798	0.0312821	0.120309
GPNMB	0.288306	10.833	0.00133699	0.0125963
ICAM3	0.288275	11.8168	5.57293e-06	0.000232072
TPSD1	0.288108	8.72551	0.00112396	0.0110736
SLC7A5	0.288078	8.00112	0.0405628	0.143948
C1S	0.287902	13.3891	9.60085e-07	6.6094e-05
HLA-DQA2	0.287652	12.1697	0.0477837	0.161161
C3orf32	0.28691	6.56289	0.00998229	0.0539458
TMEM119	0.286856	10.6672	0.000130047	0.00230942
CD22	0.286705	6.48307	0.000448296	0.00571308
KIAA0226L	0.286563	7.81371	0.00125085	0.0119609
GPR18	0.286262	6.33133	0.00174719	0.0152583
OLR1	0.285244	9.61618	0.0141474	0.0691914
BTLA	0.285033	6.21874	0.00384974	0.0267905
C5orf58	0.284874	5.97843	0.000322957	0.00444659
GPR65	0.284771	8.86568	6.59112e-05	0.00140572
WISP2	0.28425	13.7266	0.00401532	0.0276422
RAB26	0.284146	7.77597	0.00606625	0.0374901
KCND2	0.284055	5.53595	0.000179335	0.00294657
FGF7	0.283499	7.81619	5.28751e-05	0.00121206
C11orf20	0.283169	8.76151	0.000858194	0.00911135
TMEM154	0.282733	6.3853	3.23504e-07	3.00748e-05
PSAT1	0.282619	7.03114	0.00342568	0.0245622
SOX18	0.281823	5.18241	0.000323781	0.0044539
CLLU1OS	0.281603	5.0321	0.021789	0.0936754
CFI	0.280783	10.9866	3.78123e-05	0.00094956
C4B	0.279576	12.4069	0.0036357	0.025629
ROR2	0.27905	7.43003	1.63633e-06	9.56946e-05
CCR10	0.278874	9.59309	6.55187e-06	0.000260566
PAMR1	0.278646	8.97113	0.0122156	0.062412
UTF1	0.277875	10.7145	0.0142127	0.0694327
CXCL12	0.277845	10.4582	1.33233e-06	8.37675e-05
IL2RA	0.277391	6.40157	0.0124286	0.0633073
RNASE6	0.27729	9.42454	0.000217649	0.0033626
MPEG1	0.277186	8.74152	2.81324e-06	0.00014337
VWCE	0.276957	8.52214	1.96922e-05	0.000599137
SLC45A3	0.276929	10.2868	0.000218267	0.00336273
VMO1	0.276747	10.4288	0.00176583	0.0153533
SLC28A3	0.276157	4.87303	0.00106668	0.0106639
LINC00152	0.275679	9.86751	0.000255709	0.00377313
CLEC10A	0.275499	10.4238	0.00283822	0.0214607
GLT1D1	0.275301	8.40378	0.00628729	0.0385387
CCM2	0.274457	9.90106	3.63461e-05	0.000924326
FAIM3	0.27439	7.9259	4.72332e-05	0.00111202
AEBP1	0.274092	13.2986	0.000100437	0.0019194
MIAT	0.273783	9.07003	0.00241751	0.0191239
FOXC1	0.273259	8.84742	0.0153943	0.0737474
APOE	0.273155	16.5668	0.00955264	0.0522656
LOC642826	0.273018	8.33722	0.001743	0.0152278
C1orf51	0.272118	6.89801	0.0249325	0.102717
FAM198B	0.271981	10.6129	0.00128801	0.0122196
RGL4	0.271964	9.16483	0.00249704	0.0195929
PTGDR2	0.271837	5.76032	7.42126e-05	0.00153608
KCNN4	0.271291	9.99517	0.0038035	0.0265388
C15orf48	0.271179	9.59241	0.0483929	0.162538
WFIKKN2	0.269782	5.71874	0.00116222	0.0113123
LY6H	0.269751	5.81557	0.0222048	0.0947667
SAMD11	0.269702	10.4434	2.59975e-07	2.58242e-05
ZBP1	0.269673	7.30726	0.000630381	0.00734067
SH2B2	0.269621	10.9417	1.73906e-05	0.00054749
ACTR3BP5	0.269265	7.6249	0.00830376	0.0472756
CXCR1	0.268836	7.0806	0.0324138	0.123467
TREML2	0.268804	6.09985	0.00243879	0.0192712
FBXL19	0.268598	9.60856	0.000275391	0.00395436
GLIPR1	0.268268	8.19795	2.61188e-05	0.000734579
FCGR2B	0.268218	10.0034	0.0033152	0.0240476
IFITM1	0.267919	13.2164	1.10085e-05	0.000381336
VAX2	0.267904	7.69194	0.00686159	0.0410413
TMEM236	0.267327	6.92427	0.00038977	0.00513882
KMO	0.267289	7.96343	0.000197173	0.00314541
RAB3IL1	0.267284	7.12823	1.68638e-05	0.000536339
SLC37A2	0.267219	7.90255	0.000382483	0.005055
RBP7	0.266686	8.63196	0.00290153	0.0218031
MCTP1	0.266627	7.55946	0.000187543	0.00304236
SSR4	0.266462	13.2278	7.57831e-07	5.60743e-05
CSF2	0.266436	6.778	0.0182426	0.0830229
ALPK2	0.266373	4.58263	0.00319203	0.0234195
IGFLR1	0.266164	12.0982	0.00162722	0.014541
SLITRK4	0.26615	7.16916	0.00107467	0.0107388
EPB42	0.265949	6.05474	0.00722438	0.0426831
CDH3	0.265896	8.53926	0.0474766	0.160299
TMEM158	0.265673	6.5928	0.00372776	0.0261508
SNAI2	0.265646	9.23459	0.000266351	0.00387312
LILRB5	0.265416	10.6777	0.00865693	0.0488009
LRRN2	0.26529	9.0335	5.31956e-05	0.00121684
BHMT2	0.264748	6.39245	5.91058e-06	0.000241236
SCAMP5	0.264689	7.46626	0.00209388	0.0172866
NIP7	0.264456	12.0585	0.0192231	0.0858399
CYTL1	0.263989	6.56007	0.020052	0.0884989
DBP	0.263465	8.59866	0.00916905	0.0507412
GATA5	0.263451	8.01611	0.0185361	0.0838608
ALDH1A2	0.263332	5.80227	0.000227748	0.00346222
TWSG1	0.262601	9.20792	3.3981e-05	0.000880027
PCK1	0.262481	4.69337	0.00885811	0.0495244
NPY1R	0.261666	6.58885	0.0152472	0.0733013
CD4	0.261595	13.4941	3.21153e-05	0.000845235
SPNS3	0.261542	8.04539	3.35529e-06	0.000161128
CDKN2C	0.261053	9.71721	1.61949e-06	9.56946e-05
LRMP	0.260766	9.99841	0.000174826	0.00288775
THEMIS	0.259999	6.96787	0.00267405	0.0205625
PVT1	0.259566	7.21817	5.60654e-05	0.00126466
BPIFB2	0.258663	6.65668	0.000361106	0.00485056
LY9	0.258621	7.99598	5.91198e-05	0.001311
ZNF29P	0.258131	6.25757	0.00204084	0.0170119
SRPX2	0.258019	8.6857	0.000213452	0.00332623
LOC100652762	0.257921	11.5914	0.00163582	0.0145664
EVX1	0.257801	11.2037	0.0125812	0.0638569
SIGLEC5	0.257755	6.63018	0.00853345	0.0482298
LOC729770	0.256953	7.31137	0.00147593	0.0135703
LOXL1	0.256843	10.591	0.000365072	0.00489327
LOC728054	0.25683	13.2451	0.00278867	0.0212115
MAN2A1	0.25669	9.55186	4.47167e-06	0.000198524
FCRLB	0.256238	6.80987	0.00123654	0.011871
PHOSPHO1	0.256192	10.1608	9.71536e-05	0.00187531
SNAI3	0.256074	8.06823	0.000493017	0.00613212
GZMK	0.256058	9.86273	0.0239695	0.0998341
ACSL4	0.255985	10.0757	0.00075182	0.0083232
MEI1	0.25597	10.9339	0.00230835	0.0184661
CRTAM	0.255761	7.91199	0.00336218	0.0242108
RPS10P7	0.255593	14.7102	9.71341e-06	0.000346402
DIRAS1	0.255359	6.76548	0.0023416	0.0186659
TNFRSF13B	0.255307	4.99326	0.000449124	0.00572028
NEURL	0.255101	11.8323	0.0379573	0.137735
ZNF117	0.254488	8.61415	0.00214122	0.0175576
NPB	0.254092	8.32692	0.00223285	0.0180402
OXT	0.253949	8.35874	0.00183302	0.0157923
DNAJB9	0.253773	11.8501	1.1501e-06	7.612e-05
CDA	0.253504	7.07624	0.000203233	0.0032107
ALK	0.25348	4.89491	0.0127872	0.064571
DOK5	0.253473	5.89508	0.00209663	0.0172896
TMEM59L	0.253268	6.89874	0.000353123	0.00476245
RHOH	0.253062	8.97887	0.00508849	0.0329156
MPO	0.25284	6.35173	0.0102657	0.0550413
FOLR2	0.252661	10.7081	0.00186907	0.0160078
TMEM38B	0.252456	7.0904	8.58047e-06	0.000315837
LGALS12	0.251923	6.94728	0.00275813	0.0210232
MMP23B	0.251274	11.08	0.000115212	0.00211536
LCE1A	0.251041	12.3159	0.000228579	0.00347
CD28	0.251019	7.0846	0.00171981	0.0150997
CYBB	0.250925	12.1337	0.000925736	0.00959646
C6orf138	0.250878	5.71423	0.00175942	0.01533
MNX1	0.250619	6.0257	0.0371681	0.135874
WNT6	0.25053	7.00197	0.000209074	0.00328152
D4S234E	0.250178	7.15468	0.00397232	0.0274243
KDELR2	0.249766	11.0195	6.54403e-06	0.000260566
FFAR2	0.249169	6.22621	0.00346365	0.0247368
FER1L4	0.249045	6.83023	0.0043818	0.0294475
OR52K2	0.248803	5.96253	1.13433e-05	0.000389761
SCGB3A1	0.248285	15.1669	0.0345212	0.129144
SSTR2	0.248265	6.07398	0.0222917	0.0950105
PVALB	0.248128	6.32446	0.0131409	0.0657769
LOC100132891	0.247694	5.00776	9.5289e-09	2.27793e-06
FLJ41941	0.247083	4.00702	0.0397143	0.141769
PLAT	0.24704	11.8777	0.0024801	0.0194984
OGN	0.247006	9.37534	0.0491666	0.164322
CSDC2	0.246905	7.03294	7.52847e-05	0.00155252
PLVAP	0.246878	8.24005	0.0192932	0.086034
DTX1	0.246849	6.49567	0.000763175	0.00840188
ADRA2A	0.24684	8.80639	0.00392015	0.0271936
CCT8L2	0.246806	5.28233	0.000380478	0.00503769
ITGAX	0.246608	9.98061	0.00462935	0.0306571
PRR25	0.246502	13.6685	0.0108732	0.0574116
SLAMF1	0.246286	7.70635	0.00215857	0.0176322
ZBTB32	0.246141	6.82504	0.00128653	0.0122108
FAM49B	0.245974	11.6149	4.2947e-08	6.72136e-06
SMPDL3A	0.245493	10.3254	0.000156792	0.00266057
MSC	0.245447	5.70375	0.000760584	0.00838608
AEN	0.245418	7.70348	0.000400646	0.00525673
RELT	0.245349	10.4712	1.4062e-05	0.00046703
MXD1	0.245177	9.99596	0.00347195	0.0247717
MRAP	0.244968	5.01368	0.000101793	0.00193737
AQP9	0.244603	10.3997	0.0198303	0.087734
LOC282997	0.244601	9.43809	1.90106e-07	2.07025e-05
MS4A4A	0.244018	12.2524	0.00170384	0.0149759
FGL2	0.24383	9.23154	0.0033611	0.0242108
LOC100130298	0.243478	6.13462	0.000196417	0.0031395
IER5L	0.243043	9.67277	9.08238e-07	6.37348e-05
BASP1	0.243034	12.0037	0.00533689	0.0339868
CTSS	0.242487	7.96139	0.00156447	0.0141688
PGF	0.242063	7.93214	0.00560793	0.0352311
NFAM1	0.241989	10.6947	0.00840699	0.0477047
HRC	0.241949	7.42651	3.23707e-05	0.000846384
RCN3	0.241869	7.95238	0.000216848	0.00335751
HDC	0.241061	11.5008	0.0189822	0.0851421
SCN3B	0.24104	7.77317	0.0123928	0.0631512
C1R	0.240802	14.4549	4.13194e-05	0.00101337
APOD	0.240684	6.53904	0.029163	0.114769
HCAR3	0.240567	10.7586	0.00986512	0.053491
GCA	0.239582	11.9253	6.81803e-05	0.00144425
SH3PXD2B	0.239537	8.63503	0.00145394	0.0134249
FSTL5	0.239251	4.454	0.00234373	0.018676
LYST	0.238751	10.3432	0.00035282	0.00476131
SNORA71A	0.238577	10.7864	0.0309493	0.119459
MED29	0.238513	6.49369	0.0168499	0.0785584
PCSK1	0.238374	5.00719	0.0338581	0.127298
TMEM176B	0.237851	10.6068	0.00161421	0.0144762
CENPW	0.237648	8.65689	0.000143599	0.00249709
RDH10	0.237397	9.37012	0.0108915	0.0574803
LOC100129960	0.237287	9.60952	0.000567811	0.00674612
TREML1	0.237272	5.68159	0.000851026	0.00906179
OGFRL1	0.237271	9.77759	5.56185e-06	0.000232072
ST3GAL6	0.237105	8.55093	0.000241517	0.00362377
DIRC1	0.237072	10.5214	0.0161343	0.0761357
SLC16A10	0.236951	6.26728	0.0190558	0.0853485
PLAUR	0.236916	10.6069	0.020381	0.0895973
CHL1	0.236631	6.24128	0.00338632	0.0243524
CMA1	0.236619	5.24489	0.00277805	0.0211455
ZNF205	0.236525	10.1304	0.00410823	0.0281039
P2RY8	0.236217	8.80589	0.00731083	0.0430535
TMEM82	0.236139	10.2226	0.000386565	0.00510586
NGFR	0.235855	6.22388	0.0149587	0.0723135
RBP4	0.235792	11.3148	0.0492267	0.164447
UNC5A	0.235749	5.63186	4.30746e-05	0.00104815
EGLN3	0.235748	7.26977	0.00103614	0.0104449
TNFSF14	0.235746	9.33931	0.0228433	0.0964956
NPL	0.235654	9.5387	0.00101842	0.0103189
GAPT	0.235513	6.17867	0.000873795	0.00922744
TMEM45A	0.235326	11.4765	0.00544211	0.0344751
CHST15	0.235083	11.1651	1.09806e-06	7.34987e-05
EDA2R	0.234764	6.19609	3.19466e-05	0.000843406
KRT73	0.234237	10.5217	0.000676357	0.00773579
PTGDS	0.234229	13.5876	5.62164e-05	0.00126466
FCAR	0.234176	5.56938	0.0422054	0.14761
NCF2	0.234167	12.8433	0.000811394	0.00877725
ADAM28	0.234086	7.18463	0.00446525	0.0298791
ADH1A	0.233466	12.0447	0.00109495	0.0108914
FCGR2A	0.233057	11.7442	4.63164e-05	0.00109916
FLJ22184	0.232807	13.3264	0.00955074	0.0522656
SNHG3	0.232673	11.146	0.000785291	0.00856386
CD180	0.232304	5.16618	0.00126546	0.0120635
AOAH	0.232073	8.39205	0.000723103	0.0081001
IFI16	0.231615	11.1669	2.61576e-05	0.000734579
TNF	0.231547	8.88602	0.0358293	0.132556
PTGS1	0.231402	9.52375	3.91034e-06	0.000179463
MESP1	0.23123	7.60354	0.00424597	0.0288114
MRC1	0.231129	12.2406	0.00490639	0.0320156
LOC400043	0.231126	8.44213	0.000812904	0.0087805
SRGN	0.230955	13.6835	0.000427484	0.00552227
FLJ43903	0.230857	4.48781	0.000713912	0.00801365
CPEB1	0.230562	8.33527	0.00688223	0.0411534
EFCAB4A	0.230468	11.1606	8.08635e-06	0.000302772
CD96	0.230376	8.77519	0.00306922	0.0227643
KCNS2	0.230362	4.26963	0.00231669	0.0184944
CD1C	0.23021	6.07403	0.00858551	0.0484863
MMRN1	0.230138	10.2206	0.0391471	0.140599
FGF11	0.230046	5.09961	0.00124489	0.0119248
CD163L1	0.229963	8.24567	0.00736591	0.0433324
TM4SF18	0.229906	7.78756	0.0127987	0.0645844
ABCB4	0.229762	6.34373	0.00235908	0.0187346
PDGFRA	0.229479	10.8788	0.00124971	0.0119605
HAPLN3	0.229249	10.6831	0.0265676	0.107446
EVI2B	0.229164	8.55751	0.000645988	0.00745903
HPSE	0.229117	6.87282	0.00546119	0.0345457
STARD5	0.229022	7.73473	6.35105e-05	0.00137747
MT3	0.228885	12.1124	9.21441e-06	0.000331871
RPL13AP3	0.228646	14.706	2.61159e-06	0.000137113
DUSP5P	0.228152	6.92277	0.00507246	0.0328412
SIT1	0.228113	7.4531	0.021233	0.0922882
SULT1C3	0.227988	6.32191	0.0480718	0.161788
LOC100133286	0.227976	7.38502	0.0010613	0.0106325
NLRP7	0.227848	5.1965	0.00591419	0.0367697
HIST1H3J	0.227561	9.86878	0.00840541	0.0477047
LOC497256	0.227252	7.49352	0.000489474	0.00609699
SLC6A7	0.227221	5.2412	0.000497412	0.0061762
PDE7B	0.227212	8.46256	0.00201755	0.0169132
PADI4	0.226906	5.07519	0.00974264	0.0529854
QPRT	0.226844	9.40804	4.36048e-05	0.00105868
SLC10A2	0.226742	5.18375	0.0223456	0.0951099
EMR3	0.226645	6.79721	0.0369459	0.135352
RASGRP1	0.226242	9.52868	0.0059042	0.0367181
PTPN7	0.226116	8.7848	0.00363308	0.0256188
C9orf173	0.226004	8.99048	0.00121465	0.011723
ALOX5AP	0.225953	12.0465	0.00786322	0.0455665
CA1	0.225838	6.08973	0.0153127	0.0734539
KLHDC7B	0.22567	7.71119	0.0170923	0.0793821
REREP3	0.225471	8.82212	0.00010572	0.0019912
LCE1E	0.225428	7.88153	0.0245495	0.101588
TRIM58	0.225425	8.52903	0.0498161	0.165855
BAAT	0.22535	4.52574	0.00844115	0.04782
VCAN	0.224892	10.7816	0.0133502	0.0665657
LOC389023	0.22476	5.91944	0.0344575	0.128973
NEK6	0.224073	9.09913	3.77484e-05	0.00094934
STAB1	0.223768	10.6918	0.000463169	0.00584781
SDSL	0.223592	11.66	0.00113609	0.0111578
LOC145820	0.223222	8.23695	0.00102268	0.0103573
BLM	0.222794	7.79252	0.0016485	0.0146646
GNG2	0.222767	8.51738	0.000684837	0.00781224
PTGES	0.222642	5.23135	0.000273948	0.00394441
LY86	0.222637	11.921	0.00191175	0.0162708
CYP4F30P	0.222633	7.13415	0.00153324	0.0139324
CORO1A	0.222492	11.6384	0.00260117	0.0202017
CYGB	0.222181	13.1704	0.00186688	0.0160004
CDH2	0.222071	7.17184	0.0401216	0.142942
HLA-DOB	0.221952	8.6878	0.0109286	0.0576028
FAM69A	0.221682	7.27878	2.2166e-06	0.000119356
PADI2	0.221582	6.01143	0.00328701	0.0239069
RAB42	0.221042	8.42047	0.0490816	0.164164
COL5A2	0.22066	10.9141	0.022865	0.096546
KCNJ2	0.220456	9.68804	0.00110122	0.0109338
CYTH4	0.219966	9.07338	0.000208593	0.00327941
SIGLEC7	0.219595	7.21246	0.00511438	0.0329724
MIR155HG	0.219517	6.17172	0.00280643	0.021287
GXYLT2	0.219221	9.55348	0.000237966	0.00358996
DUSP26	0.218641	10.0743	0.0490949	0.164183
LINC00426	0.218526	7.59076	0.0187244	0.0844266
LOC100216545	0.21827	8.94342	8.23237e-07	5.8848e-05
LILRB1	0.217964	9.94231	0.00178749	0.0154921
EVI2A	0.217805	9.79483	0.00186747	0.0160004
ZNF750	0.217456	8.30499	0.0312296	0.1202
KIRREL2	0.217299	7.39938	0.00132411	0.0124912
KCNAB1	0.216643	7.01113	0.0184018	0.0834852
KCNH8	0.216416	5.28538	0.0111377	0.0583969
NKAPL	0.216202	8.72268	0.00149308	0.0136764
LOC375295	0.21615	5.29711	0.0103284	0.0552232
LRRC26	0.216052	10.3232	0.000611602	0.00717239
GPX8	0.215992	7.87612	0.0049156	0.0320642
FBXO41	0.21597	8.59804	5.01516e-05	0.0011656
C6orf192	0.215866	9.54882	0.00026024	0.00380462
PLOD2	0.215831	10.0785	0.0029304	0.0219518
LAX1	0.215712	7.19776	0.0145309	0.0706383
AMPD2	0.215668	9.85904	7.85882e-06	0.00029476
JAK3	0.215536	8.66906	0.000172733	0.00286141
TYROBP	0.215173	15.0583	0.000312785	0.00434226
ZNF469	0.215038	9.31331	0.00306725	0.0227643
DAPP1	0.214917	8.83713	0.00312921	0.0230599
DOCK10	0.214359	10.4575	0.000552527	0.00664437
MGC45922	0.214064	11.9447	0.0189572	0.085065
PF4V1	0.213973	5.06383	0.0276988	0.110809
CPE	0.213861	12.1764	0.00216675	0.0176736
NCF4	0.213835	10.6015	0.000102354	0.001945
KIAA1024	0.213827	5.8311	0.00222493	0.018013
IL23A	0.213797	8.09682	0.000746801	0.0082845
ARHGAP9	0.213772	11.3743	0.000168118	0.00280678
FGF2	0.21336	7.30326	0.0283373	0.112491
SLC5A3	0.213304	10.4861	0.000667127	0.00764227
ZNF267	0.213047	8.70896	0.00241077	0.0190913
HRASLS5	0.2129	9.48379	0.00288603	0.021715
EMR2	0.212722	8.50032	0.00633019	0.0387361
MS4A7	0.212481	12.6465	0.00581713	0.0363091
LOC440132	0.211988	4.65075	0.00036727	0.00491667
FAM20C	0.211363	12.3746	7.82932e-05	0.00159406
KCNK4	0.211093	5.47303	0.0121486	0.0621552
C17orf107	0.21109	8.46334	0.0228314	0.096479
GPR132	0.210855	8.98426	0.0121405	0.0621421
ZNF737	0.210676	5.77932	6.56084e-05	0.00140063
UCHL1	0.210553	10.2972	0.0277862	0.111032
PCBP3	0.21034	4.88349	5.60137e-06	0.0002321
CD53	0.210226	11.9713	0.000790775	0.00860987
CYBA	0.210205	12.1551	0.000132075	0.0023387
MST4	0.210115	10.0031	0.000264264	0.00384535
MMD	0.210099	10.6155	4.77411e-06	0.000210661
CCL24	0.210054	11.0109	8.16422e-05	0.00164907
MMP25	0.209981	8.41781	0.0178605	0.081918
POM121L9P	0.209094	5.28654	0.0023108	0.0184677
BID	0.209009	11.5932	8.79794e-06	0.000321125
SPRR1A	0.208846	7.92136	0.00114044	0.0111941
PABPC3	0.208824	13.239	0.000150751	0.00258631
INSL3	0.20881	7.33762	0.000708862	0.00797341
PDGFC	0.207881	10.4577	1.49071e-05	0.000490286
LOC100130430	0.207415	10.293	0.00145967	0.0134563
PNPO	0.206695	11.1218	0.000285993	0.0040587
LPAR6	0.205968	9.9653	0.000559737	0.00670668
STK32B	0.205956	5.52433	0.00185101	0.0158906
LRRC25	0.205846	9.33272	0.00163234	0.014559
ZP1	0.205712	5.33584	0.000227204	0.00346184
SEMA6B	0.205325	7.093	0.00333555	0.0241389
ZNF385D	0.205011	5.66241	0.0170351	0.0792486
BCL2L11	0.20451	9.51848	0.000462243	0.00583951
IRX6	0.204457	5.9713	0.0141185	0.0690656
CBX3	0.204438	10.5238	4.30603e-06	0.000191954
KLF1	0.20434	6.932	1.07678e-05	0.00037539
CTRB2	0.204269	11.6814	0.0110988	0.058221
PTGER1	0.204121	7.85729	0.0305026	0.118323
FRMD1	0.204033	6.25644	0.0137722	0.0679641
FAM46C	0.204032	12.2714	0.0121836	0.0623044
PDCD4	0.203893	9.70893	0.00110368	0.0109483
CSF3R	0.203687	12.8661	0.00177618	0.0154247
KRT84	0.203619	3.81148	0.0158924	0.0753907
TMEM71	0.203348	8.16098	0.00666709	0.0401813
FGF9	0.203051	7.17734	0.0213709	0.0926285
COPZ2	0.20301	9.69148	0.000523415	0.00642209
GSC	0.202637	5.85485	0.0349155	0.130149
VMP1	0.202616	12.0711	0.000444001	0.00567831
LOC399900	0.20261	6.68981	0.00302647	0.0225348
LOC283731	0.202491	5.98363	0.017355	0.0802424
NLGN4Y	0.202106	5.51189	0.0253584	0.103849
PLEK	0.202066	9.6543	0.0138994	0.0683473
CCDC88A	0.201803	9.95651	0.00100989	0.0102468
LGI2	0.201336	5.45413	0.00484209	0.0316987
UBE2J1	0.201144	10.2504	0.000440647	0.00564204
BAG2	0.201066	10.0982	0.000166071	0.00277901
SLC18A2	0.200355	6.19018	0.00407192	0.027917
TUBA3D	0.200273	8.76159	0.00651247	0.039441
PNMA5	0.200092	8.10348	0.00369591	0.0259693
TTYH1	0.200089	7.46718	0.00829339	0.0472412
C17orf102	0.200036	4.36355	0.00771524	0.0449484
ISLR2	0.199613	6.20512	0.000847321	0.00904003
KGFLP2	0.199373	7.15311	9.66535e-05	0.00186732
C16orf74	0.198971	7.67857	0.00247342	0.0194721
PTPN22	0.198834	7.33454	0.00228478	0.0183609
HOXC12	0.198817	3.93395	0.008293	0.0472412
C7orf74	0.198514	10.6991	0.0333303	0.125858
MGC45800	0.198439	4.53004	0.00263097	0.0203246
PDE3B	0.19839	8.80893	0.0028368	0.0214607
BCL11A	0.198179	6.76174	0.00034792	0.00471833
GGTA1P	0.197744	11.2704	0.000752443	0.00832586
DCUN1D4	0.197685	8.72168	0.000248277	0.00369933
RAB33A	0.19734	8.51032	0.00295712	0.0221138
MBD4	0.197278	9.39204	1.76685e-05	0.000555435
ADH1B	0.197264	10.1269	0.00426434	0.0288902
SPCS3	0.196907	11.7345	0.000890237	0.00933777
ADAM8	0.196588	12.99	0.00513456	0.033027
FAM155A	0.196456	9.13826	0.0303912	0.118038
MGAT4A	0.196451	10.1454	0.00209631	0.0172896
CCL26	0.196445	5.70092	0.0367006	0.13468
SLC30A2	0.196207	5.96767	0.000430549	0.00554868
PRAM1	0.196177	11.8516	0.0253194	0.103728
VAV1	0.195908	11.1868	0.000187835	0.00304483
FAM65B	0.1955	8.73134	0.0126992	0.064291
RPS7P5	0.195427	13.0643	0.00211997	0.0174412
JMJD5	0.194917	9.91355	0.000193685	0.00311385
CD209	0.194441	7.29125	0.00714612	0.0423126
SYTL2	0.194413	9.58244	0.00412942	0.028206
PIK3R6	0.194283	5.99759	0.000750437	0.00831636
C18orf12	0.194119	9.29915	3.81654e-05	0.000954311
SCG2	0.194107	5.69791	0.0399117	0.142334
SASH3	0.194054	10.1156	0.000989862	0.0100907
ARAF2P	0.193991	14.6532	0.00260412	0.0202017
ESR2	0.193805	5.13828	0.00871482	0.049013
ATG4C	0.193716	7.02334	0.000227405	0.00346184
WFDC3	0.193322	8.63715	3.52295e-05	0.000901626
DOCK11	0.193307	10.9297	0.00296785	0.0221712
GCNT1	0.193244	8.17673	0.00845032	0.047847
MGC16075	0.193201	4.08067	0.023532	0.0986538
TNFAIP8L2	0.193184	9.28917	0.00203531	0.0170031
COL6A3	0.193164	8.85933	0.0125622	0.0638201
LPCAT2	0.193124	7.04715	0.000708694	0.00797341
CKLF	0.193106	10.2734	3.4663e-06	0.000164491
VASN	0.192966	12.8717	0.000798733	0.00867914
ITGA7	0.192773	12.1395	0.0348907	0.130124
DGAT2	0.192754	7.42356	0.0281085	0.11188
FCER1G	0.192434	9.83107	0.0011264	0.0110776
ICOSLG	0.192194	7.92328	2.9429e-06	0.000147241
NR1D2	0.192142	7.48595	0.0161925	0.0763276
DKFZp686D0853	0.192075	4.34802	0.0336485	0.126796
MS4A6A	0.192069	9.85159	0.00775587	0.0451126
LOC729080	0.191962	6.82159	0.000377884	0.00501792
P2RX1	0.191955	7.70115	0.00080161	0.00870555
PGAM4	0.191775	13.1436	0.00600758	0.0371909
LOC100129034	0.191706	9.33734	3.91785e-05	0.000970719
LOC100335030	0.19161	5.53558	0.000296114	0.00416666
RAB44	0.191574	6.9978	0.00284074	0.0214649
WDTC1	0.191559	8.81658	0.00868433	0.0489174
SEC24D	0.191439	9.1363	0.000118008	0.00215546
RNASE3	0.191344	4.91123	0.00213602	0.0175215
TRIM23	0.191281	6.68572	0.00220073	0.0178904
HVCN1	0.191022	9.06147	0.00638315	0.0389397
NDUFA3	0.190993	12.2226	0.00037624	0.00500595
SLC16A14	0.190864	6.69059	0.00840766	0.0477047
HPGDS	0.190763	10.0631	0.00369878	0.0259811
PDE6G	0.190741	8.827	0.0229708	0.0968425
HPSE2	0.190727	5.44156	0.00938314	0.0515789
LCE1D	0.190712	15.411	0.0174403	0.080538
RNF166	0.190678	7.63782	0.00103602	0.0104449
C9orf53	0.19065	5.46646	0.00336681	0.0242201
FLJ42709	0.19056	7.35583	0.000142847	0.00249269
IQGAP2	0.19053	11.4005	7.50331e-05	0.00155011
ECEL1	0.190277	4.92929	0.0102796	0.0550661
GNG10	0.190173	12.2286	9.88527e-06	0.000350924
OR10A6	0.190123	4.64512	0.00577102	0.0360444
TTYH3	0.1899	9.17994	0.00431284	0.02911
TNPO1	0.189892	9.47631	1.91943e-05	0.000588104
LOC645431	0.189638	6.2482	0.00638178	0.0389397
PACSIN1	0.189592	7.97138	0.0420711	0.147378
PAX4	0.189544	5.79174	0.000304225	0.00424782
C21orf58	0.189535	8.13812	0.00166573	0.0147722
RAC2	0.189523	10.5295	1.9799e-05	0.000600708
KCNC3	0.189366	7.40459	0.0197228	0.0874183
TRPM2	0.189286	8.44129	0.0259609	0.105581
CORIN	0.189254	5.82925	0.00557473	0.0350985
MMP2	0.189234	9.75224	0.00239193	0.0189586
C4orf48	0.189043	10.6871	0.000650448	0.00749462
GK	0.189012	6.77748	0.00103479	0.010441
LOC100131289	0.188874	5.6389	0.0176787	0.0812728
CELA1	0.188626	4.82244	0.0177543	0.0815342
LILRA2	0.188622	7.8624	0.0200268	0.0884417
APBB1IP	0.188189	9.97965	0.00046473	0.00586072
PVRIG	0.188175	10.1846	0.0134773	0.0670163
NME1	0.188166	12.5804	3.69522e-05	0.000935807
ABCA4	0.188109	5.81923	0.00479648	0.0314759
EMILIN1	0.188092	14.2311	0.000687674	0.00782856
CLDN14	0.187936	5.57035	0.0451707	0.154942
TMEM167A	0.187916	9.1516	5.15638e-05	0.001187
MRVI1	0.187832	11.5145	0.0149877	0.0724058
CLNK	0.187557	5.2846	0.0207448	0.0906796
DFNA5	0.187426	7.33225	0.0157199	0.0748294
CD248	0.187238	9.22227	0.0332227	0.125604
PUS7L	0.187084	4.23625	0.00148722	0.0136453
FTHL17	0.186944	13.4295	0.00524083	0.0334828
SLC16A1	0.186751	6.588	0.00184796	0.015877
CLECL1	0.186739	6.16372	0.0435092	0.150861
HSD17B14	0.186699	8.02821	0.00115791	0.0113007
EPHX3	0.186686	11.6166	0.00161374	0.0144762
HSPA13	0.186438	9.71364	0.00125495	0.0119943
RRP7B	0.186367	10.7236	0.000931905	0.00963529
BCL2	0.186345	8.88656	6.09673e-06	0.000246771
LOC255025	0.186334	3.86488	0.0193439	0.086125
CENPK	0.186317	5.78829	0.0141525	0.0692004
CCR1	0.186239	11.0994	0.0299144	0.116791
FBN1	0.186039	8.47877	0.00421305	0.028623
KLF16	0.18597	12.0491	0.000183618	0.00300559
SLC39A10	0.185951	8.06976	0.000228127	0.00346555
SRM	0.185949	10.2995	5.87608e-05	0.00130437
PNLIPRP2	0.185871	4.49879	0.00172001	0.0150997
CEACAM20	0.18522	7.3225	0.00219016	0.0178245
CD3G	0.184953	9.18549	0.0307283	0.118944
HCLS1	0.184924	13.8228	0.000178298	0.00293174
CAPZA1	0.184885	11.4027	4.01698e-05	0.000988523
LEPREL2	0.184794	12.384	0.00168693	0.0148935
FBLIM1	0.184625	8.46431	0.00275508	0.0210147
MAN1A1	0.184538	11.0928	0.000778303	0.00852086
LOC100129324	0.184533	7.24904	0.00398733	0.0275017
NLRC3	0.184508	11.5783	0.00169887	0.0149485
RUNX2	0.184225	6.64217	8.69126e-05	0.00172501
SERPINB9	0.18405	10.9287	0.0416638	0.146409
TRPC4	0.183988	5.84069	0.0160833	0.0759663
RBP5	0.183903	6.98219	0.0103143	0.055184
GSDMC	0.183818	4.53291	0.0146287	0.0709866
FLT3	0.183625	6.31771	0.0287585	0.113583
UCK2	0.183579	8.93806	0.00646515	0.0392638
PCP4L1	0.183579	8.66127	0.0491486	0.164298
LOC1720	0.183466	4.42723	0.00253934	0.0198351
CECR7	0.183273	5.25287	0.00679811	0.0407849
AHSA2	0.183262	9.53752	1.62073e-05	0.000523885
NAT8L	0.183131	7.45313	0.00219305	0.0178372
CATSPER1	0.183112	7.50166	0.0103736	0.055433
CNTNAP2	0.183053	4.60735	0.000829797	0.00890108
MEG3	0.182964	10.0365	0.000308043	0.00429562
LILRA1	0.182894	7.2584	0.000308679	0.00430173
TAF1D	0.182771	9.84872	0.000485836	0.0060671
TNFAIP8	0.182631	9.26281	0.000258163	0.00378863
ZMAT3	0.182529	6.53824	0.00137494	0.0128591
RNFT1	0.182484	8.82407	0.000819844	0.00882915
MAGEL2	0.182474	6.90288	0.0026042	0.0202017
RRM2B	0.182322	7.77988	9.80135e-05	0.00189024
LOC729681	0.182239	4.26931	0.000537572	0.00654305
TMEM151A	0.182165	6.80983	0.00172493	0.0151185
CECR1	0.182074	11.6273	0.00849238	0.0480227
LOC100129129	0.181994	7.15659	0.00268563	0.0206224
MXRA8	0.181887	8.42615	0.00200156	0.0168246
SLC2A4	0.181835	5.70252	0.0185623	0.0839093
C19orf29	0.181823	11.3229	0.00323071	0.0236142
LOC100130654	0.181754	9.52692	0.000197231	0.00314541
RPP40	0.181657	8.64768	8.03249e-07	5.82463e-05
TGFB3	0.181548	9.99522	0.036329	0.133799
TMEM144	0.181362	8.04459	0.0033413	0.0241644
TG	0.181203	6.98224	0.00808216	0.046427
RPL22L1	0.180857	12.7196	0.000116955	0.0021411
HLA-DMB	0.180816	13.854	0.00522861	0.0334342
ZNF708	0.180801	4.96247	0.00746103	0.0437132
IER3IP1	0.180787	10.9165	0.00129524	0.0122462
LOC400968	0.180681	8.74914	0.00631053	0.0386593
LOC100133669	0.180406	5.68083	0.0121283	0.0621088
TTC22	0.180396	5.95733	0.0115323	0.059833
LOC283484	0.180328	4.6635	0.00689177	0.0411878
PRDX4	0.180176	11.3897	3.23385e-05	0.000846384
LOC100130417	0.180101	5.71624	0.001896	0.0161811
RPSAP52	0.179991	12.424	1.62192e-07	1.80017e-05
SERPINA2	0.179974	6.05329	0.0188263	0.0847573
BST1	0.179916	9.74161	0.000697969	0.00790402
TM9SF3	0.179823	10.5266	4.45277e-05	0.00107335
FAM5B	0.179784	4.16436	0.00168332	0.0148797
HSP90AB6P	0.179774	4.91152	0.00225906	0.0182013
RABEPK	0.179716	9.64237	0.00375807	0.0263028
PGM2	0.179713	9.62191	2.62743e-05	0.000735614
FGFR1OP2	0.179546	8.34676	6.10291e-06	0.000246771
PTK2B	0.179403	11.5624	7.55006e-06	0.00028714
MSMP	0.179208	6.26308	0.0322944	0.1231
TSHZ2	0.179125	6.89874	0.0214856	0.0929037
LOC100128714	0.179104	7.77034	0.000995689	0.0101311
ADH4	0.179036	4.75167	0.00216048	0.0176357
NFKBIE	0.178962	10.9501	0.0103507	0.0553239
CD164	0.178948	10.4062	2.16043e-05	0.000642927
DEFB109P1B	0.178946	5.01967	0.0165649	0.0775295
LOC100132724	0.178652	8.86142	9.57174e-05	0.00185417
LOC100129722	0.178617	11.4398	3.73427e-05	0.0009435
C6orf27	0.178604	8.96814	0.000705321	0.00795359
SUSD3	0.178447	11.1859	0.00864724	0.048764
SPINK6	0.178402	5.08549	0.018447	0.0835877
MAP1S	0.178182	14.4056	0.00218169	0.0177755
CTSL1P2	0.178175	10.8513	0.00135491	0.0127113
C17orf87	0.178133	7.79383	0.0181966	0.0828655
NFKBID	0.17809	6.75079	0.0351912	0.130886
SLC43A2	0.178071	10.7142	0.00181182	0.0156701
KREMEN2	0.177866	4.91923	0.0402909	0.143334
C9orf30-TMEFF1	0.177813	6.89458	0.0087479	0.0491228
SPRY1	0.17737	10.8453	0.00203613	0.0170035
HOMER3	0.177313	11.8545	8.70565e-05	0.00172501
IFIT1B	0.177251	5.23445	0.0275262	0.110379
RPL29P2	0.177228	11.2672	3.63536e-08	5.99119e-06
LIPK	0.177148	4.00773	0.0108884	0.057478
NLN	0.176922	7.25898	0.0181478	0.0827648
TRAF3IP3	0.176896	9.01439	0.00516282	0.0331388
CDH7	0.176829	4.79808	0.00105647	0.0106105
CBS	0.176782	11.5312	0.0114439	0.0595434
MAN2B1	0.176735	10.9161	0.00249541	0.0195905
HCST	0.176516	12.594	0.00287659	0.0216756
CRNKL1	0.176469	7.40141	0.000150031	0.00257802
CLMP	0.176466	8.7252	0.0104733	0.0557056
TRH	0.176343	4.95752	0.0316814	0.121316
TATDN1	0.176146	8.70497	0.000507265	0.00627235
ARL4C	0.176078	11.7032	0.00574807	0.035963
VENTX	0.17594	7.04535	0.00386559	0.0268696
CMTM7	0.175847	10.8114	2.38155e-05	0.000687484
LOC646576	0.17577	6.80043	0.0375457	0.136835
SNRPD2P2	0.175731	9.34091	3.50916e-05	0.000899156
PNMA2	0.17568	8.03587	0.00232815	0.0185655
AGAP2	0.175582	7.382	0.000814809	0.00878797
DOK3	0.175497	9.38393	0.000277044	0.00397023
FAM53A	0.175415	5.0041	0.0049524	0.0322559
LSAMP	0.175386	8.92664	0.00201602	0.0169084
CNFN	0.175044	7.99398	0.000132857	0.00234591
CLIP3	0.174855	8.34202	0.000969668	0.0099407
NCBP2	0.174539	9.62186	0.00299384	0.0223347
LOC643802	0.174437	6.91167	0.0257975	0.105095
C10orf58	0.174303	9.59141	0.000530127	0.00647886
SLC2A5	0.174245	6.19172	0.0011023	0.0109395
LEF1	0.174177	10.7016	0.00356622	0.0252702
C18orf56	0.174146	5.16732	0.014857	0.0719019
CBLN2	0.174062	4.53337	0.0276792	0.110768
CYSLTR1	0.174052	7.26948	0.000369429	0.0049395
PTGFRN	0.174009	9.83859	0.0137817	0.0679834
RECQL	0.173977	7.44149	0.000291972	0.00412438
TM6SF1	0.173895	8.07189	0.000631495	0.00734628
CTXN1	0.173607	10.511	0.0334289	0.126186
PTPN6	0.173584	10.5649	0.00377136	0.0263716
ADAP2	0.17346	11.4906	0.00809244	0.0464616
LOC100128242	0.173374	6.74825	0.0392698	0.140946
MGAT2	0.173283	10.4951	1.15821e-06	7.612e-05
ZNF215	0.173083	6.14804	0.0198119	0.0876813
SIGLEC8	0.172801	6.38623	0.0170016	0.0791298
EIF4EBP1	0.172772	9.82547	0.000956263	0.00982179
CPA4	0.172769	4.52565	0.0210646	0.091703
RABGGTB	0.172709	9.8185	0.000176881	0.00291285
IGFBP4	0.172701	11.1039	0.00394463	0.0272937
TMX3	0.172631	11.4056	0.00296304	0.0221505
EMB	0.172445	8.90836	0.020344	0.0894666
SESN2	0.172406	8.7421	0.00056521	0.0067262
TLR2	0.172158	11.5364	0.00462943	0.0306571
DIRAS3	0.172034	7.47715	0.0330779	0.125227
CALD1	0.172	13.5204	0.0209231	0.0912146
TLR8	0.171824	7.78711	0.0335865	0.126606
NMB	0.171797	11.8683	0.0193373	0.086125
ACTN3	0.171791	7.58787	0.000120672	0.00219124
STEAP2	0.171626	6.28518	0.00492219	0.0320975
ZNF92	0.171601	8.84503	0.00344125	0.0246415
STYX	0.171498	9.80368	6.94847e-05	0.00145904
ADRBK1	0.171392	12.1506	2.00329e-06	0.000110536
KCNH3	0.171362	11.584	5.95948e-05	0.00131617
PRRT1	0.171279	7.53399	3.38275e-05	0.000877097
P2RX5	0.171207	6.44482	0.0175546	0.0808639
CDKN3	0.171135	6.63013	0.0289276	0.114126
TMED7-TICAM2	0.170917	8.16467	0.000135266	0.00237496
PTGFR	0.170896	7.24951	0.02986	0.116641
RPS19	0.170825	14.2648	1.38035e-06	8.48491e-05
PTPRCAP	0.170682	8.06451	0.0322145	0.12286
CISD2	0.170659	9.56068	5.49388e-05	0.00124623
C2orf90	0.170547	3.9215	0.0148828	0.0720106
2022-09-01	0.170452	7.18095	0.0353155	0.131146
CSTA	0.170432	8.60418	0.00506442	0.0328063
DCLK1	0.170358	6.7533	0.03552	0.131723
TMED5	0.170281	10.1313	0.000235623	0.00356449
YIPF4	0.170173	8.44933	0.000321275	0.00442903
TLN2	0.169973	10.1484	8.33377e-06	0.000308846
SKAP2	0.169917	12.742	0.000321871	0.00443444
SLC8A3	0.169817	6.20923	0.0078733	0.0456127
TXNL4A	0.169799	11.53	0.000133875	0.00235815
CYTIP	0.169494	10.864	0.0428524	0.149202
ZCCHC24	0.169465	10.4066	0.000402658	0.00527359
PYGL	0.169405	10.5643	0.000100496	0.0019194
GABRG2	0.169315	6.50349	0.00330664	0.0240095
LOC283028	0.169306	6.1088	0.0252266	0.103465
GNB4	0.16916	12.2441	0.000213423	0.00332623
HOXC11	0.169092	4.25455	0.00445685	0.0298321
ATP11C	0.169053	7.34954	3.18536e-05	0.000841973
KCNK15	0.168999	10.1664	0.000146595	0.00252897
VWA1	0.168981	8.81918	0.00350313	0.0249345
CD68	0.168969	12.776	0.04603	0.157122
TAGAP	0.168884	8.00135	0.0377991	0.137344
LPPR4	0.168826	7.49081	0.00823235	0.0470414
LOC388210	0.168741	5.49917	0.0194029	0.0863348
LOC388276	0.168727	4.55817	0.00623156	0.0382509
INTS2	0.1685	6.65215	0.00314335	0.0231327
COTL1	0.168435	14.2459	0.000562738	0.00671568
FAM129C	0.168082	5.59358	0.00996656	0.0539066
ARRDC5	0.168045	5.95727	0.00210669	0.0173463
2022-09-04	0.168025	8.75552	0.00275801	0.0210232
TMEM86A	0.167685	6.78853	0.0116768	0.0604368
CERCAM	0.167547	9.00693	0.0023088	0.0184661
CCDC169	0.167522	4.7334	0.0026565	0.0204709
OR4C15	0.167325	5.73194	0.00174794	0.0152587
ID2	0.167276	12.0644	0.000857464	0.00910804
KISS1R	0.167128	4.34238	0.0030981	0.0228902
LOC100127888	0.167024	8.08512	0.00150513	0.0137565
RPRML	0.166962	5.42643	0.021273	0.0923801
FLRT2	0.166953	7.08874	0.0483354	0.162442
SMOX	0.166909	7.57387	0.0109181	0.0575788
CD200R1	0.166865	5.42045	0.00511717	0.0329724
ZNF675	0.166743	9.09019	0.0128207	0.0646503
MGC4473	0.166668	8.22892	0.00494614	0.032244
ERI1	0.166596	9.02887	6.53548e-05	0.00140063
MIS18BP1	0.166578	8.38055	0.013115	0.0657232
TAS1R3	0.166538	7.62253	0.00490668	0.0320156
GPC6	0.166527	7.5647	0.0154835	0.0740446
LIPC	0.166433	5.67468	0.0105702	0.0561522
PC	0.166404	9.30627	0.00157161	0.0142098
PITX3	0.166199	9.98144	0.000191636	0.00309491
ACE2	0.166108	6.77653	0.00957413	0.05237
LOC100130458	0.166051	4.80743	0.0384014	0.138834
SEC22B	0.166022	10.4659	5.72571e-07	4.60106e-05
CYP7B1	0.165914	7.74159	0.0162378	0.0764914
HAL	0.16567	5.1279	0.0401841	0.143071
IRF8	0.165395	11.5618	0.00866437	0.0488303
C18orf32	0.165253	7.48676	0.0361263	0.133305
LOC730227	0.164742	4.73283	0.0310197	0.119625
RPS27L	0.164584	13.0919	1.94879e-05	0.000594585
TLR6	0.164039	5.98574	0.00825785	0.0471499
LACTB	0.164019	8.48978	0.00728933	0.0429968
LOC100128607	0.163974	5.01209	0.0133505	0.0665657
TCHH	0.163864	6.07001	0.0186553	0.0842008
KRT85	0.163819	7.2303	0.00976306	0.0530832
DCP2	0.163807	9.52708	0.000444848	0.00567912
BBC3	0.163786	11.8212	0.0051111	0.0329638
SMAD1	0.163682	10.3454	0.00335233	0.0241799
GPX1	0.163659	14.5543	8.67344e-05	0.00172312
GALNT1	0.163621	9.18582	0.00210196	0.017327
TMEM8C	0.163452	11.722	0.0217332	0.0935465
LOC100506676	0.163433	8.27684	0.00307937	0.0228008
OSTCP1	0.163318	10.3469	2.2121e-05	0.000651488
CA10	0.163279	4.47748	0.00631604	0.0386822
SLC47A1	0.163208	7.25075	0.0479538	0.161559
SMCHD1	0.163105	8.43956	0.00099625	0.010132
GAS7	0.163027	7.11675	0.00334272	0.0241666
PWRN2	0.162745	4.10424	0.00705849	0.0419082
COCH	0.162517	5.06371	0.00692311	0.0413066
WIPF1	0.162336	7.88278	0.00215179	0.0176037
AIFM3	0.162153	7.28198	0.00870973	0.048997
NCAM2	0.162139	7.58309	0.0156915	0.0747926
CDH11	0.161843	9.859	0.00085156	0.00906303
FTL	0.161829	15.8281	0.0112376	0.0587227
DCK	0.161785	7.14796	0.00324751	0.0237068
FRMD6	0.161643	7.92546	0.00938445	0.0515789
TMEM215	0.16161	4.7176	0.029802	0.116471
OR11A1	0.161572	7.15196	0.00475887	0.0313141
MR1	0.161561	9.3061	0.000809763	0.00876397
C15orf37	0.161555	6.13688	0.00881829	0.0493779
VIPR2	0.161538	5.81039	0.0259106	0.105416
E2F3	0.161458	8.85108	9.84816e-05	0.00189691
CLEC2D	0.161456	6.78559	0.000125192	0.00224706
SLCO2B1	0.161384	12.5093	0.00274073	0.0209273
C20orf144	0.161342	6.60388	0.000607491	0.00713188
PLA2G4A	0.161155	8.15332	0.00327181	0.0238283
NLRP12	0.161142	7.61931	0.0437094	0.151396
ARRDC4	0.161125	10.9468	0.0072985	0.0430159
ADORA1	0.161095	6.3645	0.0394925	0.141299
RAB3A	0.161088	6.91801	0.0187257	0.0844266
ANKRD30BL	0.161052	5.98595	0.0292087	0.114867
CD33	0.160987	10.6053	0.00821272	0.0469415
LRP1	0.160969	9.56343	6.00034e-05	0.00131983
IKBKE	0.160794	6.19288	0.00504719	0.0327263
SEL1L3	0.160515	12.4028	0.00114564	0.0112212
LOC283270	0.160514	8.64323	0.0203978	0.0896252
KLRK1	0.160229	6.83084	0.0420268	0.14727
CTSC	0.16022	10.4547	0.00203373	0.017003
CBFB	0.160196	10.5457	1.67857e-06	9.66024e-05
CD300LF	0.159955	9.62758	0.0430994	0.14975
CHST8	0.15992	7.017	0.0067325	0.0404694
TMEM156	0.159887	5.02184	0.0178822	0.0819486
CTBS	0.15971	9.44397	0.000927578	0.00959968
IFITM4P	0.15951	13.3217	0.000241235	0.00362377
PYCR1	0.159492	7.12026	0.00423552	0.0287576
TOR2A	0.159294	11.2571	0.00714928	0.0423199
C1orf186	0.15926	10.7741	0.00204922	0.0170481
RAB18	0.159142	9.37611	0.00373523	0.0261743
IL4	0.159089	4.84323	0.0279858	0.111564
C14orf129	0.159003	10.3129	0.00890816	0.0497403
NAA25	0.158961	8.21958	0.00208159	0.0172075
SELP	0.158933	9.36293	0.0304335	0.118126
P2RY13	0.158833	6.23403	0.0337084	0.126928
TRIM59	0.158763	7.01704	0.00907438	0.0503967
ZBTB33	0.158579	8.98091	0.00332095	0.0240813
WDR93	0.158482	7.75283	0.000731447	0.00816414
TMEM182	0.158428	7.18455	0.000192862	0.00310687
RLTPR	0.15834	8.35002	0.00280188	0.0212747
PLEKHA4	0.158296	12.229	0.0116151	0.0601895
MYO7A	0.158142	6.76276	0.0409549	0.14481
DGKI	0.158136	4.40364	0.0138356	0.0681182
MYO1F	0.15806	12.4207	0.00407906	0.0279571
LOC729173	0.157784	6.55222	0.00663728	0.0400631
ARHGAP22	0.157554	9.90278	0.0309723	0.119517
NKX2-3	0.157508	8.26651	0.00272586	0.0208503
HNMT	0.157343	7.6893	0.000106291	0.00199849
GMPPB	0.15711	9.17394	0.00149612	0.0136981
RALGPS2	0.156998	5.4479	0.00495029	0.0322518
KIF1A	0.156989	5.44822	0.0495074	0.165131
HNRNPCL1	0.156885	7.12899	0.00111941	0.0110339
MAF	0.156871	11.5779	0.00325444	0.0237415
UNC79	0.156814	4.19901	0.00774834	0.0451003
ZNF85	0.156658	9.42692	0.0143729	0.0700576
TLR9	0.1566	5.70149	0.000739526	0.00822477
MILR1	0.156517	7.28335	0.0285582	0.113058
HCK	0.156412	11.1459	0.0226039	0.0958528
ZFYVE16	0.156316	8.87772	0.00249842	0.0195929
TRPS1	0.156309	8.46905	0.00168052	0.014867
PLEKHO2	0.156251	12.2035	0.001783	0.0154593
LOC440028	0.156225	5.17308	0.001583	0.0142772
FLJ16779	0.156113	4.44309	0.00502441	0.0325883
UTS2D	0.156066	5.52744	0.00708602	0.0420025
PCOLCE	0.156065	11.1227	0.015328	0.0734944
SLC33A1	0.155932	6.93757	0.000288708	0.00408623
PARP4	0.155884	7.65483	0.042327	0.147889
KBTBD8	0.155731	6.01842	0.00799941	0.0461361
PDIK1L	0.155726	7.14984	0.010985	0.0578616
CPNE8	0.155674	8.5179	0.0129906	0.0652651
C4orf52	0.155634	9.94684	1.38074e-06	8.48491e-05
PLDN	0.155542	12.4783	0.00292485	0.0219329
BICC1	0.155468	5.70308	0.0279569	0.111469
LIPN	0.155463	5.48468	0.0362111	0.133515
SALL4	0.155451	5.89774	0.0441079	0.15245
RELN	0.155382	5.68729	0.0334816	0.126276
LOC145757	0.155288	7.62643	0.00548048	0.0346376
GSTM1	0.155202	8.13138	0.00592728	0.0368195
CCNG1	0.155196	8.95474	7.21791e-05	0.0014997
DEPDC7	0.155045	6.47424	0.0113064	0.0589971
TTC39C	0.154998	8.84049	8.71039e-06	0.000319
ZNF844	0.154974	8.40513	0.0073766	0.0433587
RUNX1	0.154968	8.51988	0.010692	0.0566746
DRAM2	0.154917	10.7134	8.35762e-05	0.00167414
ZNF277	0.154741	9.64639	0.00646384	0.0392638
MAP4K1	0.154568	8.3972	0.0160023	0.0757101
PTGER4	0.154429	11.3275	0.00347042	0.024769
RPL18A	0.154405	14.0957	2.0216e-05	0.000611655
LOC100132339	0.154187	6.96111	0.000541428	0.00657267
ASGR1	0.15418	10.0613	0.00124224	0.0119047
SNAR-E	0.154115	5.95423	0.0106456	0.056484
IL1R1	0.154095	9.07639	0.0078465	0.045518
SLC34A1	0.154023	6.28271	0.0127605	0.0644962
TIGD3	0.153998	5.60106	0.0171658	0.0796217
GPX7	0.15393	6.90831	0.00481095	0.0315423
GM2A	0.153853	11.4398	0.0457942	0.156587
UFL1	0.153834	10.4771	0.0087696	0.0491939
NAIP	0.153765	10.2034	0.0282153	0.11211
CTDSPL2	0.153752	9.18227	0.00306907	0.0227643
CRELD2	0.153677	12.5427	7.07386e-05	0.00147969
SLC36A4	0.153573	8.16675	0.00723483	0.0427332
NDST2	0.153503	9.20605	7.80285e-06	0.000293674
OR5L2	0.153459	5.44795	0.00818993	0.0468605
LCE1C	0.153393	8.41025	0.0128815	0.0648667
RASGRF2	0.15326	5.43711	0.0234194	0.0983374
C1orf96	0.153127	9.44469	0.00926829	0.0511602
LHX8	0.153052	3.9839	0.0465776	0.158318
TAF10	0.152943	11.6743	5.3246e-07	4.35639e-05
LY75	0.152814	8.86582	0.0204104	0.0896623
CAND1	0.152739	8.92441	0.0119786	0.0615451
GPR88	0.152681	6.66498	0.00126197	0.0120407
ATP13A3	0.152502	9.40837	0.00928873	0.051234
INSIG1	0.152384	12.4084	0.019802	0.0876621
LIMK1	0.152212	7.77568	0.0116017	0.060134
RGS19	0.1522	12.073	0.00123494	0.0118609
CKMT2	0.152086	6.89025	0.0187509	0.0845034
C11orf87	0.152066	5.26465	0.023154	0.0974825
TLR7	0.152058	8.92872	0.0433369	0.150407
RNF138P1	0.152057	8.11811	0.00310257	0.0229102
DLEU1	0.151983	7.59836	0.00790442	0.0457514
HLA-DRA	0.151848	14.9585	0.0186722	0.0842555
SEPX1	0.151833	11.1684	0.00017165	0.00284858
EMX1	0.151575	7.59235	0.000829748	0.00890108
ENTPD1	0.151534	8.54457	0.0014504	0.0134049
CYBASC3	0.151382	10.6878	0.0028392	0.0214607
ADAM9	0.151359	6.05962	0.023625	0.0989485
PPIP5K2	0.151225	10.3155	0.00573448	0.0358883
SP140	0.151171	8.69047	0.00175379	0.0152936
PIK3AP1	0.151037	6.16555	0.00744239	0.0436158
RPS2P32	0.151021	14.6456	9.3946e-05	0.00182636
IDH1	0.150957	11.1651	0.0187764	0.0845832
SPRR2B	0.150925	4.07862	0.00959994	0.0524453
GNG7	0.15084	9.0675	0.00260871	0.0202017
OST4	0.150829	12.1172	1.04725e-05	0.000368045
GJB6	0.150712	4.21925	0.00689565	0.0411914
SPATA12	0.150696	4.40779	0.00546706	0.0345652
FBXW7	0.15063	11.1899	0.00064753	0.00747288
DCAF13	0.1506	9.41519	0.00289078	0.0217373
ISLR	0.150575	12.4306	0.0151407	0.0729541
ACTR2	0.150453	10.8341	0.000649634	0.00748921
SHMT2	0.150308	11.3012	0.000336593	0.00459651
MAP3K1	0.150126	12.6219	0.000550324	0.00663168
TBXAS1	0.150077	10.5159	0.0100895	0.0543795
ODF1	0.15007	3.91052	0.00453273	0.0301729
CACHD1	0.149955	7.27946	0.0384752	0.138965
TRPM7	0.149819	7.78352	0.00747284	0.0437589
NAA20	0.14963	11.3392	6.72922e-07	5.15449e-05
UQCRBP1	0.14959	4.13632	0.00181236	0.0156701
SNX31	0.149482	4.82529	0.0376948	0.137218
CD8A	0.149273	9.70513	0.0462653	0.157607
SEL1L	0.149191	8.62928	0.000318027	0.00439539
GSTM3	0.149081	12.2541	0.0176421	0.0811635
TTTY21	0.14903	4.06767	0.00476816	0.0313373
LST1	0.14897	11.3866	0.0143678	0.0700489
UBE2D1	0.148921	8.97289	0.000330058	0.00452717
HS6ST1	0.148824	12.2271	0.00167505	0.0148307
ITGAM	0.14879	10.2459	0.0374396	0.136678
PRSS23	0.148788	11.1558	0.0393941	0.141136
CAPZA2	0.148775	10.2438	0.00621141	0.0381488
CMAS	0.148567	8.72439	9.28046e-05	0.00181553
TRIM42	0.148547	4.92096	0.00501093	0.0325493
PTPN2	0.148478	8.04808	0.0104849	0.0557403
SRP9	0.148343	11.0166	0.000198086	0.00315228
CHEK2	0.148255	7.00938	3.763e-05	0.000948696
UBA3	0.148254	9.08694	0.00115996	0.0113017
MDFIC	0.148244	10.0243	0.00679809	0.0407849
PLSCR1	0.148217	11.4353	0.00533116	0.0339602
RCBTB2	0.148175	9.83323	0.00160489	0.0144208
DSC3	0.148157	4.51932	0.0226499	0.0960292
TBC1D3	0.148135	7.34154	0.00248843	0.0195498
CHST13	0.148038	8.84765	0.000299449	0.0041973
PRLHR	0.148008	8.39833	0.000212938	0.00332623
ANXA9	0.147932	5.69569	0.0170391	0.0792486
MOSPD2	0.147872	8.06514	0.0441295	0.152501
SYK	0.147827	10.2984	0.00748048	0.04378
LOC100129781	0.147771	5.34384	0.00638034	0.0389397
BLID	0.147573	5.33955	0.0345949	0.12922
LINC00494	0.147485	6.96204	0.00105268	0.0105872
C12orf45	0.147456	9.38576	0.000194265	0.00311655
LOC100129196	0.147406	8.10124	0.000863839	0.00914733
MAG	0.147388	6.85581	0.0214702	0.0928913
LOC284751	0.147118	6.17131	0.0237684	0.0993003
KDELR3	0.147101	8.32619	0.0332756	0.125742
AGPAT5	0.147084	8.48175	0.0153938	0.0737474
CNR2	0.147072	5.82908	0.0297617	0.116362
LOC285954	0.147062	5.02339	0.0189195	0.0849718
VPS26A	0.147032	11.0644	0.00150168	0.0137374
ASZ1	0.147015	4.90546	0.0171549	0.0795877
TAAR5	0.146923	7.43932	0.00196686	0.0166164
ASB10	0.146809	10.034	0.00053595	0.00653169
KCND3	0.146723	6.76763	3.11435e-05	0.000828761
ATF1	0.146304	11.0529	0.00739585	0.0434132
TARP	0.146291	9.07464	0.0190873	0.0854238
YJEFN3	0.146157	8.30734	0.0327298	0.124259
CCDC109B	0.14606	9.75147	0.00428848	0.0289906
C1orf68	0.145918	5.3472	0.00234808	0.0186834
PHGDH	0.145812	9.52807	0.032849	0.124581
NMUR2	0.145616	5.06126	0.000859589	0.00911726
MPHOSPH6	0.14551	8.68964	0.011874	0.0611956
LDHB	0.145416	13.8213	7.06451e-05	0.00147969
EML4	0.145405	12.6665	0.00374195	0.0261997
ASCL1	0.145393	5.21469	0.0212314	0.0922882
LOC645553	0.145371	11.3844	0.00135083	0.0126848
TBC1D10C	0.145224	12.8682	0.0093088	0.0512927
BIN2	0.145178	9.37217	0.00934787	0.0514429
SLC25A40	0.145017	5.84592	0.00318016	0.0233405
TFPI	0.144914	11.3004	0.0130882	0.0656793
OSTM1	0.144895	7.36194	0.00388392	0.026968
SGK3	0.144813	10.1307	0.0347838	0.129814
DIO3	0.144794	6.576	0.0417811	0.146598
OTOF	0.144763	10.4012	0.00163025	0.0145525
CHN2	0.144762	6.62804	3.92292e-07	3.46907e-05
IGFL2	0.144746	4.85135	0.0320889	0.122445
C17orf62	0.144735	9.9256	0.000153762	0.00262006
MYO16	0.144511	5.45716	0.00534412	0.0340228
RNF2	0.144349	7.87019	0.000351332	0.00475303
PARVG	0.144349	7.29811	0.00203758	0.017006
IVNS1ABP	0.144247	8.21574	0.00290989	0.0218433
LOC100128697	0.143894	4.60957	0.00320382	0.0234666
ANO8	0.143886	8.47054	0.0205096	0.0900073
SORBS3	0.143858	15.3341	0.01149	0.0596977
AP3B2	0.143548	5.13756	0.0137227	0.0678153
FLJ44087	0.143513	4.60179	0.04256	0.148421
PPAT	0.143334	6.86675	0.0179649	0.0822234
KIAA0748	0.143331	6.85558	0.0224908	0.0955222
SELM	0.143317	11.8486	0.00145043	0.0134049
NAV3	0.14317	7.04833	0.0020162	0.0169084
SNX8	0.143141	9.22236	0.00537042	0.0341503
GYPC	0.143029	11.2566	0.000142954	0.00249269
SLC30A6	0.142898	6.25771	0.00864814	0.048764
TRIM78P	0.142844	5.88056	0.0170535	0.0792867
TRAF5	0.142721	10.7153	0.0179793	0.0822648
OSBPL8	0.142372	7.15042	0.00413537	0.0282215
LOC728739	0.142237	7.24267	0.00393332	0.02725
KCNK13	0.142137	5.63681	0.0255389	0.104333
CISH	0.14206	11.4395	0.0271823	0.109301
SCN1B	0.142056	5.16999	0.00433482	0.029204
FNDC9	0.142035	7.62698	0.0453702	0.155406
GGN	0.141992	7.51186	0.0088529	0.0495137
PTGER3	0.141968	5.92705	0.0349291	0.130178
LOC100129250	0.141955	9.10192	0.001042	0.0104992
TTC35	0.141893	11.302	0.0208765	0.0910846
LITAF	0.141826	11.308	0.0176211	0.0810938
TGDS	0.141758	10.1283	0.00293825	0.0219954
B4GALT4	0.141742	9.15775	0.00203164	0.0169985
SEMA4D	0.141666	8.39021	0.00364048	0.0256461
ISL2	0.141392	4.28205	0.0329577	0.12495
RAB30	0.141351	6.28129	0.0379232	0.137675
HSD11B1	0.141347	11.1085	0.0219794	0.0942333
UCHL3	0.141298	10.2974	8.06068e-05	0.00163422
RPS12	0.141277	15.6627	0.000983301	0.0100426
RHOQ	0.141235	9.27022	0.000110289	0.00205943
TNP2	0.141153	7.82999	0.0395088	0.141301
GFRA3	0.140864	6.94653	0.0433065	0.150325
LOC652586	0.140429	6.89315	0.00395479	0.0273356
PGBD5	0.140423	5.98945	0.0210279	0.0915616
STK17B	0.140367	9.23857	0.0144845	0.0704938
DBX2	0.140359	4.03502	0.0388381	0.139858
GPR32	0.140223	5.43111	0.021604	0.0931348
PNMA6C	0.140131	6.85563	0.0223217	0.0950453
PHPT1	0.140069	13.2466	8.29938e-06	0.000308097
LOC285766	0.140055	3.93582	0.0326606	0.124126
AZI2	0.140022	9.48784	0.00243166	0.0192288
PYCARD	0.139988	11.8845	0.00766573	0.0447438
WDFY4	0.139867	8.49472	0.00329864	0.0239675
DLG4	0.139831	8.15486	0.00201866	0.016916
CHAC1	0.139666	6.56782	0.0181602	0.0827948
GRM4	0.139657	5.09346	0.0145559	0.0706948
STAMBPL1	0.139635	7.96343	0.0182162	0.0829376
CD3E	0.139616	6.56124	0.0318633	0.121783
LCE6A	0.139581	5.55823	0.000782621	0.00855105
NEGR1	0.139525	8.03711	0.000699876	0.00790914
C6orf115	0.139414	11.688	0.00297514	0.022218
COL18A1	0.139106	14.3492	0.0218298	0.0938139
SLC38A6	0.139073	9.22696	0.00212705	0.0174809
RAB7B	0.13894	10.4095	0.0353961	0.131423
LRRC58	0.138886	8.06853	0.011773	0.0608336
SUB1	0.138813	10.6312	0.00036372	0.00487815
SNORA28	0.138809	6.3453	0.0461011	0.157266
KNTC1	0.138795	7.72248	0.0250841	0.103133
CFP	0.138635	11.0403	0.0415604	0.146272
LOC728868	0.138583	4.76551	0.0106791	0.0566204
EEF1E1	0.138446	9.36212	0.000820532	0.00883218
LIME1	0.138419	8.30576	0.0047033	0.0310518
AASS	0.138405	8.41693	0.0235059	0.0985634
CD14	0.138316	14.7094	0.0185381	0.0838608
TMEM170B	0.13823	6.70904	0.00252636	0.0197673
ATP6V0B	0.138226	12.5476	0.000915773	0.00952282
SLC16A3	0.138217	13.8347	0.0158867	0.0753907
PPAP2A	0.138207	11.9814	0.000886843	0.00931999
MYBPC3	0.138173	7.85061	0.0335673	0.126555
GLB1L3	0.13812	4.77466	0.00255907	0.0199677
LRIF1	0.138017	7.08053	0.00345053	0.0246998
MAMSTR	0.137988	7.46798	0.0115049	0.0597605
S100A11	0.13788	11.8308	0.00409899	0.0280495
CLRN1-AS1	0.137771	7.08585	0.00594044	0.0368777
GPR137B	0.137592	8.82916	0.0087036	0.0489752
ATAD2	0.137491	9.07087	0.0368616	0.135203
ACADM	0.137468	9.17984	0.00970218	0.0528611
ZNF732	0.137305	8.21667	0.0100191	0.0540968
LMAN1	0.137296	5.68456	0.00150944	0.0137794
PDGFRB	0.13715	13.0521	0.00289957	0.0217959
OR2W1	0.13706	4.10506	0.0127582	0.0644962
MAP2K6	0.137033	7.65693	0.000920288	0.00956062
C2orf49	0.136983	8.23774	2.36744e-06	0.000125722
GLCE	0.136938	8.5002	0.000875983	0.00923372
SLC46A3	0.136903	6.64005	0.00516222	0.0331388
DAB2	0.136867	12.8151	0.00419229	0.0285175
PRELID1	0.13676	13.0006	0.000104936	0.00198119
WDR12	0.136628	9.21642	0.000807387	0.00875132
LHX3	0.136621	7.21897	0.00506556	0.0328063
DUSP23	0.136594	12.275	0.000248709	0.00370069
ARRB2	0.136441	12.0311	0.00246972	0.019459
FLJ40606	0.136283	10.2401	0.000795574	0.00865346
LINC00511	0.136217	4.33326	0.00903513	0.0502543
UGP2	0.136161	11.7371	6.69002e-05	0.00142402
KCNQ2	0.13613	8.21858	0.00128072	0.0121809
SPINK8	0.136063	4.78988	0.0320813	0.122438
SUSD1	0.135969	10.1611	0.00790843	0.0457514
SH2D1A	0.135817	6.65758	0.0312466	0.120222
GPR160	0.135781	9.61472	0.0364061	0.133984
LOC283143	0.135732	4.91858	0.0106052	0.0563111
CCBL2	0.135722	8.24261	0.00304743	0.0226501
FRMPD4	0.135703	4.73967	0.0154688	0.0739904
AADACL4	0.135595	4.72832	0.0193959	0.0863214
CRLF3	0.135384	7.13137	0.0037407	0.0261993
CPD	0.135326	9.57046	0.0131052	0.0656904
ZNF107	0.135196	7.7441	0.0292807	0.115018
HSF5	0.135125	5.10304	0.00340713	0.0244616
OMP	0.135023	6.14487	0.00061562	0.00720786
LOC100287221	0.134841	4.65582	0.0248673	0.10261
DTWD1	0.1348	9.06412	0.00501854	0.0325696
C9orf40	0.134709	7.47818	0.000121259	0.00219821
GNL3	0.134486	10.9431	0.0216338	0.0931924
FAM18B1	0.134451	10.6139	0.00670733	0.0403901
LOC400958	0.134361	4.39697	0.0356425	0.131993
ST8SIA4	0.134337	6.99581	0.00216343	0.0176532
LINC00324	0.13429	7.04125	0.0180399	0.082463
RBM7	0.134283	9.27495	0.00596392	0.0369918
KRTAP26-1	0.134203	5.09677	0.00223223	0.0180402
DLG2	0.134196	5.28672	0.00163118	0.0145548
SRPRB	0.134177	10.393	0.00313696	0.0231014
RFX7	0.134159	10.0505	0.00437225	0.0294015
PDE1B	0.134009	7.53647	0.00818523	0.046846
TSNAX	0.134004	8.97419	0.00563533	0.0353861
KLHL6	0.133967	10.0147	0.0464231	0.158017
SMC5	0.133958	6.12122	0.0473474	0.160086
ATP6V0E1	0.133812	13.3196	0.00015973	0.00269571
SUGT1	0.133801	8.1381	0.00928183	0.051209
TULP4	0.133716	10.4978	7.16288e-05	0.00149397
HOXA9	0.133676	6.73232	0.0228786	0.0965522
MS4A4E	0.133662	5.43383	0.0291606	0.114769
GLA	0.133512	12.2739	0.0123536	0.0629893
LOC100129597	0.133377	4.69804	0.00981582	0.0532768
ALDOA	0.133285	13.8734	0.000152689	0.00260927
KLHL14	0.133216	5.1641	0.00371189	0.0260563
SCOC	0.133203	9.40339	0.0145419	0.0706758
ZDHHC18	0.133118	8.28	0.00632459	0.0387133
VRK2	0.133109	7.92666	0.00484433	0.0317038
UGDH	0.133105	10.9768	0.00754569	0.0441156
NAP1L2	0.133005	7.76444	0.0310252	0.119625
HSD3B7	0.13284	9.29197	0.0330827	0.125227
FAM131B	0.132655	5.82897	0.0250046	0.10294
TOP1MT	0.132608	11.4971	0.000236489	0.00357449
SIRPG	0.132597	6.25931	0.00785935	0.0455607
RGS10	0.132512	13.235	0.0119115	0.0613161
SLC16A2	0.132403	9.14385	0.00862303	0.0486477
LOC285972	0.132363	5.86463	0.02461	0.101761
SETP20	0.132345	6.83186	0.0375424	0.136835
RPL29	0.13229	12.8455	1.10608e-06	7.3809e-05
R3HDML	0.132192	4.55389	0.0219696	0.0942285
CMTM6	0.132111	11.5538	0.000584086	0.00690554
TFAM	0.132061	7.89655	0.000461644	0.00583533
PLCB2	0.131802	12.7136	0.0189112	0.0849718
FBXL6	0.1318	11.5811	0.00402964	0.0277232
L3MBTL3	0.131772	7.77792	0.00618236	0.0380341
LAMA1	0.131701	5.83035	0.0480694	0.161788
GATM	0.131649	9.74904	0.032149	0.122632
LOC100130264	0.131638	6.03441	0.00408806	0.0279866
TGM2	0.131566	10.6759	0.0156527	0.0746403
FKBP4	0.131508	8.9124	0.000994844	0.0101311
RAP2B	0.131471	8.05386	0.0186562	0.0842008
TTF2	0.131406	9.38633	0.000471101	0.00592389
TAC4	0.13135	6.19272	0.0267267	0.107929
FUT7	0.131293	6.05689	0.0257601	0.105039
TRIM33	0.131252	10.3152	0.0474334	0.160239
CTTNBP2	0.131099	7.86076	0.0342756	0.128358
SLC27A5	0.131069	9.67449	0.001293	0.0122424
LBR	0.131069	12.6503	0.0001305	0.00231557
OR52N2	0.130727	4.30979	0.031766	0.121554
TNFRSF1B	0.130709	8.38605	0.0276329	0.110643
SLC2A9	0.130701	8.05274	0.021558	0.0930318
FADS2	0.130656	10.0166	0.00821154	0.0469415
HLA-F-AS1	0.130603	13.7029	7.27905e-05	0.00150952
PHLDA3	0.130595	11.0304	0.0152298	0.0732499
KIR3DL2	0.130593	9.86582	0.00214679	0.0175966
C17orf89	0.130586	11.8592	0.000812353	0.00877911
TIMM8A	0.130419	8.22246	0.000561563	0.00670931
HBZ	0.130396	7.05525	0.0171379	0.079543
OXCT1	0.130341	8.56774	0.00128359	0.0121905
CD72	0.13032	8.12188	0.0372534	0.136112
C10orf125	0.130311	9.39418	0.0174784	0.0806128
JAK2	0.129967	9.57733	0.0280522	0.111706
ARSB	0.129899	6.83962	0.028657	0.113286
NTRK1	0.129855	5.36477	0.0302935	0.117827
RB1	0.129757	11.7579	0.00569667	0.0356928
CSDE1	0.129729	11.9179	1.91317e-06	0.000106715
KBTBD11	0.129685	11.1702	0.0212223	0.0922882
ZNF479	0.129623	4.94598	0.0384625	0.138943
TRPC6	0.1296	10.3903	0.0421896	0.147582
GBGT1	0.129537	7.91744	0.000290581	0.00411007
HSH2D	0.129513	8.84169	0.0181699	0.0827948
LOC339524	0.129501	7.18804	0.008198	0.046882
SLC7A5P1	0.129384	9.40179	0.0034999	0.0249302
OR4X2	0.129359	5.03844	0.0136906	0.0677338
NAP1L6	0.129268	4.91562	0.0316978	0.121357
CEL	0.129191	6.01265	0.014362	0.0700359
XCR1	0.129079	7.1916	0.0024582	0.0193963
CSGALNACT2	0.128985	8.01803	0.0204507	0.089795
ARL6IP1	0.128928	10.3319	5.62034e-05	0.00126466
RWDD3	0.128887	9.51527	0.0227221	0.0962041
APOBEC3C	0.128879	7.83248	0.0207731	0.0907244
ZNF714	0.128874	9.58047	0.00331254	0.0240363
MTERF	0.128839	7.26957	0.0183005	0.083182
ACVR2A	0.128814	6.91577	0.000337522	0.00460342
WNT10B	0.128802	5.86247	0.0339046	0.127429
SH2B3	0.128595	9.46169	0.00268937	0.0206365
GPR97	0.128468	7.64894	0.0345531	0.129152
DNMT1	0.128169	9.70173	0.0164312	0.0772018
LOC100128035	0.128046	4.54615	0.00641003	0.0390275
CCL22	0.127924	4.36981	0.00888716	0.0496533
POU2F2	0.127572	6.23048	0.000410118	0.00534228
SNHG13	0.127539	8.41665	0.00215732	0.0176297
GCLC	0.127537	9.93295	0.0206694	0.0904529
TANK	0.127531	9.77341	0.0295162	0.115693
NUS1	0.127484	8.42415	0.00259643	0.0201796
PPP1R18	0.127369	8.85802	0.00432027	0.0291511
QSER1	0.127347	10.409	0.0166987	0.0780207
POLE4	0.12733	11.569	1.37211e-06	8.48491e-05
LOC154860	0.127314	6.55305	0.00501346	0.0325528
XPNPEP2	0.127245	4.94821	0.00463952	0.0306959
RGS17	0.127209	4.9375	0.0339882	0.127567
TSPAN11	0.127153	8.8157	0.0336969	0.126912
LOC440910	0.127124	4.68598	0.0189971	0.0851913
C19orf28	0.127052	9.45662	0.0390418	0.140335
RPS3	0.127029	12.8942	0.0109026	0.0575247
DEF6	0.126973	8.99155	0.00421251	0.028623
CECR6	0.126927	6.53934	0.0402287	0.143184
SLC25A13	0.126918	8.22955	0.000545648	0.00658853
OR6C74	0.126899	5.08108	0.00553812	0.0349004
CNIH	0.126883	9.36896	2.76633e-05	0.000765836
HOXA10	0.126868	7.62289	0.0279366	0.111429
MTDH	0.126741	12.6496	0.000215798	0.00334364
NUPL1	0.126733	8.07221	0.0142407	0.0695382
RNF130	0.126526	12.4681	0.000370737	0.00494787
TGFBR1	0.126478	8.00264	0.00354293	0.0251379
LINC00173	0.126105	7.78008	0.0468686	0.158965
FERMT3	0.126082	9.89082	0.0315629	0.121087
KCNAB2	0.125996	6.83839	0.00672987	0.0404648
COL8A2	0.125981	9.30746	0.030001	0.117024
ACSL6	0.125929	5.46077	0.00510908	0.0329638
LOC100507507	0.125828	10.5297	0.0221779	0.094699
OR2H1	0.125695	7.46982	0.00713066	0.0422326
FBXO32	0.125673	10.1272	0.0400042	0.142594
MYSM1	0.12564	6.09669	0.0126138	0.0639779
BMF	0.125614	7.81867	0.0316026	0.121142
LOC647086	0.125569	8.95198	0.0416061	0.146314
ITPR2	0.125556	8.31173	0.00458585	0.0304613
EPB41L4A-AS1	0.125536	12.3501	0.0014485	0.0134031
SNX6	0.125512	11.091	0.00141154	0.0131113
MOSPD1	0.125441	7.33749	0.00566633	0.0355232
B4GALT2	0.12539	9.76745	0.00261064	0.0202035
EIF4E	0.125371	9.53608	0.0044115	0.0295741
SEC11C	0.125335	12.5815	0.00705854	0.0419082
NKAIN2	0.125307	4.63277	0.0106629	0.0565483
ITGAV	0.125191	11.7141	0.0160845	0.0759663
CEACAM18	0.125097	4.60651	0.0202188	0.0890542
CD300A	0.124987	9.4554	0.0316368	0.121231
NEU2	0.124895	4.48053	0.00034121	0.00463628
FGF13	0.12486	9.37953	0.0245337	0.101588
LRFN5	0.124855	5.06834	0.0176149	0.081082
CSRP2	0.124772	12.4922	0.048158	0.161978
KRT40	0.124762	4.30785	0.0251117	0.103188
SLC43A3	0.124716	9.70537	0.00729193	0.0430004
NPPA	0.1247	5.53827	0.00346284	0.0247368
FADS1	0.124562	11.2544	0.0296359	0.115995
LOC441025	0.124454	5.04504	0.0406122	0.144006
MANEA	0.124453	7.77198	0.0082574	0.0471499
PIAS2	0.124382	8.01073	0.00334763	0.02417
UFM1	0.124374	8.71617	0.000555261	0.0066662
HMGA2	0.124355	5.98459	0.00187203	0.0160268
LOC338739	0.124354	5.08981	0.0318462	0.121783
CD302	0.124349	10.247	0.00433262	0.0291982
SPI1	0.124343	11.2056	0.0437588	0.151505
MGC24103	0.12411	10.6628	0.0402476	0.143203
ABCG4	0.124023	5.21091	0.0462148	0.15753
DRD5	0.123919	4.65255	0.00149109	0.0136692
CEP112	0.123915	7.30562	0.0484216	0.162538
SPRR2F	0.123898	7.03934	0.0432697	0.15024
CASQ1	0.123887	5.46199	0.00674855	0.0405547
SLC25A30	0.12387	9.79376	0.00402518	0.0277013
DENND1C	0.123856	9.3216	0.017217	0.079808
RPAP3	0.123613	7.95252	0.0190063	0.0852151
PRSS56	0.123598	4.60616	0.020453	0.089795
C21orf7	0.123449	6.79429	0.00368065	0.0259038
SNCA	0.123395	9.77295	0.0239541	0.0998341
ZNF736	0.123325	5.57141	0.0125715	0.0638226
C1GALT1	0.123226	7.64224	0.0242261	0.100633
AIRE	0.123106	5.4758	0.00228708	0.0183658
KIAA1324L	0.123026	11.2884	0.0459649	0.156973
UHRF1	0.12302	6.62113	0.0461752	0.157469
FXR1	0.122883	10.9655	0.000821207	0.00883509
RAP2A	0.12287	9.81783	0.021868	0.093941
SLC22A18	0.122855	11.1538	0.00957999	0.0523758
MIR137HG	0.122835	4.20964	0.0236189	0.0989419
WNT1	0.12283	5.03426	0.00161438	0.0144762
FAM18B2	0.122759	10.1368	0.0139244	0.0684234
TMC6	0.12271	10.9391	0.00319493	0.0234195
KRTAP20-3	0.12259	4.63986	0.02053	0.0900422
LINC00355	0.122548	6.66007	0.0100766	0.0543336
C3orf80	0.122534	5.21755	0.04229	0.147849
ATG3	0.122506	10.9187	6.28615e-06	0.000252304
NPFFR2	0.122459	4.45153	0.0184488	0.0835877
FAM199X	0.122441	9.91972	0.00513288	0.033027
FAM65A	0.122413	12.7577	0.0201607	0.0888343
SUCLA2	0.122405	8.58867	0.0249086	0.102683
TRUB1	0.122363	9.35402	0.040832	0.144479
MYO9B	0.122238	11.0869	0.000654984	0.0075389
NKAIN4	0.122211	5.78765	0.00360612	0.0254782
LOC100289580	0.12205	6.98425	0.016813	0.0784533
LOC284798	0.121935	4.2186	0.0440481	0.152316
AKR1B1	0.121923	11.8112	0.0189622	0.0850698
MYL3	0.121882	6.15715	0.0104175	0.0556082
RNLS	0.121783	6.72925	0.00903388	0.0502543
MRPL42	0.12172	9.94749	0.00781463	0.0453574
ZNF155	0.121673	7.10671	0.00958698	0.052397
MUC6	0.121659	6.52129	0.0113483	0.0591592
ZNF581	0.121631	7.7317	0.00753318	0.0440647
DDX26B	0.121551	8.0086	0.0287476	0.113581
TCERG1L	0.121496	5.64767	0.0366792	0.13468
NIPA2	0.121187	12.0287	0.00173503	0.0151703
CACNA1I	0.121144	5.49274	0.00550551	0.0347352
ODZ3	0.121061	5.07914	0.00880484	0.0493153
SNX20	0.120918	5.95964	0.0350785	0.130488
DKFZP434F142	0.120864	10.9854	0.00228937	0.0183707
GOPC	0.12078	11.1147	0.0282439	0.112181
C12orf5	0.120777	8.36858	0.0480561	0.161788
CNTNAP4	0.120728	4.13431	0.00386353	0.0268693
HSPB6	0.120673	6.71466	0.00356339	0.0252584
PHTF1	0.120663	8.29335	0.0104328	0.0556082
SPAST	0.120589	8.53952	0.0192841	0.086034
ZNF680	0.120534	5.15674	0.0037591	0.0263028
HMG20B	0.120506	12.7246	0.00282347	0.0213939
ANKRD33	0.120487	7.95492	0.0139807	0.0686074
ZCCHC6	0.12038	7.70212	0.00426379	0.0288902
LOC648771	0.120348	15.0673	6.22923e-05	0.00135918
SMARCD3	0.120306	12.5029	0.00111578	0.011023
PGD	0.120285	11.2518	0.0435611	0.150992
KRTAP2-4	0.120283	9.24991	0.00707444	0.0419567
LOC100130927	0.120272	4.96965	0.00346305	0.0247368
NDUFA6	0.120269	11.5135	0.0122162	0.062412
NUFIP2	0.120261	10.4721	0.0266925	0.107811
NRIP1	0.120208	10.1708	0.0250991	0.103156
VPS29	0.120156	11.2126	5.18386e-05	0.00119081
MRPL23	0.120155	11.1881	0.000542556	0.00658241
FDXR	0.120069	12.1647	0.042322	0.147889
PAPD4	0.120052	10.3917	0.0407709	0.144381
LOC100652953	0.120033	12.7309	2.16889e-05	0.000644563
GPCPD1	0.119974	11.9926	0.0103781	0.0554433
MESP2	0.119925	7.14787	0.00815507	0.046756
IQSEC3	0.119837	7.23576	0.0260742	0.105963
KCP	0.11979	10.3138	0.0304355	0.118126
SRRM3	0.11978	6.06945	0.0137175	0.067805
RPL17	0.119703	13.9196	0.005157	0.0331223
PRKAG3	0.119665	9.95786	0.0175157	0.080745
PRND	0.119606	4.20205	0.0115331	0.059833
NHLRC3	0.119536	10.3184	0.00164955	0.0146646
NME2	0.119526	14.7906	0.00117792	0.0114497
HS3ST4	0.119475	4.51246	0.024151	0.100417
C17orf67	0.119449	6.50911	0.00531924	0.033914
UBR1	0.119362	10.6751	0.00699283	0.0416089
RASD2	0.11936	6.547	0.00417252	0.0284097
OR5K3	0.119276	4.8928	0.0290997	0.114649
PTPRC	0.11925	8.52425	0.0237883	0.0993454
ND4	0.119134	12.6436	0.00922426	0.0509559
RPSA	0.119126	14.0281	9.48955e-06	0.000338975
NGF	0.119092	5.94663	0.0469085	0.159028
STAT3	0.119083	8.7269	0.00439057	0.0294883
TRHDE	0.119075	4.25839	0.0356869	0.132097
CCT8	0.119028	12.3008	0.00319584	0.0234195
NAP1L1	0.118934	13.3254	0.00824752	0.0471157
LOC100130522	0.118865	6.81932	0.00288424	0.021715
KIAA1586	0.118854	4.9229	0.0137918	0.0680179
ASAP1	0.118726	9.33783	0.0313429	0.120465
LSM10	0.118686	10.5313	0.000192605	0.00310687
TMTC3	0.118664	7.91605	0.0139442	0.0685055
EXOSC5	0.118655	7.24251	0.0181031	0.0826299
FCAMR	0.118639	4.5223	0.0438046	0.151619
ZNF614	0.118549	7.98787	0.000952272	0.00979341
H2AFZ	0.118481	12.3225	3.29144e-06	0.000158762
KRTAP19-8	0.118465	5.75154	0.0144736	0.0704938
FAM173B	0.118381	7.88652	0.00563828	0.0353881
COL22A1	0.118324	4.70201	0.0137149	0.067805
PIEZO2	0.118286	6.70854	0.0369087	0.135304
SLC16A7	0.118261	5.3302	0.0185645	0.0839093
MBOAT7	0.118253	10.1489	0.00284464	0.0214869
PPM1M	0.118185	9.2295	0.00511106	0.0329638
LOC100506128	0.117935	4.05019	0.0460935	0.157266
MFGE8	0.117895	9.11089	0.0374773	0.136753
NOD2	0.11787	8.88235	0.0350014	0.130313
NLGN2	0.117862	9.15273	0.00929128	0.0512351
FGF16	0.117809	4.25033	0.0492008	0.16439
MRPL53	0.117757	12.2707	0.00012018	0.00218413
TMEM60	0.117683	10.0966	0.0118511	0.0611397
GNAI3	0.117648	9.54185	0.0245429	0.101588
IRAK4	0.117314	7.12744	0.0117623	0.0608114
LOC338758	0.117196	5.31076	0.0173502	0.0802374
C20orf3	0.117158	10.0121	0.00363839	0.0256396
C10orf128	0.117123	6.22733	0.00325184	0.0237304
CPPED1	0.116857	9.0974	0.00767839	0.0447817
C16orf87	0.116777	8.5046	0.0275225	0.110379
PRKCB	0.116646	9.20465	0.0155799	0.0743746
CDRT3	0.116643	7.53807	0.00259531	0.0201796
ZNF878	0.116618	5.07045	0.0385181	0.139074
HIST1H3D	0.116609	10.7184	0.0170774	0.0793636
ANP32E	0.116557	8.5171	0.00380297	0.0265388
DMRTC2	0.116489	4.09086	0.0172133	0.079808
CBWD5	0.116459	10.4767	0.00510326	0.0329523
DNAJA1P5	0.116441	12.1301	0.00803315	0.0462065
METTL11A	0.116434	10.0562	0.00137432	0.0128589
SAMD8	0.116407	6.6593	0.0213581	0.0926099
POGLUT1	0.11634	9.0699	0.0192115	0.0858341
OSTC	0.116336	11.8316	0.00112639	0.0110776
METTL21D	0.116317	8.60237	0.021889	0.0939941
LDHAL6A	0.116291	11.2057	0.013754	0.0679083
SLC2A1	0.11629	7.90603	0.0497234	0.165673
ZNF259P1	0.116202	7.67369	0.0128058	0.06459
GNB3	0.116169	6.43364	0.00230493	0.0184547
NUDT22	0.116126	11.144	0.00112521	0.0110776
ZNF766	0.116076	10.756	0.0180478	0.0824653
ROM1	0.116066	10.073	0.00680272	0.0407925
GHSR	0.116044	6.48141	0.0215006	0.092913
LOC100133985	0.115869	8.07673	0.00934418	0.0514356
POLB	0.11583	6.94882	0.000643028	0.0074367
PPP1R2	0.115768	9.0395	9.5516e-05	0.00185357
DPH3P1	0.115719	8.62461	0.0439621	0.152043
PSD3	0.115666	8.14018	0.0266683	0.107753
HTR3D	0.115656	3.9822	0.038234	0.138485
NANS	0.115635	12.3451	0.00406364	0.0278865
AP3S1	0.115538	11.2523	0.000404869	0.00529298
SLC35A1	0.115468	9.52531	0.0327203	0.124245
C6orf108	0.11534	12.2023	0.0135354	0.0672411
FLVCR1	0.115306	7.95351	0.0187798	0.0845832
TOMM5	0.115022	11.9335	1.11324e-05	0.000384405
LOC400943	0.115007	4.85539	0.0383857	0.138827
C6orf228	0.114806	7.17132	0.036427	0.134038
GATA1	0.114741	5.22458	0.0242494	0.100691
GNPDA2	0.114656	8.92979	0.0278121	0.111075
ITGA4	0.114648	8.4493	0.0319537	0.122037
LOC100287314	0.114564	9.49155	0.0110508	0.0580531
LTB4R	0.114546	8.06405	0.00580203	0.0362277
HSPA4	0.114526	10.3031	0.00930105	0.051276
C9orf16	0.114514	8.26037	0.00357329	0.0252837
HTRA1	0.114454	14.2501	0.0197213	0.0874183
IFITM2	0.114442	13.7004	0.0107413	0.0568767
SLC35G1	0.114367	5.33537	0.0495485	0.165217
P4HA1	0.114272	10.8432	0.000686824	0.00782856
LTB4R2	0.114207	7.66208	0.0246013	0.101761
RPE	0.114151	8.07696	0.00378342	0.026422
LOC407835	0.114007	11.8101	2.48005e-05	0.000708019
SEH1L	0.113975	8.54841	0.0149492	0.0722997
RNASEH1	0.113886	8.75716	0.000370428	0.00494677
IQCB1	0.113883	10.7306	0.0205663	0.0901468
LOC100652995	0.113836	5.87963	0.013133	0.0657769
ZNF485	0.113798	6.23936	0.0140282	0.0687782
SEMA7A	0.113738	4.89018	0.0145309	0.0706383
LOC100134365	0.113723	5.39882	0.017151	0.0795869
USP14	0.11369	8.76803	0.00855726	0.0483393
SSR1	0.113644	11.1063	0.00121725	0.011739
P2RX3	0.113547	6.18589	0.0341139	0.127906
LOC149950	0.113467	8.17569	0.000579613	0.00687133
UBXN4	0.113431	9.29435	0.00892839	0.0498006
EIF3F	0.113364	11.1253	0.00012877	0.00229799
PPIB	0.113288	11.4767	0.00323156	0.0236142
EIF5AL1	0.113281	7.08838	0.0196533	0.0872169
KLHL2	0.113264	9.71191	0.0332122	0.125586
TBX1	0.113206	7.45974	0.0386529	0.139492
SEC23A	0.113047	10.2093	0.00213268	0.0175073
RAP2C	0.112972	7.86869	0.00588491	0.0366296
PRDM8	0.112966	7.16527	0.0159113	0.0754599
MTPN	0.112907	10.9128	0.000997783	0.0101429
LOC149837	0.11288	4.60213	0.0253688	0.103852
ATXN7L2	0.112776	7.95462	0.0339684	0.127559
CCNJ	0.112766	8.98084	0.0252422	0.10351
NSA2	0.112759	11.8016	0.0110892	0.0581847
C20orf197	0.112728	4.61197	0.014044	0.0688403
C3orf14	0.112677	8.92068	0.0137488	0.0678984
EIF4B	0.112546	10.7107	0.000143853	0.00249769
VEGFB	0.11251	13.4836	0.000620388	0.00724419
LOC644962	0.112475	10.2964	0.0232026	0.0976306
SFXN2	0.112401	7.28459	0.0424001	0.14803
CSF1R	0.112348	14.5033	0.035309	0.131146
NEUROG3	0.112343	9.37799	0.00804035	0.0462358
PPIC	0.112342	11.1188	0.0191619	0.0856653
NKIRAS1	0.112288	8.02195	0.00981169	0.0532696
SLC25A39	0.112192	10.7166	0.00120977	0.0117018
CHCHD2	0.112155	11.478	0.000489912	0.00609699
DYTN	0.112016	11.0178	0.0409815	0.14481
PRR13	0.111967	11.2554	0.00276576	0.0210667
EEA1	0.111951	10.5383	0.0202493	0.0891691
ARHGAP25	0.111913	12.1186	0.0131392	0.0657769
FGF4	0.111894	4.63644	0.027952	0.111469
RASGRP4	0.111841	7.59969	0.00909891	0.0504557
LOC390940	0.11184	8.37281	0.0169227	0.0788299
CACNG3	0.111805	5.71534	0.0140655	0.0688834
DDB2	0.11165	10.8494	0.0133979	0.0667689
ZNF157	0.111639	7.00015	0.00909053	0.050441
LFNG	0.111566	10.0867	0.0455707	0.156039
SH3TC1	0.111493	9.10052	0.015123	0.0728974
ITGAE	0.111453	9.86172	0.0125272	0.0636723
GABARAP	0.111438	12.5278	3.84171e-05	0.000957303
ANK1	0.111422	6.01769	0.0263628	0.106867
APH1B	0.111346	9.74107	0.0387701	0.139729
DCAF17	0.111294	9.14214	0.0413717	0.14582
CYB5R4	0.111195	9.16171	0.0100597	0.0542756
TBX10	0.111097	5.68257	0.0180481	0.0824653
ZNF217	0.111093	8.6511	0.000194991	0.00312358
2022-09-02	0.11099	9.95789	0.000296959	0.00417507
PLEKHA3	0.110869	9.60605	0.00100171	0.0101686
CLN6	0.110758	9.03876	0.0161213	0.0761075
POM121L1P	0.110735	6.36844	0.00126611	0.0120644
SRA1	0.110722	10.1331	0.00302688	0.0225348
CALML3	0.110718	8.97994	0.0132388	0.0661608
CAPN11	0.110585	4.47217	0.0462003	0.15753
PPPDE2	0.110528	8.57552	0.022224	0.0948147
INPP5D	0.110437	12.3588	0.0175949	0.0810071
C12orf42	0.110296	4.62602	0.00476462	0.0313373
C19orf22	0.110248	9.23416	0.036682	0.13468
IMPDH2	0.110218	11.3292	0.000544968	0.00658853
DPF1	0.110183	6.7659	0.00836363	0.0475418
MICB	0.110173	9.22137	0.0421257	0.147539
LIPT1	0.110171	8.538	0.0403875	0.14356
PTPRE	0.110145	10.9437	0.032704	0.124204
ZBTB7B	0.109886	7.83119	0.0105614	0.0561196
IPO8	0.109683	11.2798	0.0110788	0.0581584
PLD1	0.109511	7.09899	0.0194722	0.0865368
ELOVL4	0.109509	4.88129	0.00692681	0.0413066
SOCS5	0.109425	9.25332	0.0266382	0.107704
TPST1	0.109421	10.9756	0.0204288	0.0897251
TSPEAR	0.109375	5.04093	0.00549652	0.0346885
IBTK	0.109301	11.2567	0.0357746	0.132376
MDM2	0.109285	6.53161	0.0199518	0.0882179
IDH2	0.109278	10.5672	0.00982848	0.0533322
ACTN1	0.109245	12.2563	0.00963212	0.0525815
METTL8	0.109244	8.04101	0.00728644	0.0429914
NEFH	0.109204	7.18728	0.0499527	0.166105
TMEM138	0.109176	9.42566	0.00199686	0.0168045
RMND1	0.109112	7.47115	0.0305861	0.118562
LOC148145	0.109082	4.7279	0.0357719	0.132376
LOC646214	0.10888	10.452	0.0022157	0.0179742
PPP1R14B	0.108869	12.6417	0.000153338	0.0026183
PRR23A	0.108775	4.08142	0.0449634	0.154548
DHFR	0.108772	7.42962	0.0468996	0.159028
UBXN2B	0.108764	8.50024	0.0210226	0.0915616
CCDC88B	0.108748	9.09134	0.0134328	0.066869
ATP6V1B2	0.108746	11.5626	0.0174761	0.0806128
C7orf73	0.108708	10.4339	0.00880254	0.0493153
DPEP3	0.108645	8.34186	0.0310196	0.119625
SMOC1	0.108631	6.46311	0.0240391	0.100028
TMEM30A	0.108604	12.5744	0.0215217	0.0929856
USP48	0.108475	9.41947	0.00288629	0.021715
SSR2	0.108439	12.3565	0.00106159	0.0106325
LINC00322	0.108418	8.01506	0.0145061	0.0705647
NLE1	0.108364	8.67652	0.0031624	0.0232546
DOCK8	0.108239	9.21199	0.0120473	0.0617709
NHLH2	0.108186	5.87297	0.0309752	0.119517
NME4	0.108101	9.23219	0.00198748	0.016758
MAGOH	0.108047	9.74315	0.0304413	0.118127
MANF	0.107927	14.0303	0.00769175	0.0448476
GPSM3	0.107912	10.3732	0.00841322	0.0477114
ZNF222	0.107875	6.8054	0.041897	0.14691
LOXL3	0.107841	8.89066	0.0157425	0.0748879
ASS1	0.107837	10.1835	0.0138628	0.0682287
ZCRB1	0.107762	9.16549	0.00777525	0.0451811
PRDX2	0.107753	8.45608	0.00279754	0.0212571
ZNHIT6	0.107751	8.55209	0.0375204	0.13679
RAPH1	0.107617	10.0917	0.0144798	0.0704938
MTMR6	0.107533	8.63457	0.0133141	0.0664454
SDK2	0.107496	5.50351	0.0178402	0.0818595
PRAP1	0.107483	10.5327	0.0014645	0.0134898
LOC286186	0.107471	5.54442	0.0371695	0.135874
LOC84931	0.107458	8.52266	0.00199428	0.0167893
C16orf95	0.107452	9.72199	0.0102032	0.0548188
MRPS30	0.107357	7.61004	0.0442813	0.152904
LCE2C	0.107357	4.34117	0.031614	0.121165
LOC100287879	0.107258	6.48497	0.0203874	0.0895973
THUMPD1	0.107202	8.82954	0.0286573	0.113286
YIPF2	0.107128	11.3638	0.00247889	0.0194984
PAIP2	0.107044	13.0927	0.00405057	0.027832
NLGN1	0.107035	5.00343	0.0283998	0.112657
TMC8	0.10689	8.93323	0.0273817	0.109941
LIPM	0.106832	5.385	0.0221025	0.094546
LAT	0.106753	11.5558	0.0236312	0.0989553
FLJ43681	0.106744	13.7264	0.000194437	0.00311701
LANCL3	0.106483	8.83639	0.0445978	0.153656
NUDT1	0.106335	10.6292	0.00546003	0.0345457
INSIG2	0.106278	9.45905	0.0216302	0.0931924
LAMTOR3	0.106224	9.064	0.0197061	0.08738
C2orf69	0.106033	8.27688	0.013381	0.0667028
EIF2AK3	0.10597	8.20582	0.0246825	0.101984
FAM162A	0.105876	12.5921	7.19957e-05	0.00149732
KCNA2	0.105872	4.44264	0.0076716	0.0447562
CNPY3	0.105813	8.86117	0.00227402	0.0183015
ZNF259	0.1058	10.2456	0.010094	0.0543795
SNHG6	0.105755	13.0686	0.00471756	0.0311364
MYOG	0.105754	5.83673	0.0257815	0.105068
LOC100270679	0.10574	5.49825	0.0146039	0.0708821
OAT	0.105723	10.8809	0.002727	0.0208518
AMPD3	0.105635	7.89834	0.00874148	0.0491104
CHORDC1	0.105349	7.57589	0.0333739	0.126001
CKAP4	0.105346	10.2819	0.0404295	0.143571
CDC27	0.10534	8.56691	0.0101235	0.0544733
LOC100128348	0.105253	9.45937	0.00368475	0.0259167
BCKDK	0.105232	10.1584	0.00116045	0.0113017
RHOG	0.105215	9.88976	0.0129617	0.0651497
FNBP4	0.105043	11.5429	0.0324191	0.123467
psiTPTE22	0.104959	5.76563	0.0298778	0.11669
PAK1	0.104939	8.40233	0.00678457	0.0407486
ETNK2	0.104515	7.23918	0.0115353	0.059833
2022-03-07	0.10446	8.54428	0.0250087	0.10294
MEFV	0.104376	6.68921	0.0184064	0.0834888
ATL3	0.10413	8.4571	0.0123674	0.0630369
PUSL1	0.104108	10.0259	0.000489035	0.00609654
ANKRD34A	0.104101	4.6536	0.0452552	0.155178
GCK	0.104003	7.08258	0.0282207	0.11211
MEG8	0.103986	5.76002	0.0444945	0.153421
WAS	0.103895	7.63229	0.0139923	0.0686334
MRO	0.103822	4.36935	0.0326262	0.124039
ARHGEF10L	0.103768	11.3833	0.0337609	0.127043
SETDB2	0.103717	10.2205	0.0363848	0.133928
HLTF	0.103658	9.37766	0.0361048	0.133281
BEST1	0.103626	7.51612	0.0330448	0.125198
GML	0.103539	5.56097	0.00328638	0.0239069
[truncated: 4,546 more rows]

## Sheet: Table S2
Table S2. DEmRs in the GSE151052 dataset.
DEG	logFC	AveExpr	P.Value	adj.P.Val
CHIAP2	2.38054	6.5684	1.01106e-21	1.3747e-19
RTKN2	2.04461	8.91277	4.94966e-29	3.9033e-26
FOSB	2.02771	8.41973	5.53198e-12	8.13296e-11
HBB	2.0148	10.2495	3.13502e-16	1.09977e-14
APLNR	1.57644	6.23255	1.5354e-19	1.11288e-17
PTGS2	1.55063	8.05312	2.91223e-14	6.66837e-13
EGR1	1.50979	10.3202	7.64779e-14	1.60742e-12
AGBL1	1.50248	6.7467	1.8406e-17	8.51818e-16
MS4A1	1.38712	5.66887	5.01363e-11	6.10523e-10
LRRC36	1.3831	6.33628	2.45218e-26	8.95274e-24
TNR	1.32392	5.06693	1.1615e-14	2.89128e-13
CX3CR1	1.3045	6.43062	2.24273e-11	2.92044e-10
TRAC	1.28106	9.22305	1.24053e-13	2.49817e-12
FRZB	1.28075	6.08877	2.20547e-24	5.05591e-22
VCAM1	1.26791	6.10444	9.12463e-12	1.28128e-10
EGR2	1.26075	7.5845	3.16714e-13	5.87949e-12
ABCA9	1.25565	7.36146	1.50393e-18	9.01214e-17
CCL5	1.25225	8.32441	6.61193e-13	1.15358e-11
TRBC2	1.23219	9.86584	1.58544e-13	3.14058e-12
LRRN3	1.22644	6.61763	1.32157e-15	4.0095e-14
TRGV3	1.22339	5.32427	5.55653e-08	3.8424e-07
NCKAP5	1.21935	7.88797	2.12216e-28	1.54957e-25
GPR174	1.18143	6.45562	7.96774e-13	1.36502e-11
FLJ34503	1.16906	5.23341	4.0278e-13	7.35259e-12
ROBO2	1.16517	6.63912	4.21679e-27	2.18774e-24
EGR3	1.13448	5.94268	1.03341e-14	2.59869e-13
BMP5	1.12908	6.74107	4.84064e-22	6.96592e-20
GEM	1.11681	6.72137	1.50887e-21	1.94427e-19
TRPC6	1.10768	6.73948	5.17745e-34	1.45819e-30
CXCL12	1.10305	7.75003	3.47079e-20	2.96219e-18
C1QTNF7	1.09993	5.35186	8.76286e-38	1.7276e-33
SLC6A4	1.09533	9.10457	2.52588e-07	1.55424e-06
CORIN	1.09282	5.5756	7.19289e-19	4.54494e-17
ICAM4	1.09126	5.75131	3.96616e-11	4.93331e-10
COL6A6	1.07932	7.55257	1.35619e-14	3.32554e-13
CXCL10	1.0724	7.50502	0.000427916	0.00137939
CD1C	1.07181	5.72938	1.95651e-20	1.82809e-18
CXCL9	1.06979	7.32473	0.000288893	0.000967802
OGN	1.05859	6.22492	1.18303e-09	1.11542e-08
SGIP1	1.04408	7.37253	2.27586e-30	2.63933e-27
TNFSF10	1.04279	10.1039	3.83141e-12	5.77495e-11
ABCA6	1.04274	8.38353	1.7648e-14	4.23274e-13
BMP1	1.03367	7.642	1.52723e-11	2.05665e-10
IL6	1.03183	7.0182	1.07954e-05	4.83819e-05
MIR24-2	1.02934	5.47345	5.0673e-08	3.51767e-07
RGS5	1.02426	8.63732	3.56613e-13	6.54011e-12
PLEKHH2	1.02177	9.02353	6.49986e-20	5.14637e-18
GZMK	1.02108	6.10856	1.51373e-10	1.66266e-09
SEMA3D	1.01899	5.87477	1.59127e-18	9.3987e-17
ASPN	1.01748	5.49954	2.077e-10	2.23029e-09
NR4A3	1.01145	7.34595	9.9386e-10	9.47942e-09
ABCA8	1.00552	7.24036	2.08131e-24	4.82741e-22
MIR27A	0.99996	6.25827	3.94983e-11	4.91609e-10
GLT8D2	0.998747	6.18636	1.83583e-21	2.24803e-19
GSTM5	0.996428	6.85923	2.99313e-20	2.62265e-18
MS4A2	0.992994	5.39576	5.80337e-10	5.79015e-09
SLAMF7	0.992839	6.47416	2.72058e-08	1.99021e-07
IQCN	0.991278	6.93999	2.34341e-14	5.46104e-13
PCDH15	0.989847	5.22351	1.00672e-21	1.3747e-19
MFAP4	0.984951	10.0734	2.32541e-19	1.61428e-17
ABCA10	0.983206	5.3286	1.44366e-19	1.05414e-17
JUN	0.972549	8.77868	1.34812e-13	2.69556e-12
SLC18A2	0.969344	6.0224	5.84148e-20	4.7006e-18
CCN1	0.9648	9.52049	1.40125e-10	1.55114e-09
HLA-DQA1	0.960482	9.67689	1.08425e-07	7.13009e-07
AMPD1	0.960194	4.71191	2.65901e-10	2.80634e-09
LRRTM4	0.959863	5.5799	6.33753e-16	2.07894e-14
HSD17B6	0.959519	7.3897	3.86129e-13	7.05517e-12
ECM2	0.958052	5.23186	5.35733e-28	3.64206e-25
LINC00312	0.954344	6.76077	1.37305e-13	2.74263e-12
CCL2	0.953562	9.92371	0.000388892	0.00126539
ST8SIA6	0.950819	6.77429	3.23142e-09	2.81642e-08
IL1B	0.95066	6.74136	3.7084e-08	2.64703e-07
TRAJ41	0.942683	5.08853	2.32535e-12	3.65002e-11
IGLV6-57	0.94204	7.42176	1.29857e-05	5.72734e-05
TGFB2	0.939915	8.03848	3.54757e-16	1.22103e-14
SEMA6D	0.936623	6.97849	3.98545e-20	3.30139e-18
CPA3	0.934469	7.07687	1.11052e-10	1.25538e-09
FAM189A2	0.930421	7.54885	1.23828e-21	1.62752e-19
CASQ2	0.930414	6.42558	1.55707e-14	3.75278e-13
LTBP2	0.927936	8.82782	1.52971e-24	3.72324e-22
ANO1	0.925214	7.09524	7.3539e-18	3.77558e-16
NTRK2	0.92138	5.90104	6.28195e-09	5.17979e-08
NELL2	0.919953	5.2219	1.03646e-15	3.2538e-14
CD83	0.917176	7.159	1.2341e-11	1.68492e-10
SNORD114-3	0.917163	6.77337	2.355e-08	1.7462e-07
SHISA3	0.916892	5.95455	6.03391e-15	1.59676e-13
DCC	0.916035	6.37041	5.82615e-10	5.80994e-09
FAM13C	0.908807	6.77551	2.87122e-31	4.35432e-28
CD79A	0.905397	6.00098	8.99519e-09	7.20602e-08
ATF3	0.905095	6.21157	4.63029e-09	3.9145e-08
RYR2	0.904218	6.29556	8.96641e-32	1.60703e-28
ZMAT1	0.89965	7.01159	9.77846e-25	2.47634e-22
TRAT1	0.895104	6.56272	7.11127e-11	8.37507e-10
RFTN2	0.889654	6.48657	8.82524e-18	4.46127e-16
VEGFD	0.888716	8.52802	1.41456e-07	9.11372e-07
GSTM2	0.884924	7.75959	5.30249e-17	2.20545e-15
CNTN1	0.881003	5.12198	6.84101e-16	2.23295e-14
PTGDS	0.879287	8.50531	1.5638e-17	7.3942e-16
IL2RB	0.877034	6.93279	1.34493e-12	2.21145e-11
TNIP3	0.876302	5.08763	1.76281e-05	7.56339e-05
HPGDS	0.876125	6.74746	2.73733e-12	4.25268e-11
TRDC	0.875325	6.14434	2.678e-06	1.3448e-05
GBP4	0.867259	7.81037	1.73766e-07	1.10083e-06
CHIT1	0.8665	6.99418	0.000813971	0.00245599
BTG2	0.862012	9.32075	1.55035e-19	1.1196e-17
GXYLT2	0.859379	6.81493	3.66895e-14	8.23842e-13
IGHM	0.853417	8.64361	3.07214e-07	1.86017e-06
FOS	0.852991	10.0539	3.60764e-06	1.76663e-05
MIR27B	0.852891	7.19687	2.77042e-14	6.35102e-13
ICOS	0.852132	5.2098	2.51619e-11	3.24227e-10
IGHV1-69	0.847941	6.79854	7.87922e-05	0.000297812
OR5P2	0.844099	5.89559	1.63434e-10	1.78609e-09
KCNAB1	0.844021	5.26466	2.80341e-21	3.34965e-19
PLCB4	0.841705	6.697	1.42033e-30	1.75011e-27
KLRG1	0.839866	6.17455	2.64383e-13	4.98309e-12
KIAA1107	0.83889	5.84166	6.43216e-17	2.61153e-15
GOLGA8A	0.837115	6.29561	3.44252e-10	3.55336e-09
ZNF704	0.834959	7.03527	2.6324e-36	1.29745e-32
NR4A1	0.829757	9.73134	1.1517e-06	6.21054e-06
PRSS12	0.829518	6.48303	9.28503e-24	1.88716e-21
RASGRP1	0.825071	6.88895	1.78107e-10	1.93145e-09
LYZ	0.824705	11.0917	9.70498e-18	4.86854e-16
FRAS1	0.821983	6.51905	1.28642e-10	1.43449e-09
INHBA	0.820515	7.01228	2.5365e-10	2.67991e-09
HLA-DOA	0.817238	7.41036	2.46757e-15	7.06067e-14
CD3G	0.817061	6.36283	1.02728e-06	5.59318e-06
ACE	0.815695	7.59754	1.31346e-12	2.16331e-11
CX3CL1	0.813297	8.44327	2.5239e-08	1.86014e-07
IER3	0.810696	8.42101	6.82615e-10	6.71209e-09
SPEF2	0.805202	5.1451	1.33304e-19	9.88002e-18
SH2D1B	0.792992	4.62302	2.5379e-12	3.96471e-11
GGTA1P	0.792535	5.6487	3.12433e-14	7.11273e-13
TRAV8-3	0.789831	4.4665	2.01716e-08	1.51672e-07
MUC15	0.789326	6.60164	2.9865e-07	1.815e-06
FAT3	0.78396	5.43431	5.9434e-18	3.133e-16
NFATC2	0.782021	7.4242	6.30216e-24	1.30786e-21
AZGP1	0.780075	6.60139	5.66432e-07	3.2586e-06
GBP5	0.779308	6.28056	4.05885e-07	2.40373e-06
HIGD1B	0.778714	7.58852	3.93819e-12	5.92231e-11
BNIPL	0.777486	5.62244	1.15799e-15	3.58958e-14
PLXDC1	0.777284	6.96458	6.11894e-19	3.94231e-17
HACD4	0.775268	7.40691	6.67063e-14	1.4141e-12
SLCO1A2	0.772098	4.26059	2.22926e-15	6.46321e-14
LINC00670	0.771847	4.95875	3.4722e-14	7.83232e-13
SAMD3	0.770961	5.15479	5.6731e-16	1.87032e-14
TXLNB	0.769512	5.06332	2.45966e-20	2.21243e-18
PTPRQ	0.765768	6.38123	1.24041e-08	9.70805e-08
ADGRL3	0.764524	6.13127	3.41721e-11	4.30756e-10
OVCH2	0.764339	5.48978	2.10389e-13	4.05061e-12
ADGRE3	0.76362	6.06128	1.37608e-16	5.1577e-15
SLC35E2A	0.763435	6.73581	1.33757e-07	8.65451e-07
GPM6A	0.76277	6.62718	1.79386e-10	1.94425e-09
SEMA6A	0.761868	8.3466	9.14054e-14	1.88303e-12
MIR23B	0.759211	7.5304	6.94308e-20	5.4535e-18
CP	0.756083	6.70935	4.56596e-07	2.67433e-06
MYOCD	0.755712	6.08346	1.37828e-10	1.5272e-09
CXCL2	0.754459	8.17828	5.24525e-06	2.49061e-05
HMCN1	0.752801	7.44722	1.93802e-17	8.91299e-16
TPPP3	0.749696	8.98129	1.30134e-11	1.76816e-10
BTN3A3	0.74886	7.81937	1.40263e-14	3.43016e-13
SLC14A1	0.748794	4.92327	1.03673e-17	5.16139e-16
PAMR1	0.748685	4.80266	5.23861e-14	1.14121e-12
ZFP36	0.745941	9.79226	1.13978e-07	7.47284e-07
TENM1	0.743356	4.84272	5.71056e-17	2.37018e-15
CD48	0.743259	7.5731	2.02304e-09	1.81954e-08
NRXN3	0.741428	6.45012	2.28022e-11	2.96534e-10
PIM2	0.739964	6.98779	2.57616e-13	4.8695e-12
MYH10	0.7375	9.09268	3.83596e-16	1.30165e-14
CXCL1	0.736949	7.67713	2.41691e-06	1.22429e-05
P2RY14	0.736934	7.81836	5.31764e-24	1.12728e-21
LOC100128288	0.735459	6.51885	4.03536e-23	7.43525e-21
HIST1H2AH	0.734492	6.0106	8.0502e-05	0.000303286
MIR221	0.734432	6.53535	6.42348e-07	3.6622e-06
MAPK10	0.733438	7.22568	7.12025e-15	1.85402e-13
ANK2	0.731348	5.33898	2.37549e-22	3.71689e-20
ERP27	0.730918	7.12693	2.11753e-11	2.76654e-10
FCRL6	0.729552	6.50477	1.35118e-10	1.49992e-09
FAM162B	0.728948	8.08079	2.09094e-16	7.64804e-15
PYHIN1	0.728786	7.32261	6.12003e-13	1.07537e-11
CUBN	0.728219	5.23872	4.34446e-24	9.6237e-22
ARHGEF38	0.727507	7.12089	2.58935e-09	2.29227e-08
ZNF483	0.726323	5.26965	6.50745e-21	7.12746e-19
TRIB1	0.723961	8.69724	1.57425e-08	1.21188e-07
LOC100996535	0.721002	6.31604	1.94198e-12	3.07766e-11
P2RY10	0.719988	5.28326	2.55059e-08	1.8784e-07
TRAF3IP3	0.719552	6.80949	1.95523e-14	4.64599e-13
JUNB	0.719269	9.53523	3.69965e-11	4.63692e-10
NOS1	0.717602	5.92132	8.38991e-16	2.69393e-14
SLC25A27	0.716839	7.02276	1.88184e-10	2.03401e-09
NXF3	0.716655	5.50585	8.56656e-11	9.91137e-10
LUM	0.716624	9.89421	2.49242e-10	2.63757e-09
IER2	0.716378	7.7533	1.94123e-11	2.54802e-10
PLPPR4	0.715585	5.49876	8.75007e-10	8.42733e-09
HDC	0.712462	5.26467	1.82534e-11	2.41647e-10
PDE7B	0.711348	5.76025	3.96375e-20	3.29727e-18
CYSLTR1	0.710423	5.94815	3.32722e-10	3.44337e-09
NFKBIZ	0.708887	7.85905	1.55121e-11	2.08007e-10
TRIL	0.708838	5.48339	4.08153e-18	2.25821e-16
CEP126	0.708657	5.73248	2.91278e-17	1.28182e-15
ECRG4	0.705638	6.89868	1.91903e-15	5.64682e-14
SYNPO2	0.704978	8.04037	8.10753e-09	6.54278e-08
EDNRA	0.702156	8.72909	6.05899e-09	5.01348e-08
SEMA3E	0.70209	5.29139	2.28186e-09	2.03561e-08
FREM1	0.701259	5.68262	6.6899e-19	4.26833e-17
ANOS1	0.700934	8.30734	1.44957e-10	1.59834e-09
WEE1	0.699795	7.02823	9.86038e-11	1.12433e-09
HMGCLL1	0.698628	4.87964	4.11529e-23	7.51231e-21
CFTR	0.696714	6.57167	4.74522e-09	4.0048e-08
LTBP4	0.695412	8.57528	3.79903e-25	1.0549e-22
ANKRD36C	0.695087	7.29645	8.29262e-14	1.72637e-12
KLF3-AS1	0.694202	5.22849	1.60506e-17	7.53421e-16
ABCD2	0.691361	5.18952	1.45361e-16	5.43795e-15
AGAP11	0.690975	4.76961	1.82276e-13	3.56858e-12
SH2D1A	0.689332	4.90772	1.92769e-16	7.10362e-15
CD69	0.688818	7.33651	1.46584e-07	9.41075e-07
TRAV13-2	0.688463	5.63043	1.3982e-08	1.08313e-07
STAMBPL1	0.687427	6.33772	4.67328e-18	2.54513e-16
HLA-DQB1	0.686658	8.2778	2.09415e-05	8.854e-05
MNS1	0.684503	5.08107	5.28145e-11	6.37623e-10
FXYD1	0.6843	7.4662	1.42865e-26	5.63315e-24
IL2RG	0.683995	8.89033	8.76512e-11	1.00878e-09
CH25H	0.683519	6.51775	2.18925e-06	1.11556e-05
IRF1	0.683284	7.70064	4.75645e-08	3.31941e-07
OR52N4	0.682709	4.84931	1.13565e-18	6.91032e-17
HLA-DPA1	0.68176	11.1956	2.53516e-18	1.44871e-16
HLF	0.679053	8.1404	1.20006e-14	2.976e-13
IGHD	0.67834	8.43391	0.00464096	0.0115906
UACA	0.678006	7.16356	2.18449e-19	1.53264e-17
KLRF1	0.676533	4.02991	1.41579e-05	6.18624e-05
HTR3C	0.676392	4.85873	3.77038e-14	8.42778e-13
SEMA3G	0.674153	6.84247	2.11558e-12	3.33402e-11
NTNG1	0.673621	6.56908	5.11339e-18	2.76952e-16
TSPAN11	0.672845	6.34316	1.74136e-10	1.89255e-09
NR4A2	0.672768	7.89587	0.000207151	0.000717117
COLEC10	0.671933	4.17379	2.32118e-09	2.06694e-08
GOLGA8B	0.671885	7.10459	5.28544e-07	3.06177e-06
PRTFDC1	0.671606	5.3774	2.48302e-09	2.20309e-08
CD3D	0.671318	6.82776	5.82745e-06	2.74589e-05
HEY2	0.667163	5.97943	5.1663e-12	7.62377e-11
CCL8	0.667089	4.44818	0.000427404	0.00137797
EPHX1	0.666495	9.06611	1.04698e-11	1.45156e-10
PDLIM3	0.665419	6.87256	3.85977e-09	3.30706e-08
USP32P1	0.66517	6.38636	1.17836e-06	6.34043e-06
THEMIS	0.664571	6.05096	2.11463e-08	1.58312e-07
JCHAIN	0.664126	10.1846	5.10923e-05	0.000200694
ANKRD36	0.663256	6.88729	2.27219e-12	3.57227e-11
PLA2G4C	0.66298	5.34861	2.2762e-15	6.56903e-14
IGHV2-5	0.66266	6.87518	0.00172731	0.00482488
CYSLTR2	0.662357	4.46069	1.54816e-15	4.63859e-14
EPHX2	0.662227	4.5485	3.98326e-19	2.6802e-17
PTCHD4	0.661599	5.93742	6.19051e-08	4.23918e-07
ZNF528	0.661369	6.51607	5.20842e-17	2.17551e-15
TENT5C	0.660923	7.45723	2.41165e-14	5.59362e-13
MEG3	0.660673	6.5674	6.52385e-14	1.38746e-12
FAXDC2	0.658997	9.23926	7.89408e-11	9.20353e-10
SKAP1	0.657698	5.48747	5.28669e-14	1.14914e-12
STAT4	0.657545	6.66348	1.06768e-17	5.30211e-16
NT5E	0.656358	5.16482	1.69288e-12	2.71343e-11
SELE	0.656051	5.28292	0.000228618	0.000784271
KLF12	0.65541	7.08628	6.71466e-32	1.32379e-28
SLC4A5	0.654953	5.52148	1.31735e-16	4.9754e-15
CD2	0.654203	7.01312	5.8408e-08	4.01924e-07
CCDC146	0.653577	6.29335	2.10723e-10	2.25783e-09
TRAV5	0.65296	4.63423	5.15905e-06	2.45323e-05
ITGA4	0.652265	6.99809	3.80145e-13	6.95228e-12
JAM2	0.650803	8.46452	3.65131e-07	2.17874e-06
TRPC1	0.650179	6.56422	1.66147e-21	2.08636e-19
SLC2A12	0.649318	5.4586	9.26355e-11	1.06181e-09
LINC01140	0.648569	5.74153	1.51908e-21	1.94472e-19
MIR29C	0.648397	5.557	3.33439e-08	2.39831e-07
PTGDR	0.647883	6.52798	1.82277e-12	2.91214e-11
KLRB1	0.646818	5.70584	6.10931e-10	6.06165e-09
IL33	0.64524	5.82447	0.000193835	0.000674454
CFD	0.643933	8.32631	1.95596e-14	4.64599e-13
PLA2R1	0.643781	6.47772	2.09421e-20	1.91597e-18
OTUD1	0.643284	7.42653	1.72814e-11	2.2974e-10
TESPA1	0.64177	5.89778	2.50944e-13	4.77083e-12
HLA-DOB	0.641448	5.90168	1.27885e-10	1.42685e-09
NKG7	0.640575	8.10905	3.46931e-07	2.08022e-06
MIR23A	0.639915	6.83355	1.94856e-08	1.47018e-07
PCDHGA8	0.638506	4.46206	2.50367e-11	3.23158e-10
CD1E	0.638417	5.2291	2.65958e-14	6.10404e-13
CTSW	0.637377	6.67131	4.01568e-06	1.94902e-05
CPED1	0.637212	8.13685	8.80889e-19	5.44411e-17
KHDRBS2	0.636387	7.14234	3.01423e-15	8.5259e-14
BTN3A1	0.636379	8.12105	1.13116e-15	3.51749e-14
ARHGEF6	0.636326	8.37832	2.504e-21	3.02861e-19
HGF	0.635884	6.39506	3.26364e-14	7.40423e-13
CD5	0.635291	6.30587	4.67471e-08	3.26584e-07
CAPN3	0.634581	7.26317	3.20421e-10	3.33005e-09
HLA-DPB1	0.633879	10.8804	2.22408e-14	5.21376e-13
OLFML1	0.63386	6.40019	1.06718e-05	4.7882e-05
ETV5	0.632849	7.97184	1.14266e-14	2.84798e-13
C8B	0.631422	5.07142	4.05868e-09	3.46094e-08
VSNL1	0.628632	5.64952	3.66564e-07	2.18597e-06
RARRES2	0.62841	7.993	7.54153e-21	8.0805e-19
DKK2	0.626364	7.21118	4.02237e-08	2.85461e-07
THBD	0.623312	8.66147	5.55366e-11	6.67625e-10
FCRL3	0.62256	5.28452	1.26756e-14	3.12765e-13
CLEC2D	0.621774	6.60763	3.21227e-13	5.943e-12
CD27	0.615157	6.25133	2.00723e-08	1.50982e-07
PCDHGA10	0.614501	6.56521	4.97938e-18	2.70437e-16
PRKG2	0.613499	4.69493	9.21116e-12	1.29251e-10
IGKV4-1	0.611976	8.3436	0.00994751	0.0226043
SYTL2	0.611395	6.05225	3.90436e-22	5.78756e-20
APOBEC3G	0.611297	6.00709	5.28647e-07	3.06177e-06
HMGCS2	0.611102	4.6996	9.29351e-09	7.42088e-08
ADGRV1	0.610372	6.34621	1.51311e-14	3.66473e-13
CFAP69	0.610019	5.14992	2.59393e-14	5.97421e-13
NRN1	0.607404	7.43221	4.52309e-11	5.58376e-10
PDE5A	0.605563	7.92373	7.01327e-16	2.28163e-14
DCSTAMP	0.604397	5.40623	3.28929e-05	0.000134157
IL5RA	0.604196	5.17146	2.98425e-08	2.16463e-07
XAF1	0.603992	8.26782	1.13498e-11	1.5604e-10
YPEL1	0.601899	6.03844	2.1426e-22	3.37931e-20
CFAP44	0.601818	5.9229	1.3768e-12	2.2582e-11
ZBTB20	0.60112	8.69319	3.50926e-32	7.68724e-29
SNORA36A	0.600911	7.36539	1.57056e-05	6.79175e-05
TMEM232	0.60042	5.79362	8.64562e-07	4.79866e-06
PREX2	0.599961	7.98362	1.37414e-22	2.3537e-20
RXRG	0.598837	4.85491	1.37334e-08	1.06638e-07
MIRLET7A2	0.597514	4.31176	1.99044e-07	1.24497e-06
VWA3A	0.596549	5.69349	3.65213e-09	3.14693e-08
PER3	0.594664	6.93233	5.61742e-07	3.23444e-06
ACOXL	0.594592	6.7025	6.82436e-10	6.71209e-09
DPT	0.594537	7.26041	1.35867e-06	7.22193e-06
IGHG3	0.593216	10.0933	8.03193e-05	0.000302829
ACTN2	0.59262	5.48703	6.11402e-17	2.5112e-15
ANKRD36B	0.592487	6.85898	2.60902e-09	2.30762e-08
OFD1	0.592338	6.42357	1.81682e-14	4.34166e-13
HBEGF	0.592243	9.40013	2.53055e-05	0.000105228
PCDH18	0.591304	6.8288	1.38142e-06	7.32118e-06
LAX1	0.590959	5.53897	1.64501e-10	1.79477e-09
SLIT3	0.590878	8.4814	4.33481e-14	9.56805e-13
ISLR	0.590839	6.87942	6.48121e-14	1.37988e-12
CTSF	0.590649	6.73243	4.68905e-23	8.48116e-21
KLF10	0.590136	8.86057	4.67477e-11	5.74583e-10
ENPP3	0.589901	5.11423	1.5855e-17	7.4602e-16
APLN	0.589694	5.87673	6.34569e-09	5.22797e-08
MYH11	0.589462	8.9359	1.65723e-10	1.80709e-09
RPS6KA5	0.588793	5.77305	7.48646e-20	5.81085e-18
CABLES1	0.587036	7.01317	3.72252e-16	1.27192e-14
JUND	0.586798	8.95447	4.60274e-11	5.6679e-10
OR52H1	0.585073	5.6258	9.31613e-15	2.36077e-13
GZMA	0.583838	5.7496	3.21411e-06	1.58972e-05
RANBP3L	0.582709	5.46134	4.61486e-05	0.00018321
ADHFE1	0.582209	7.66319	1.98344e-08	1.49364e-07
ECHDC2	0.581719	6.8526	3.75606e-15	1.03278e-13
RGS13	0.581311	5.01263	1.01456e-09	9.66284e-09
KIAA1217	0.581023	8.27255	3.78973e-22	5.6602e-20
CAMK4	0.580929	5.64994	3.11244e-12	4.79574e-11
OR5P3	0.580713	6.72918	3.24931e-10	3.36981e-09
ARHGAP15	0.580712	7.01715	1.24001e-12	2.05262e-11
TRGV2	0.579739	4.9192	0.00671834	0.0160977
C10orf67	0.57869	4.33334	3.87674e-14	8.62639e-13
PIK3CG	0.578518	7.45143	4.90131e-13	8.78448e-12
IGLV3-10	0.578373	5.02989	0.0413872	0.0783963
SNORD94	0.577563	9.59222	5.93124e-11	7.09288e-10
TCP11L2	0.577478	7.43314	3.95058e-15	1.07875e-13
PLCB1	0.57656	7.04901	7.12833e-15	1.85402e-13
ANKRD44	0.57653	8.39524	3.08219e-22	4.7105e-20
EPB41L5	0.576311	7.93793	1.07892e-17	5.34442e-16
DLGAP1-AS1	0.576045	6.78166	7.26879e-21	7.83176e-19
PLK2	0.575796	7.05406	2.15165e-09	1.92642e-08
IGLV1-40	0.575693	6.07429	0.0216156	0.044731
ABI3BP	0.575528	9.8806	1.33029e-17	6.44388e-16
PYROXD2	0.575132	5.73479	7.07999e-21	7.71171e-19
SLC40A1	0.574534	9.27117	1.22458e-14	3.02538e-13
PNRC1	0.574531	9.14121	4.66116e-34	1.45819e-30
TMEM130	0.573049	6.35942	5.12799e-08	3.55855e-07
RAMP2	0.572968	7.79441	4.35542e-07	2.56703e-06
MME	0.572776	8.32626	6.89957e-07	3.90876e-06
PCDHGB5	0.57275	6.80359	7.97731e-20	6.09584e-18
ITGAL	0.572686	7.53784	1.55201e-11	2.08007e-10
TCF21	0.572631	9.11887	1.30477e-15	3.96968e-14
FMO3	0.572334	7.05493	1.188e-08	9.33128e-08
GBP1	0.572103	8.96471	1.06796e-05	4.79062e-05
CCDC191	0.571801	4.92172	1.28701e-15	3.93385e-14
SGCG	0.571515	4.8039	1.90999e-15	5.62862e-14
ZC3H6	0.57112	7.31947	6.53469e-18	3.42637e-16
KLHL3	0.570651	5.90981	5.26477e-14	1.14564e-12
GYPE	0.570647	6.10237	5.73222e-12	8.3898e-11
CCN2	0.569918	9.84221	2.42482e-09	2.15413e-08
CYBRD1	0.569152	9.89281	6.9578e-12	9.99075e-11
FGFBP2	0.568189	4.60252	1.65794e-06	8.65634e-06
PIEZO2	0.567785	7.1949	3.56172e-09	3.0744e-08
ITIH5	0.56691	7.20896	2.19209e-14	5.14488e-13
LOC100996685	0.56661	4.22365	2.97168e-13	5.56907e-12
CD200	0.565234	6.46213	1.16558e-06	6.2768e-06
CPE	0.563424	7.02629	1.51433e-12	2.4572e-11
HAS2	0.562307	6.01346	0.00021748	0.000749451
CD96	0.561692	7.63385	2.26869e-07	1.40651e-06
TIGIT	0.561063	5.42581	1.30265e-14	3.2062e-13
TTLL3	0.56065	7.67439	2.42192e-09	2.15276e-08
CLUHP3	0.560364	6.29886	3.53808e-16	1.22103e-14
TRGV8	0.559097	5.03156	0.000536127	0.00169496
PNPLA7	0.558808	6.26967	4.18072e-14	9.27141e-13
SP140	0.558739	5.76177	5.44776e-16	1.80509e-14
ZNF83	0.557702	6.95279	4.13122e-09	3.51519e-08
STEAP4	0.556904	9.07089	7.70585e-06	3.5562e-05
NAALADL2	0.555516	5.89844	6.25121e-12	9.0753e-11
TSPAN6	0.553781	7.0432	2.521e-10	2.66639e-09
CD3E	0.553416	7.62912	8.16431e-06	3.75109e-05
MYOZ1	0.553234	4.38642	3.18075e-10	3.30916e-09
OLR1	0.552864	8.34797	0.000533849	0.00168911
ITGA8	0.552786	8.04121	2.28215e-08	1.69847e-07
GNLY	0.552547	6.88878	4.89259e-06	2.33496e-05
METTL24	0.552511	4.81792	1.08073e-15	3.37664e-14
RSPO2	0.551734	5.52072	4.33696e-09	3.67282e-08
ATP1B2	0.550848	6.46972	1.36421e-11	1.84848e-10
PER2	0.5497	6.98372	2.68811e-08	1.97108e-07
KLRC4-KLRK1	0.548769	4.45217	9.03919e-07	4.98622e-06
SULF1	0.547976	6.88154	5.05485e-09	4.24431e-08
PCMTD2	0.547945	8.00816	1.89116e-18	1.10965e-16
TAGAP	0.547629	6.00343	7.58575e-11	8.87556e-10
NCALD	0.547566	7.14516	2.94389e-14	6.73303e-13
LRP4	0.547064	6.40625	5.47862e-18	2.92713e-16
CADPS	0.546963	3.99099	1.27777e-15	3.91168e-14
FOLR2	0.546902	6.63233	1.49586e-06	7.88315e-06
STARD9	0.546883	6.55307	1.90404e-15	5.61947e-14
GNA14	0.546686	7.24625	9.27644e-09	7.41025e-08
PRKAA2	0.546344	5.83512	1.13453e-14	2.83129e-13
PLCH1	0.545891	6.81036	3.72948e-11	4.67133e-10
ADGRA2	0.545866	7.63595	5.21708e-15	1.39806e-13
FGL2	0.545753	7.42677	3.42709e-09	2.96858e-08
DACH1	0.545032	6.59234	1.27074e-12	2.09996e-11
ZAP70	0.544883	5.96227	1.18764e-13	2.40147e-12
PDCD4	0.544191	6.88952	3.48915e-16	1.20682e-14
HOMER1	0.544043	5.59093	3.34243e-16	1.16424e-14
MLF1	0.543777	5.094	4.18709e-09	3.55659e-08
PCDHGB4	0.541847	7.06158	6.99946e-14	1.48063e-12
LENG8	0.540672	8.56753	4.24033e-10	4.31363e-09
LOC728715	0.540384	3.05573	9.83177e-08	6.50229e-07
TPT1-AS1	0.539632	7.63173	9.58286e-13	1.62308e-11
AKAP6	0.539387	6.20934	7.64584e-17	3.02451e-15
TMEM88	0.539267	7.44761	2.9273e-09	2.56725e-08
KLHDC1	0.538756	6.68824	6.88196e-11	8.12443e-10
HIST2H2BE	0.538645	8.18966	8.50149e-06	3.8915e-05
ARGLU1	0.53821	8.84666	7.48658e-19	4.67082e-17
UBA7	0.538133	7.89057	7.03389e-14	1.48472e-12
TMEM176A	0.537808	7.87689	6.49069e-07	3.69518e-06
TSHZ2	0.537589	5.48528	4.00961e-16	1.34667e-14
CSF3	0.537419	7.09386	5.07693e-05	0.000199643
TLR7	0.537392	5.69332	4.82921e-08	3.36542e-07
ASPA	0.537178	4.91501	3.91027e-11	4.873e-10
IGHV1-18	0.537177	8.43654	0.0175037	0.0372019
HCAR2	0.536451	6.59181	2.29044e-11	2.9747e-10
SLC6A16	0.536438	6.21022	4.0622e-14	9.01872e-13
SIGLEC17P	0.535261	5.30941	1.52883e-14	3.68922e-13
PRLR	0.535196	4.23623	1.44197e-10	1.59085e-09
CBX7	0.534547	7.09957	4.51525e-20	3.67843e-18
HIST1H4E	0.534504	9.07592	7.70712e-13	1.3282e-11
SEC16B	0.533556	5.13782	6.63722e-15	1.73545e-13
SEPTIN1	0.533074	5.39854	1.02575e-12	1.72991e-11
BAALC	0.532867	6.39017	1.41814e-06	7.49763e-06
NTN4	0.532656	8.59639	2.00488e-13	3.88655e-12
DEPP1	0.532152	8.62129	3.84025e-05	0.000154701
TFDP2	0.531965	7.19057	3.94384e-16	1.33138e-14
TDRD10	0.53099	5.83127	3.75936e-16	1.27786e-14
IGKC	0.530122	11.2516	0.000202664	0.000702076
TMEM133	0.528897	7.35515	4.01202e-15	1.09401e-13
SIDT1	0.528229	5.86826	2.44126e-14	5.65564e-13
BICC1	0.52818	5.91965	7.24999e-13	1.25601e-11
DLL4	0.527745	7.51903	1.17338e-06	6.31538e-06
PLEKHA5	0.527672	7.04747	1.98783e-15	5.81454e-14
THSD7A	0.527315	6.34058	3.31916e-18	1.88038e-16
TRANK1	0.527052	7.14937	6.26889e-23	1.12356e-20
EXPH5	0.52682	7.06397	2.16525e-09	1.93772e-08
TRGV5	0.526752	5.18284	0.00127583	0.00367198
TCIM	0.526746	7.85837	6.66789e-11	7.8906e-10
XRRA1	0.526641	6.19444	4.03233e-08	2.86065e-07
GCNT4	0.526195	4.60152	9.84039e-09	7.82902e-08
CD247	0.525111	6.12193	5.1379e-11	6.23091e-10
ABCC9	0.524374	7.78222	8.31562e-11	9.64935e-10
FAP	0.523345	4.45066	1.88462e-06	9.73162e-06
TSPAN8	0.522566	5.63889	6.22178e-05	0.000240467
KIAA1328	0.522224	6.7152	8.27349e-25	2.17482e-22
PLCE1	0.522148	8.16418	3.26521e-24	7.39926e-22
DENND2A	0.521812	6.03412	1.48361e-17	7.06506e-16
BMP3	0.521373	6.22494	9.01643e-08	6.00943e-07
KIAA1324	0.521211	7.29538	3.64568e-06	1.78349e-05
PCDHB5	0.521207	6.33612	1.22795e-09	1.15529e-08
MCOLN3	0.521199	6.60499	6.55641e-08	4.46647e-07
LTBP3	0.519377	7.84825	1.59199e-29	1.49458e-26
MSLN	0.518949	7.46777	0.00011389	0.000416886
PCDHB18P	0.518783	5.5025	1.02919e-13	2.10265e-12
SERPINB3	0.518326	4.56565	0.0162209	0.0347565
LOC100049716	0.518109	6.38995	3.19838e-13	5.92633e-12
LMO7DN	0.517605	5.36186	4.15527e-08	2.93624e-07
SELENBP1	0.517269	9.73728	1.27912e-13	2.56844e-12
BMP4	0.517185	5.07227	2.89391e-09	2.54022e-08
TRBV28	0.516868	6.18448	7.40536e-05	0.000281684
RGS7BP	0.516712	6.33158	8.54529e-06	3.90792e-05
GPRASP1	0.516665	5.50546	5.33701e-14	1.1588e-12
PLA2G2D	0.516617	6.47637	7.09894e-06	3.30084e-05
AMT	0.516207	6.16846	2.05521e-10	2.2093e-09
CXorf65	0.516187	4.85587	3.43043e-13	6.31474e-12
HIST1H3A	0.515708	6.07384	1.61788e-06	8.47169e-06
AGBL2	0.515409	4.78606	2.43395e-05	0.000101599
P2RY13	0.515059	6.18795	6.39569e-05	0.000246224
PATJ	0.514477	8.00828	4.53055e-21	5.163e-19
HPGD	0.514373	8.26667	0.000816995	0.00246361
TMEM255A	0.514164	6.11831	0.000327087	0.00108197
ZNF577	0.513261	6.30823	4.6805e-09	3.95356e-08
PPP1R10	0.512159	8.57873	7.78384e-14	1.63254e-12
PRDM6	0.510421	6.62804	2.93406e-20	2.58237e-18
TMEM212	0.510339	6.00177	0.00450525	0.0113018
IGHG1	0.510303	11.5611	8.62402e-06	3.9371e-05
FCER1A	0.509984	5.37202	1.06789e-12	1.79178e-11
IDO1	0.509056	6.90533	0.0152513	0.0329259
SOX5	0.508651	6.94786	1.71703e-22	2.86875e-20
DTHD1	0.508492	5.3526	6.8004e-05	0.000260481
STAP1	0.508356	3.79299	1.23868e-10	1.38595e-09
ZNF135	0.507276	6.26423	3.40971e-18	1.92064e-16
ANTXR1	0.507153	8.72039	3.84152e-17	1.64285e-15
GDPD3	0.507053	5.99431	3.60845e-10	3.71297e-09
RGS4	0.50698	5.0345	3.36112e-10	3.4748e-09
LY9	0.506443	6.16482	2.69037e-08	1.9716e-07
L3MBTL3	0.505991	6.43188	1.63796e-23	3.13518e-21
HAS3	0.504782	6.31115	2.69415e-12	4.19551e-11
EVL	0.504461	7.51405	1.01627e-17	5.07236e-16
NAALAD2	0.504251	3.7715	5.14544e-18	2.77924e-16
ZNF471	0.503868	5.09512	1.17534e-20	1.19442e-18
COL4A3	0.503703	5.95401	1.58648e-20	1.54328e-18
PTPN13	0.5031	8.74325	3.17866e-09	2.77534e-08
CHN1	0.503038	7.22883	2.29965e-09	2.05055e-08
ERAP2	0.502852	7.27638	0.00383445	0.00979226
PCDHGB7	0.502677	6.34194	1.69748e-21	2.11321e-19
RAVER2	0.502471	7.2321	4.51132e-10	4.5634e-09
NR1D2	0.502161	7.63111	1.6455e-07	1.0475e-06
PLN	0.502142	6.26503	6.06325e-05	0.0002348
CFAP70	0.501787	4.74152	1.53983e-07	9.8468e-07
PIK3C2B	0.501603	7.3653	1.32352e-10	1.4717e-09
IGHV3-9	0.501217	9.08607	0.0193488	0.0406416
EPB41L2	0.499472	8.4561	4.83826e-19	3.22251e-17
TET1	0.499444	4.62213	1.96337e-15	5.75155e-14
C21orf91	0.499253	6.13576	2.9493e-10	3.083e-09
ZNF610	0.49911	4.81498	8.76394e-15	2.2352e-13
ZNF737	0.49878	6.51549	0.000567374	0.00178061
SULT1C2	0.498772	4.88515	1.96209e-08	1.47878e-07
C1orf198	0.498119	9.09539	1.71366e-09	1.56411e-08
NPY1R	0.497945	4.82942	0.000188569	0.000657989
GALNT13	0.497411	4.72922	1.85129e-08	1.40431e-07
CCDC3	0.496812	7.12386	2.01303e-07	1.25711e-06
DDR2	0.496246	8.23872	6.09998e-20	4.88866e-18
FFAR4	0.496027	6.12215	0.000468857	0.00149935
CLDN1	0.495936	7.08229	0.00367755	0.00942943
EFHC1	0.49528	6.80455	6.73675e-11	7.96253e-10
DPYS	0.495123	5.2831	1.42385e-10	1.5735e-09
DCN	0.495095	9.54042	3.67498e-14	8.24257e-13
DNAH6	0.494425	4.45119	7.45487e-06	3.45088e-05
CCNG2	0.493935	7.85845	4.00524e-08	2.8445e-07
LMCD1	0.493662	8.42913	1.22175e-12	2.02922e-11
ARID5B	0.493596	8.59477	6.08234e-19	3.93159e-17
ITGBL1	0.492791	6.8391	8.0447e-08	5.41301e-07
C1orf140	0.492523	4.79453	8.98379e-16	2.8521e-14
PDE7A	0.492433	6.686	1.45668e-17	6.9536e-16
TRAV19	0.492186	4.65328	3.75723e-06	1.8326e-05
CD28	0.492118	5.05148	3.66472e-08	2.61965e-07
DZIP3	0.492017	5.85522	1.80887e-11	2.39663e-10
HLA-DMA	0.491966	10.2498	1.41747e-11	1.91776e-10
SYCP2L	0.491845	4.17261	1.5774e-12	2.54906e-11
SLITRK6	0.491767	4.44682	0.000128615	0.000465513
ZNF37BP	0.491743	6.72704	1.68583e-11	2.24873e-10
CXCL8	0.491666	7.32238	0.0168344	0.0359383
TAS2R43	0.491324	3.11854	5.38716e-08	3.73052e-07
PCDH12	0.491323	6.24657	8.7852e-10	8.45291e-09
PCYOX1	0.490515	9.33136	1.72467e-08	1.31995e-07
DYNC2LI1	0.49037	6.0108	3.9079e-11	4.873e-10
AHSA2P	0.489829	7.10254	1.06072e-06	5.76252e-06
BLID	0.489656	4.87494	2.3916e-11	3.09792e-10
CCDC171	0.489427	5.51726	9.03084e-15	2.3003e-13
FGFR3	0.488497	6.87015	1.01098e-13	2.06757e-12
MUSK	0.48846	5.5122	8.90745e-08	5.94886e-07
GSDMB	0.487951	5.39999	9.45897e-08	6.26625e-07
FAM47E	0.487302	4.43291	7.66825e-08	5.17207e-07
GLI3	0.487212	6.85942	6.96987e-12	9.99353e-11
CCNL1	0.486328	8.74104	6.0054e-10	5.96757e-09
PRICKLE2	0.486145	7.59761	1.71579e-09	1.56476e-08
F11	0.486077	6.03349	1.33851e-06	7.13402e-06
TRAV17	0.485101	5.32978	3.09417e-05	0.00012677
GLCCI1	0.484899	8.16363	5.63654e-13	9.94309e-12
SPTLC3	0.483779	7.58839	1.75458e-08	1.33868e-07
ELF3	0.4836	7.28644	0.00148191	0.00420788
MBD5	0.48295	7.36502	2.01425e-29	1.80504e-26
MTERF2	0.482921	5.09605	6.25155e-13	1.09555e-11
HLA-DQB2	0.482269	6.75928	1.74136e-08	1.33118e-07
ATP8B5P	0.482232	3.90353	5.96153e-07	3.41562e-06
PLAC8	0.482136	8.25996	1.16478e-08	9.16714e-08
APOL3	0.482132	6.79052	1.07213e-11	1.48434e-10
TP53INP1	0.481102	7.90072	4.12242e-12	6.16643e-11
C5orf56	0.480501	8.66714	6.44518e-20	5.12366e-18
ITGA9	0.480453	8.16047	5.73135e-19	3.74207e-17
LDB1	0.479845	9.44756	2.09779e-23	3.93885e-21
MAP4K1	0.478525	6.10708	1.83208e-11	2.42088e-10
LOC100133315	0.478379	6.8968	3.46639e-13	6.36905e-12
TRAF1	0.478286	4.96242	8.51574e-11	9.86414e-10
SEMA5A	0.478103	8.3752	3.4598e-11	4.35568e-10
FCMR	0.477869	6.77267	1.20359e-07	7.85721e-07
DOCK4	0.477713	8.94137	4.02977e-22	5.92888e-20
PLK3	0.477686	7.1471	1.54944e-06	8.14808e-06
GNG2	0.477593	7.68892	2.65978e-07	1.6285e-06
NFASC	0.477477	6.48168	4.37206e-12	6.51021e-11
NECAB1	0.477242	7.67511	1.00017e-06	5.46365e-06
LINC00310	0.477124	5.30696	5.96171e-12	8.71275e-11
SCGB3A1	0.477102	9.16913	0.000904315	0.00269803
CD200R1	0.477086	4.0597	6.96198e-08	4.7248e-07
GUCY1A2	0.477044	7.59646	1.03676e-10	1.17808e-09
IKZF3	0.476691	6.54368	3.08552e-07	1.86656e-06
SMAD9	0.476688	6.93335	7.08014e-10	6.93074e-09
RABGAP1L	0.475598	7.07535	1.17083e-12	1.94957e-11
DPYSL3	0.475171	7.25963	9.19542e-15	2.33618e-13
SULT1C4	0.474683	6.38632	3.71533e-08	2.65102e-07
LOC541472	0.474605	4.3304	7.21994e-09	5.87458e-08
MBOAT1	0.47431	7.57593	3.35795e-20	2.89092e-18
WIF1	0.473575	9.72176	0.00111115	0.00324355
CLDN11	0.472735	7.19445	5.07086e-15	1.36574e-13
SENP7	0.472137	6.33341	7.26678e-15	1.88754e-13
JCAD	0.471637	8.02725	2.72084e-09	2.39578e-08
C12orf75	0.471154	6.87154	5.76094e-08	3.96983e-07
CASP12	0.470442	4.33345	7.05787e-12	1.00903e-10
IGKV1D-12	0.470139	5.68888	0.00286215	0.00757615
GJA5	0.469796	7.59782	8.59366e-05	0.000321854
ACOX2	0.469549	5.73101	1.98572e-18	1.16168e-16
MVB12B	0.469102	7.40962	6.60684e-19	4.22902e-17
MASP1	0.468081	5.17372	1.06275e-16	4.0763e-15
PPP1R15A	0.468013	8.48662	1.75617e-05	7.53817e-05
SNORA14A	0.466911	7.88289	0.00148433	0.00421179
TRAV14DV4	0.466191	4.72932	0.000730097	0.00222712
PCDHGA9	0.465752	7.11752	1.45475e-15	4.38537e-14
ADAM28	0.465488	6.14713	2.11989e-07	1.31883e-06
FILIP1L	0.465371	7.0223	8.11411e-12	1.14756e-10
EFCAB13	0.465312	4.00128	3.54027e-15	9.84435e-14
COL14A1	0.465171	7.28673	8.60055e-05	0.000322051
PCDH17	0.465145	8.34874	2.64201e-06	1.32876e-05
CACHD1	0.464857	7.91719	9.40747e-12	1.31445e-10
ANKRD29	0.46485	7.97693	8.84817e-11	1.01775e-09
PILRB	0.463871	8.03543	3.08039e-08	2.22862e-07
ACACB	0.463627	6.89969	5.02356e-10	5.04788e-09
HOXB3	0.463572	5.54727	6.60638e-15	1.72968e-13
ICAM1	0.46352	9.85081	0.00157271	0.00443894
BCAS3	0.463021	7.94413	2.88634e-19	1.96221e-17
IL11RA	0.462323	6.5191	5.9431e-19	3.85422e-17
GFRA1	0.461978	5.39323	5.31807e-22	7.59752e-20
EFNB2	0.461533	8.12836	2.08086e-08	1.56045e-07
IFI44L	0.461426	7.75689	0.0011881	0.00344208
SLC5A9	0.461404	5.79314	6.21583e-06	2.91829e-05
OGA	0.46075	8.24349	4.67689e-12	6.9327e-11
CTSO	0.460495	6.782	1.32151e-05	5.81553e-05
FXYD6	0.460323	7.89907	5.19697e-14	1.13339e-12
ARAP2	0.459918	7.62763	3.69239e-14	8.26283e-13
UNC5C	0.459892	6.19665	1.68264e-20	1.60257e-18
GARNL3	0.459653	6.03219	5.31491e-15	1.41983e-13
SHANK2	0.459506	7.05386	5.8541e-14	1.25997e-12
ARHGEF37	0.45948	5.64649	3.78371e-14	8.43845e-13
MIR222	0.459236	3.51082	2.27543e-05	9.55689e-05
SV2B	0.459077	4.12787	7.41678e-12	1.05728e-10
SNORD48	0.458965	8.06773	4.19428e-08	2.96168e-07
N4BP2L1	0.458639	6.87359	4.76238e-17	1.99766e-15
EYA4	0.458423	5.07882	4.28619e-11	5.31795e-10
IGKV5-2	0.457657	6.11908	0.000162651	0.000575702
MZB1	0.457256	6.39308	4.34948e-05	0.000173654
ANKAR	0.457009	5.72362	3.1081e-11	3.93553e-10
CACNB4	0.456782	5.92668	3.9275e-10	4.01611e-09
CCDC102B	0.456764	7.6197	2.88436e-07	1.75672e-06
PTPN22	0.456679	6.33755	4.43437e-08	3.11671e-07
GUCY1A1	0.456149	8.19653	6.96915e-09	5.68225e-08
HOXA2	0.455785	5.99321	8.59482e-08	5.75737e-07
GULP1	0.455319	7.03974	6.84134e-10	6.72033e-09
SCARNA4	0.455274	6.18428	5.24985e-05	0.00020589
XCR1	0.455226	5.87982	4.93987e-08	3.4389e-07
CAV1	0.455188	11.1916	6.69689e-12	9.64493e-11
GRAP2	0.455128	6.66194	8.97324e-06	4.08142e-05
ARMCX4	0.454987	4.84374	3.77935e-10	3.88477e-09
BBS9	0.454834	6.95961	1.32545e-20	1.31976e-18
PDK2	0.454832	7.16496	1.0463e-12	1.76005e-11
INPP4B	0.454815	7.82756	1.48448e-14	3.60424e-13
TPCN1	0.454794	7.96599	7.13226e-17	2.84641e-15
GABPB2	0.454677	6.80557	1.78023e-24	4.22857e-22
C16orf89	0.454097	8.67366	3.1125e-09	2.71999e-08
CTNNAL1	0.454086	7.35161	1.96895e-06	1.01299e-05
OR4K2	0.453676	4.68477	1.98473e-05	8.42027e-05
CNN1	0.453632	7.3857	0.000150325	0.000536364
MEOX2	0.453538	7.60168	6.49413e-12	9.39338e-11
CENPC	0.452365	7.51846	1.53255e-13	3.04579e-12
LINC00174	0.452153	5.33014	6.41275e-09	5.2722e-08
DLEC1	0.450979	5.75244	1.95708e-05	8.3119e-05
FMO2	0.450896	9.32325	5.04061e-07	2.93057e-06
UBD	0.45072	5.68733	4.72163e-06	2.25939e-05
MAATS1	0.450584	4.45296	1.30805e-06	6.97731e-06
GATM	0.44994	5.99988	1.55239e-08	1.19599e-07
LMO7	0.44993	8.91193	1.73038e-13	3.40463e-12
TRABD2A	0.44951	5.70186	1.0493e-21	1.40728e-19
SCGB1A1	0.448945	11.1477	0.00448646	0.0112633
PCMTD1	0.448769	8.47549	4.67122e-07	2.7303e-06
PCDHGA11	0.448038	5.29673	8.23767e-13	1.40495e-11
CSAD	0.447946	6.85858	8.48137e-07	4.7128e-06
PRRT2	0.447743	6.08688	7.18691e-13	1.24617e-11
SSBP2	0.447643	8.89064	6.44579e-17	2.61153e-15
FHL5	0.447355	6.98398	3.62638e-06	1.77493e-05
STAB2	0.446966	4.19288	6.12162e-10	6.07081e-09
TRAV29DV5	0.446866	6.10325	4.07274e-08	2.88412e-07
PCDHA10	0.44631	4.76369	1.87821e-06	9.70103e-06
RNF122	0.446301	7.91568	1.46591e-07	9.41075e-07
MACF1	0.446288	10.3153	4.95955e-19	3.28113e-17
KIT	0.446251	7.21886	0.000232999	0.000797771
FLACC1	0.446207	5.90421	8.23489e-07	4.58618e-06
MIR21	0.446181	8.92053	0.000433747	0.00139659
RHOJ	0.44612	9.02025	1.99704e-09	1.79943e-08
IL32	0.446059	8.9493	0.000233129	0.000798078
LDB2	0.445815	9.26719	6.7055e-08	4.56271e-07
UBASH3A	0.445709	5.03639	2.87777e-07	1.75379e-06
PRF1	0.445682	7.35345	1.44824e-05	6.31266e-05
ADCY4	0.445565	7.92319	2.28758e-10	2.43782e-09
SAMD9L	0.445489	8.62868	3.54981e-07	2.12396e-06
TBX4	0.445173	8.49285	5.3127e-12	7.82225e-11
SOCS3	0.444979	7.97551	0.00972977	0.0221863
PIK3IP1	0.444763	7.7333	1.62849e-12	2.62087e-11
IGHV3-13	0.444727	8.91266	0.00528499	0.0130356
MICALCL	0.444647	6.56754	5.3295e-07	3.08307e-06
RASGRF2	0.444572	6.29195	4.60189e-05	0.000182732
ARNT2	0.444277	6.10825	2.96834e-06	1.47929e-05
CD6	0.443839	6.26728	2.606e-09	2.30598e-08
MS4A15	0.44314	7.9603	0.000187473	0.000654457
PCDHB9	0.443102	6.41377	2.62433e-12	4.0965e-11
SP4	0.442902	7.43847	1.97774e-22	3.20065e-20
PCDHGB3	0.441896	4.23306	4.55339e-11	5.61765e-10
HLA-DMB	0.441698	9.56973	4.78109e-07	2.79038e-06
ZNF487	0.441508	4.88667	2.8196e-08	2.05351e-07
TMEM156	0.4413	3.87292	4.97454e-07	2.89557e-06
ZNF117	0.44088	6.90547	3.13937e-06	1.55705e-05
SNED1	0.440641	6.91607	1.28272e-11	1.74612e-10
CPAMD8	0.439658	7.10557	7.06415e-14	1.48952e-12
GPR155	0.439649	6.39648	5.31007e-15	1.41983e-13
CRYZL2P	0.439315	7.09542	3.7704e-10	3.87759e-09
HCP5	0.439254	7.25163	2.49843e-05	0.000104092
SCAPER	0.439184	7.67441	1.48162e-14	3.60174e-13
ROBO4	0.438789	7.82961	1.17203e-09	1.1061e-08
CAPS2	0.438722	5.06276	2.32984e-08	1.72874e-07
AKAP9	0.438621	7.59986	2.81924e-16	1.00327e-14
SMAD3	0.438547	7.46963	1.39142e-20	1.37849e-18
SPATA6	0.438487	7.57664	5.5997e-12	8.21414e-11
CALCOCO1	0.438218	8.30257	2.9782e-22	4.58713e-20
PDE8B	0.438204	6.03752	9.35598e-09	7.46774e-08
ESR1	0.438199	5.1769	2.96635e-17	1.29959e-15
PCDHB14	0.437817	6.71012	9.60554e-10	9.18396e-09
SRSF5	0.437119	9.69971	2.12617e-16	7.74815e-15
ALAS2	0.435899	4.77952	3.86155e-07	2.29378e-06
SIRPG	0.435532	5.33284	1.2035e-07	7.85721e-07
DLC1	0.435293	6.9927	1.57402e-17	7.42387e-16
NR1D1	0.435188	7.0676	0.00645729	0.0155459
CARD11	0.434966	5.94747	9.37294e-10	8.98231e-09
ARHGAP20	0.434912	5.66516	5.30819e-10	5.31223e-09
ADRB2	0.434445	8.81463	4.77685e-12	7.07024e-11
ANTXR2	0.433809	8.70773	8.58537e-15	2.19534e-13
TMEM140	0.432801	7.95126	1.70798e-07	1.08412e-06
LRRC6	0.43246	5.70709	5.17519e-07	3.00261e-06
PCDHB10	0.432342	4.99468	2.58428e-15	7.37323e-14
TRBV27	0.432264	3.71295	0.00218656	0.0059665
POGZ	0.432228	9.07523	2.06038e-20	1.90706e-18
C12orf63	0.431921	4.27243	0.000386987	0.00126002
CRTAC1	0.431885	7.63438	3.81287e-07	2.26759e-06
BHLHE40	0.430677	9.21883	5.59516e-05	0.000218389
VGLL1	0.430483	5.73705	3.47838e-08	2.49459e-07
ZNF763	0.430459	5.10716	2.36614e-07	1.46325e-06
GBP3	0.430149	6.11748	2.28131e-05	9.57957e-05
TAS2R14	0.430057	6.18641	2.14574e-09	1.92212e-08
FRY	0.429625	7.53518	1.5721e-19	1.13117e-17
DNALI1	0.428977	7.2838	1.4746e-08	1.13872e-07
SNORA54	0.427852	7.61519	6.69307e-05	0.00025647
RIMKLB	0.427596	8.06191	1.50988e-12	2.45402e-11
ZNF827	0.427439	7.30441	7.74866e-15	2.00216e-13
CFAP54	0.426501	5.2959	0.000128098	0.000463812
ERG	0.426323	7.68506	8.01617e-10	7.78133e-09
KCNJ15	0.425982	8.4006	3.67634e-05	0.000148644
PCDHGB1	0.425788	6.25721	9.09158e-14	1.8749e-12
AZIN2	0.425339	5.42383	3.68141e-14	8.2476e-13
HNRNPU-AS1	0.425053	7.60963	4.24905e-08	2.99607e-07
MAP3K14	0.424607	6.13867	7.16583e-11	8.42925e-10
LAMA4	0.424513	8.64733	5.69705e-12	8.34453e-11
NEK3	0.424499	6.38868	2.06455e-11	2.70449e-10
CD160	0.424406	4.05615	1.00285e-08	7.96768e-08
MYO15B	0.423465	6.60449	3.87345e-06	1.88556e-05
CST7	0.423384	8.19686	1.51433e-07	9.7058e-07
PTN	0.423221	5.53138	3.52942e-12	5.35662e-11
DDX58	0.423169	6.94791	3.35965e-07	2.02122e-06
KMT2A	0.422968	8.49539	2.08042e-26	7.88758e-24
CCDC80	0.422146	7.03727	0.0103419	0.0233818
TMEM176B	0.421885	7.21966	2.65272e-08	1.9478e-07
ACADL	0.421245	6.77339	0.000154214	0.000548598
GRAMD1C	0.4208	5.74988	3.87478e-08	2.75483e-07
GZMB	0.420426	6.60385	4.32406e-06	2.08279e-05
SNORA80E	0.420284	10.2505	0.00094086	0.00279521
FMO6P	0.420009	4.52698	3.68446e-09	3.16786e-08
DACT1	0.41976	5.83844	5.78127e-15	1.53196e-13
HSPB8	0.419422	8.01739	9.36739e-05	0.000348121
NEO1	0.41936	8.10911	1.81701e-07	1.14558e-06
LRRC49	0.41933	6.36127	1.0273e-10	1.16801e-09
HOXA-AS2	0.419161	3.88126	7.93672e-11	9.24778e-10
TBC1D19	0.419146	7.11469	2.18425e-16	7.93046e-15
RAB37	0.418986	5.25104	7.52081e-20	5.81462e-18
TEX9	0.418921	4.54837	2.56505e-06	1.29368e-05
CARF	0.418825	5.98265	1.5285e-14	3.68922e-13
CLIC5	0.418734	8.06332	2.28214e-05	9.58099e-05
PALMD	0.418661	8.15799	5.8134e-07	3.3356e-06
FRMD3	0.418588	6.37662	1.91035e-08	1.44467e-07
MUC20	0.418367	5.76065	8.1747e-08	5.49526e-07
CMYA5	0.418351	4.62092	3.77677e-14	8.43251e-13
ITM2A	0.418267	7.31562	1.08449e-05	4.85817e-05
RAMP2-AS1	0.418201	6.09144	1.62589e-15	4.84939e-14
SNORA75	0.417877	6.88542	0.000604267	0.00188469
MET	0.417783	7.91824	1.13875e-05	5.07814e-05
PCDHGB2	0.416856	6.71497	1.22518e-11	1.6739e-10
RASSF5	0.416833	8.04729	4.228e-11	5.24905e-10
GAS2	0.416796	4.36292	5.82526e-18	3.08723e-16
ZNF382	0.415617	4.62889	1.79772e-08	1.36789e-07
SATB1	0.414853	7.60541	2.12929e-20	1.92564e-18
RUNX1T1	0.414596	7.03641	3.73695e-06	1.82406e-05
MYB	0.414183	5.87713	6.4134e-05	0.000246822
OSBPL6	0.413955	6.14652	2.73866e-08	2.00047e-07
MYBL1	0.413796	5.69888	5.92636e-05	0.000230087
SERTM1	0.413712	7.22716	0.000741003	0.0022569
HLA-DQA2	0.413698	6.90477	0.00126362	0.00363843
BACH2	0.413442	5.8648	7.3938e-17	2.93889e-15
OR56B1	0.413047	4.42724	2.35926e-18	1.37206e-16
HELB	0.413017	5.51725	1.02495e-12	1.72991e-11
IKZF2	0.412953	6.32658	8.2421e-17	3.23048e-15
MEF2C	0.412444	8.93683	3.53456e-10	3.64456e-09
RNF150	0.412415	6.24908	3.73622e-11	4.6768e-10
PRICKLE1	0.412204	8.01011	4.02696e-05	0.000161628
SCARNA5	0.411985	8.45382	8.81213e-05	0.000329348
KLHL13	0.411576	4.22643	2.24268e-15	6.49256e-14
CD40LG	0.411386	4.10484	0.000670392	0.00206544
CDK6	0.411183	6.7096	2.07845e-09	1.86512e-08
THY1	0.41116	5.71118	0.00573821	0.0140289
ADAMTS12	0.4111	6.27599	2.38582e-10	2.53293e-09
SUSD2	0.410956	9.79675	1.25852e-06	6.73136e-06
CXCL13	0.410513	3.84527	0.0135138	0.0295994
ZNF90	0.410194	5.61556	8.25922e-08	5.54978e-07
LOC642131	0.410129	5.5783	0.000904108	0.00269782
MAP3K7CL	0.41005	5.99019	2.20184e-13	4.22681e-12
RIC3	0.409968	5.49102	2.98853e-09	2.61513e-08
PDE1C	0.409946	5.79168	1.43459e-09	1.33033e-08
DUSP19	0.409584	4.51682	2.24722e-13	4.30554e-12
LCK	0.409383	6.28659	4.31675e-08	3.03837e-07
C5	0.409286	6.79221	6.91801e-05	0.000264473
DENND5B	0.408652	5.72607	1.2129e-18	7.35764e-17
BTBD8	0.408612	3.96401	1.83317e-09	1.66318e-08
CYGB	0.408595	7.04533	5.96919e-13	1.05074e-11
AADAC	0.408298	4.49379	0.00086937	0.0026052
OLFML3	0.407852	7.21647	2.42162e-08	1.79011e-07
ANGPT1	0.406825	7.46469	7.62181e-08	5.1425e-07
CDC14A	0.406481	7.90823	9.31677e-14	1.91333e-12
DHRS9	0.406358	5.07776	4.26322e-06	2.05751e-05
SEPTIN6	0.40622	7.25112	4.53137e-08	3.17695e-07
FAS	0.406043	7.82737	8.50522e-16	2.72651e-14
CD4	0.405529	7.21622	1.71112e-06	8.92217e-06
CAPN13	0.405454	6.22349	6.0176e-06	2.83008e-05
FLJ20712	0.405363	4.74397	1.5719e-13	3.1177e-12
ADCY8	0.405171	4.90528	1.18115e-09	1.11418e-08
LIF	0.404607	4.57444	2.47019e-05	0.000102981
BAZ2B	0.404495	8.32789	2.13219e-15	6.20001e-14
SSPN	0.404276	6.39343	5.54213e-16	1.8302e-14
RHEX	0.404236	6.00048	1.33954e-05	5.88707e-05
PRTG	0.404047	6.65826	1.67169e-05	7.19436e-05
ZNF808	0.403582	7.42994	1.17738e-14	2.92712e-13
ZNF608	0.403377	7.57325	1.40516e-10	1.55372e-09
MUC16	0.403209	5.28814	0.00073251	0.00223413
RTTN	0.402935	6.29248	1.59146e-20	1.54328e-18
OVCH1	0.402821	4.67761	4.13092e-09	3.51519e-08
SCARNA6	0.402803	8.13112	2.45387e-06	1.24205e-05
AMY2B	0.402353	6.00551	1.42731e-06	7.54204e-06
CHL1	0.402091	6.60501	2.38104e-06	1.20736e-05
TMEM47	0.402083	9.43905	3.2091e-06	1.58843e-05
CXorf21	0.401666	4.30393	8.20836e-07	4.57399e-06
ST6GALNAC2	0.401254	7.92032	2.88115e-06	1.43984e-05
ZC2HC1A	0.400858	7.59856	7.22093e-11	8.47385e-10
MXRA5	0.400491	6.66845	0.000594379	0.0018562
CSF1	0.400185	8.18869	3.36376e-05	0.000136904
GRAMD2A	0.400165	6.33982	2.53515e-08	1.86773e-07
CD300LG	0.399974	6.4307	4.851e-09	4.08533e-08
SOSTDC1	0.399967	6.22278	0.00115897	0.00336711
CCDC30	0.399863	4.39248	1.14973e-07	7.53055e-07
DUSP26	0.399703	5.51119	2.75777e-11	3.52361e-10
CTSK	0.399617	8.01377	0.00408146	0.010348
CD34	0.399249	9.19761	0.000418641	0.00135281
CFAP126	0.399143	5.02226	0.0112784	0.0252416
BTN3A2	0.398665	7.33587	7.52606e-06	3.48137e-05
SMOC2	0.398361	5.71568	2.12644e-08	1.591e-07
ADIRF	0.398263	8.87285	1.31126e-08	1.0226e-07
KCNA3	0.398253	6.64106	3.05626e-06	1.51927e-05
DPY19L2P2	0.398008	4.50597	4.15636e-06	2.01136e-05
ATP9A	0.397823	6.86749	9.70593e-19	5.96113e-17
ADGRB3	0.397762	5.38562	2.78752e-09	2.45011e-08
CYB5R2	0.397143	6.73515	3.21026e-10	3.33458e-09
TMEM74B	0.396584	5.36645	6.00848e-09	4.97719e-08
TTC12	0.39645	6.06383	8.25555e-10	7.98225e-09
NLGN4X	0.396312	5.81402	1.33939e-05	5.88707e-05
UBQLNL	0.396241	4.77581	3.05549e-11	3.87639e-10
ENPP2	0.39619	8.32279	0.000126204	0.00045754
MTURN	0.39617	7.40131	3.73495e-09	3.20708e-08
DDX60	0.39574	6.69834	4.31196e-08	3.03608e-07
PRELP	0.395611	8.65237	4.81227e-05	0.00019028
TRAV26-1	0.395557	4.51893	4.50771e-06	2.16385e-05
TRGV9	0.395521	5.18254	0.00321871	0.00837935
MIR570HG	0.395108	6.83286	0.000242276	0.000825235
ADCY10P1	0.394895	4.31796	1.77621e-08	1.35361e-07
CIITA	0.394685	7.58077	0.000127806	0.000462925
KPNA5	0.394249	6.12365	3.42777e-12	5.22648e-11
IGLL5	0.394019	7.41728	7.85737e-07	4.39455e-06
SMPD3	0.393776	5.34023	1.65728e-07	1.05432e-06
ODF2L	0.39358	6.04187	1.07796e-09	1.02222e-08
CFAP43	0.393434	4.58355	0.0136733	0.0298991
LRRC17	0.393316	4.0469	1.27418e-07	8.27144e-07
CTNND2	0.393013	5.50612	6.22848e-15	1.64384e-13
HLA-DRA	0.39225	11.3609	1.20419e-11	1.64865e-10
KANSL1L	0.392193	7.1906	9.05606e-09	7.25184e-08
GABBR1	0.391697	7.25179	4.97028e-06	2.36975e-05
VSIG2	0.391488	8.06136	1.66832e-14	4.0062e-13
GATA3	0.391365	5.97165	6.39188e-09	5.25943e-08
PTPRC	0.391098	8.36939	3.70543e-08	2.64683e-07
FMO4	0.390871	6.01963	5.74075e-12	8.39606e-11
EDIL3	0.39069	8.40524	2.94587e-05	0.000121096
CACNA1C	0.390639	6.79723	2.19022e-11	2.85772e-10
RERGL	0.389437	3.24795	3.43097e-10	3.5433e-09
PMS2P5	0.389304	6.93517	7.17769e-11	8.43315e-10
ARHGAP42	0.389301	6.93242	6.5308e-08	4.45056e-07
FAM71A	0.389045	4.44261	0.000180861	0.000633224
FGF14	0.388937	5.26982	4.62317e-07	2.70462e-06
MTMR9LP	0.388232	6.75101	7.18276e-10	7.02073e-09
FAM227B	0.388192	4.4037	1.28335e-11	1.74612e-10
PCDHGA12	0.388091	5.03454	5.28999e-10	5.29671e-09
ZNF559	0.387951	6.09462	6.47763e-10	6.40133e-09
PLSCR4	0.387813	7.77537	1.19272e-10	1.33909e-09
GIMAP8	0.387168	7.4085	5.60396e-08	3.87152e-07
PTPRCAP	0.386699	7.58795	1.02769e-06	5.59386e-06
COL21A1	0.386301	5.65924	9.55529e-13	1.6209e-11
RRAS	0.386101	9.82703	9.93839e-06	4.4857e-05
NDRG2	0.386014	8.86364	8.91658e-14	1.84409e-12
RAC2	0.385416	8.41897	5.15797e-08	3.57809e-07
DOCK10	0.3846	8.02294	6.27028e-10	6.20576e-09
LOC100131510	0.38444	4.43923	5.93775e-11	7.09472e-10
DST	0.383588	9.00989	8.91721e-16	2.83553e-14
MUSTN1	0.383483	6.54153	1.40047e-06	7.41015e-06
IFNG	0.3834	3.97785	0.000314926	0.00104577
ARHGEF25	0.383298	6.07897	4.27125e-13	7.74679e-12
PLAGL1	0.383285	7.90503	3.73943e-16	1.27495e-14
FSCN1	0.383194	7.13047	0.000663353	0.00204632
XCL1	0.383093	4.91573	0.00208684	0.00572611
ZNF594	0.382794	5.78036	0.000175426	0.000616052
GVINP1	0.382673	6.61079	5.85445e-08	4.02723e-07
ZNF521	0.382522	6.27302	5.11795e-07	2.9729e-06
PTGER4	0.382501	7.96701	3.1551e-12	4.85202e-11
TCEA3	0.382355	7.84054	7.45433e-10	7.27535e-09
CYB5D1	0.381991	6.76688	3.31654e-06	1.63423e-05
POPDC2	0.381503	4.81664	3.44739e-13	6.34004e-12
NR3C2	0.381406	7.11191	6.45099e-17	2.61153e-15
ST6GALNAC5	0.380844	7.29934	3.53198e-05	0.000143337
GPR15	0.380726	4.70432	0.000724738	0.0022142
CAPRIN2	0.380692	5.75278	2.91859e-11	3.71706e-10
NPHP3	0.380473	4.76582	7.72313e-12	1.09857e-10
FCGR2B	0.380006	7.73578	9.6804e-05	0.000358874
PRRX1	0.379718	7.54277	9.67114e-07	5.30366e-06
CFAP47	0.379628	4.50392	0.0111186	0.0249236
MAP3K15	0.379313	4.48528	1.31371e-14	3.22941e-13
LOC100130100	0.379173	4.68673	6.70694e-08	4.56271e-07
SPRY4	0.37909	8.2625	5.91502e-05	0.000229783
EPHA7	0.379069	4.37434	6.0364e-07	3.4525e-06
PTCH1	0.378593	7.25492	7.4211e-08	5.01395e-07
NID2	0.378589	6.62669	1.53479e-07	9.81777e-07
PPIL3	0.37831	7.62636	7.80845e-13	1.34314e-11
ZC3H12B	0.378112	4.56471	1.37562e-22	2.3537e-20
PLA2G6	0.378087	5.60675	5.57902e-10	5.56913e-09
PGM5	0.377864	5.67061	3.91408e-09	3.34777e-08
SLC9A9	0.377127	7.22196	1.43357e-10	1.58335e-09
MSC	0.377002	5.1569	8.60055e-06	3.92863e-05
APOBEC3D	0.376924	7.00616	6.2391e-07	3.56326e-06
ERRFI1	0.376665	8.8567	5.09743e-05	0.00020031
CEP68	0.376465	6.30706	1.67275e-19	1.19486e-17
DRD1	0.376236	4.17793	3.64948e-15	1.00629e-13
INTU	0.375691	4.94745	2.92608e-12	4.52452e-11
ARHGEF28	0.375497	6.27644	8.94495e-10	8.58986e-09
SLC16A4	0.375289	6.61164	1.38067e-06	7.31913e-06
RNF152	0.375203	6.88892	6.86732e-12	9.86802e-11
LOC153684	0.374955	6.14689	5.87002e-11	7.03083e-10
NMUR1	0.374891	6.50023	2.85358e-13	5.35284e-12
LRMP	0.374816	6.59725	4.8481e-09	4.08463e-08
CHD6	0.374709	7.72437	9.4822e-25	2.45976e-22
ATM	0.374603	7.64259	1.32583e-11	1.79771e-10
ZNF286A	0.374231	6.08373	0.000908995	0.00270959
RASGEF1B	0.373651	8.5928	1.10162e-06	5.96662e-06
KCNT2	0.373576	5.57828	2.75451e-05	0.000113799
APOBEC4	0.373565	4.18834	0.00246722	0.00663762
SLAMF1	0.373438	4.47082	1.43951e-05	6.28154e-05
FOLH1	0.373119	4.19539	7.07514e-09	5.7639e-08
RASGRP3	0.373103	6.4871	0.0032168	0.00837548
SEC31B	0.37306	5.66215	2.47399e-07	1.52564e-06
FNBP1	0.372947	8.14198	2.29659e-19	1.59991e-17
CCND1	0.372877	8.66559	8.05605e-05	0.000303448
CR2	0.372144	3.33631	0.00171507	0.0047961
ZNF618	0.371977	5.99816	1.53712e-17	7.30227e-16
ZHX2	0.371924	7.86724	2.44596e-15	7.00901e-14
AR	0.371678	5.90196	7.52579e-16	2.42436e-14
ZC3H12A	0.37167	7.24254	0.000130303	0.00047093
TSPAN18	0.371572	7.86421	9.6637e-05	0.000358322
TMEM108	0.371486	6.59562	1.06219e-08	8.41007e-08
LINC02145	0.371265	5.30424	4.21991e-09	3.57997e-08
OGT	0.37121	9.05619	8.2237e-12	1.16056e-10
CSPP1	0.37119	6.60434	9.61224e-09	7.66608e-08
AK5	0.371006	2.85042	1.93639e-15	5.68094e-14
LCAT	0.370977	7.02478	7.77903e-09	6.30088e-08
CYP2U1	0.370262	6.01127	2.06794e-13	3.99604e-12
PRH1	0.37016	3.85093	1.24535e-06	6.66811e-06
SERPINB9	0.369953	7.8114	1.07675e-07	7.09024e-07
SCAI	0.369582	6.84927	2.5014e-14	5.78816e-13
ZNF585B	0.369496	6.18994	3.88121e-09	3.32399e-08
OR51B4	0.369268	3.95865	1.57764e-07	1.00788e-06
BMS1P21	0.368964	5.47602	4.13221e-06	2.00016e-05
C1orf87	0.368481	5.18387	0.00630937	0.0152307
IL12RB2	0.368296	4.36292	5.52094e-06	2.61145e-05
TCEA2	0.368283	6.78085	1.55158e-11	2.08007e-10
AMOT	0.367892	5.86184	8.06806e-10	7.82399e-09
NCAM2	0.367291	6.44488	6.70838e-06	3.13106e-05
WDFY3-AS2	0.367272	5.79247	2.52685e-16	9.09066e-15
LOC692247	0.366997	5.53356	5.46926e-07	3.15651e-06
THBS3	0.36694	5.76069	7.37752e-08	4.98621e-07
PRKCQ	0.366901	6.91648	1.26699e-10	1.41443e-09
RRAD	0.366886	5.86455	6.37854e-07	3.63763e-06
NFKBID	0.366673	6.49422	1.87612e-09	1.69981e-08
NUMA1	0.366625	7.89439	1.23563e-20	1.24288e-18
CEP85L	0.366568	5.82524	2.12685e-15	6.19362e-14
JAML	0.366225	7.98396	1.21925e-05	5.41028e-05
ATF7IP	0.365889	9.57147	1.8094e-14	4.32982e-13
DLG2	0.365836	4.96615	1.22704e-10	1.37527e-09
RHOH	0.365701	6.31183	8.60556e-06	3.93001e-05
ITK	0.365697	6.78595	0.000235826	0.000805773
AOAH	0.365294	8.41452	2.15939e-05	9.09667e-05
TNFAIP3	0.365164	8.89522	0.000194458	0.000676383
PLCL1	0.365142	4.86706	6.21473e-14	1.33033e-12
PPP1R12B	0.365086	7.26374	3.77019e-15	1.03523e-13
CCL4	0.365012	4.39831	0.00529454	0.0130559
LRRC1	0.364887	7.20891	4.95509e-07	2.8851e-06
CALCRL	0.364844	9.6766	0.000666044	0.00205333
PGR	0.36474	4.35329	1.40067e-15	4.22884e-14
NKAPP1	0.364604	6.14849	3.51126e-12	5.33316e-11
RNF125	0.364379	6.37199	1.17458e-07	7.68309e-07
SLC6A1	0.364204	5.74224	6.43425e-07	3.66728e-06
TMEM8B	0.364175	6.55936	5.28961e-17	2.20475e-15
CCDC170	0.364027	5.19825	9.25115e-06	4.19858e-05
AHR	0.363874	9.62892	9.20625e-09	7.36313e-08
ARHGEF15	0.363258	7.04524	1.23541e-08	9.6805e-08
PNISR	0.363174	8.30132	1.21728e-08	9.54221e-08
FAM3B	0.362132	6.43709	0.000621159	0.00192974
BCL6B	0.362059	7.4716	1.08972e-05	4.87832e-05
LRIG1	0.362029	8.13485	7.28101e-12	1.04018e-10
TRERF1	0.361638	6.05399	2.61451e-13	4.93726e-12
MLLT3	0.361598	7.00676	1.48572e-09	1.37259e-08
ADAMTS10	0.361451	6.31654	2.21618e-10	2.36942e-09
RNF180	0.361323	7.35902	1.59991e-08	1.23115e-07
CCR7	0.36127	6.13593	0.00147796	0.00419916
CC2D2A	0.36065	6.24147	5.1721e-11	6.26338e-10
AKAP5	0.360304	4.66308	7.22174e-06	3.35241e-05
DRC3	0.359875	5.36394	0.00148229	0.00420788
TBX19	0.359606	5.87797	2.80003e-16	9.9824e-15
EFCC1	0.359261	7.38003	2.13956e-10	2.28997e-09
SELL	0.359228	6.57375	9.73387e-05	0.000360652
ZNF254	0.35907	7.68407	2.37737e-09	2.11506e-08
TP63	0.359024	5.32008	0.000191014	0.000665815
VAMP1	0.358932	6.51454	1.93137e-10	2.08298e-09
SEPTIN4	0.358929	7.03651	7.99642e-15	2.05273e-13
ADD3	0.358926	8.14024	6.24091e-13	1.09466e-11
CYP4X1	0.358919	7.50758	9.76512e-07	5.34925e-06
TIFAB	0.358708	4.2995	3.65986e-06	1.78998e-05
PKNOX2	0.35852	7.1135	7.13287e-07	4.0282e-06
MAML2	0.358389	8.50606	7.70616e-13	1.3282e-11
AMZ2P1	0.358357	6.28943	3.93656e-12	5.92231e-11
NFIA	0.357591	8.79128	9.20718e-11	1.05657e-09
ERBB3	0.356883	7.23663	1.42453e-12	2.32874e-11
HSPA1A	0.35576	8.98236	1.36638e-05	5.99425e-05
SNORA49	0.355314	7.4461	5.00179e-06	2.38341e-05
CDK11A	0.354906	6.63176	0.000329263	0.0010888
GPLD1	0.354832	4.6914	8.91911e-09	7.15499e-08
TTLL1	0.354388	6.61728	3.53672e-15	9.84435e-14
RGS22	0.354287	4.27644	2.90961e-05	0.000119656
NLRP1	0.354245	6.98862	7.84418e-07	4.38967e-06
SNORD61	0.353763	4.57825	0.00113956	0.00331853
LETM2	0.353441	4.37556	2.72622e-09	2.39943e-08
CACNA1D	0.352806	7.69516	1.85136e-06	9.56989e-06
TCTEX1D1	0.3527	5.36073	5.59757e-05	0.000218441
LIMA1	0.352676	8.96692	2.11602e-16	7.72542e-15
PEG3	0.352016	4.84412	1.74006e-08	1.33118e-07
HIST1H2AE	0.351972	5.20391	4.65985e-06	2.23145e-05
CYP4B1	0.35195	9.74665	3.8271e-05	0.000154266
TXNDC16	0.351924	4.14373	8.13049e-10	7.87679e-09
RASD2	0.351709	5.47624	9.89702e-10	9.44433e-09
ITM2C	0.351421	8.10757	4.17486e-07	2.46503e-06
LIFR	0.351308	9.35611	5.66069e-05	0.000220642
FDCSP	0.351285	3.39759	0.00469349	0.01171
MROH9	0.35122	3.62994	0.000314725	0.00104536
BCL2	0.351077	6.5836	1.82596e-20	1.72243e-18
TARBP1	0.350799	6.39947	5.31913e-10	5.32048e-09
JMY	0.350372	6.67554	6.10045e-13	1.07288e-11
CYP2E1	0.350329	5.00374	3.37654e-10	3.48892e-09
ZNF204P	0.350301	5.74748	0.000314748	0.00104536
CTPS2	0.349793	7.06652	9.30968e-15	2.36077e-13
ANKS1B	0.34967	4.59309	2.00176e-08	1.50628e-07
GZMH	0.349562	5.5212	1.4147e-05	6.1842e-05
ITGB7	0.349551	6.33087	4.6293e-05	0.000183709
TUT4	0.349234	7.41194	7.8492e-15	2.02548e-13
HTRA3	0.349016	6.51974	8.44788e-10	8.15621e-09
ZNF432	0.348872	5.47094	7.00225e-12	1.00181e-10
PCDHGA6	0.348739	4.30343	1.36856e-09	1.2751e-08
RGS6	0.348706	5.10239	3.73521e-07	2.22342e-06
CCDC7	0.348699	5.61471	8.11042e-12	1.14756e-10
RHOBTB1	0.348587	6.92985	1.97789e-12	3.12954e-11
CDH11	0.348547	9.17129	1.33616e-06	7.12341e-06
CDR1	0.348483	7.3963	2.01909e-05	8.55681e-05
PVRIG	0.348394	7.42767	1.09669e-08	8.66931e-08
BMP2	0.348355	7.5667	0.00148132	0.00420688
LEF1	0.348319	6.73939	3.18274e-05	0.000130128
LOC100508226	0.348123	7.09812	2.11173e-05	8.92067e-05
OMA1	0.347882	6.41686	1.84259e-13	3.60025e-12
DMD	0.347845	6.84362	7.67462e-10	7.47555e-09
CEACAM1	0.347687	6.69834	0.000321733	0.00106587
SH3BGRL	0.347648	9.61037	9.45605e-08	6.26625e-07
MDGA1	0.347545	5.20076	7.09285e-07	4.00905e-06
THADA	0.347477	7.71156	1.23255e-12	2.04199e-11
TTLL9	0.347132	5.03139	0.000382736	0.00124845
RGL3	0.346974	5.98102	2.27335e-08	1.69256e-07
TLL1	0.346971	5.67538	0.00142518	0.00406209
SELENOP	0.345988	10.293	1.24647e-06	6.6723e-06
LBH	0.345766	9.08619	1.14791e-05	5.11553e-05
MIR600HG	0.345306	5.22992	1.65629e-07	1.05402e-06
OR52N1	0.345293	4.45377	0.00674047	0.0161468
IGHGP	0.344961	8.18184	0.00342623	0.00885413
EBF1	0.344451	6.75139	5.08956e-07	2.95728e-06
ANK3	0.344403	7.62949	8.9994e-07	4.96844e-06
WDR27	0.344173	5.77829	1.10166e-09	1.04369e-08
SNORD116-25	0.343404	4.62024	0.000751447	0.00228482
CPXM2	0.343104	5.12756	4.61611e-05	0.000183222
ARRDC3	0.342799	10.1697	1.52731e-07	9.7826e-07
RAD51B	0.34279	5.97901	1.82798e-11	2.41708e-10
PTPN21	0.342563	7.08914	2.20329e-08	1.64351e-07
AGER	0.34251	10.1958	0.000121439	0.000442055
CMAHP	0.342502	8.10317	0.00676527	0.0161964
ARID5A	0.342467	7.34564	0.000424852	0.00137034
TMEM35A	0.342447	5.35574	3.13737e-18	1.78252e-16
VWA3B	0.34197	4.87243	0.00282452	0.00748559
KIF13A	0.341947	7.6889	8.54898e-16	2.73165e-14
KDM6B	0.341736	7.34951	0.000104384	0.000384661
HHAT	0.341538	5.74035	5.94328e-16	1.95286e-14
CNTN6	0.341367	6.40463	4.4368e-07	2.6072e-06
GALNT16	0.341257	5.57864	2.2684e-11	2.95192e-10
PCDHGB6	0.3409	3.72514	7.16161e-11	8.42925e-10
PARD6B	0.34072	8.48631	9.1093e-07	5.01788e-06
PTPRD	0.340373	7.01084	5.62995e-08	3.88772e-07
RAB30	0.340151	6.65217	4.51776e-05	0.000179608
PSMB9	0.339523	8.21169	5.26842e-05	0.000206577
DYNC2H1	0.339454	5.81115	3.02434e-07	1.83461e-06
LINC00260	0.339393	4.32791	3.70201e-05	0.00014956
FGF1	0.33933	3.83659	2.91885e-10	3.0528e-09
EFCAB6	0.339146	4.95963	3.9899e-06	1.93746e-05
CLIC6	0.339089	6.60367	0.000649794	0.00201047
DMTF1	0.33881	8.18987	8.57561e-09	6.90074e-08
TTBK2	0.338681	7.32276	7.26965e-21	7.83176e-19
DOCK6	0.338604	7.35215	1.48895e-05	6.47146e-05
VEGFA	0.338529	9.03993	4.86004e-09	4.09119e-08
NEB	0.338467	4.61015	3.75308e-07	2.23271e-06
TUBG2	0.338444	7.13492	2.52397e-10	2.6681e-09
ADAM19	0.338422	7.53142	1.58335e-06	8.30695e-06
LST1	0.338282	8.45219	2.20592e-06	1.12318e-05
ABCB1	0.338279	4.76787	0.000866983	0.00259844
GNG11	0.338255	8.71209	0.000300598	0.00100327
SH2D2A	0.337964	6.00622	4.19497e-06	2.02805e-05
SGSM1	0.337954	5.75995	2.39487e-10	2.54116e-09
SLC4A8	0.337707	5.0953	3.17205e-12	4.87427e-11
HIVEP1	0.337539	7.90722	3.53861e-07	2.11855e-06
WDR17	0.337523	5.26368	1.59972e-07	1.02033e-06
ATP2B1	0.33751	7.76888	1.6561e-09	1.51861e-08
ZNF266	0.337506	7.25407	0.000148062	0.000528814
SLFN13	0.337224	6.29734	1.44103e-09	1.33505e-08
CD8A	0.337131	6.8533	2.85295e-05	0.000117497
NPR2	0.337084	6.45514	6.94296e-17	2.78779e-15
FASLG	0.336895	4.93364	1.5476e-09	1.42508e-08
UGT2B4	0.336648	3.61622	6.31876e-05	0.000243738
COLCA1	0.336574	5.96261	1.62328e-06	8.49336e-06
FARP2	0.336481	6.82886	4.89422e-16	1.63265e-14
B3GALT2	0.33632	5.19521	0.00357614	0.00919492
MIR30E	0.336078	5.31126	4.31675e-07	2.54499e-06
WDR78	0.335622	5.30849	0.000120976	0.000440694
LYRM9	0.335593	3.36814	1.02253e-08	8.1091e-08
DNAJC5B	0.33542	4.74728	1.13416e-05	5.0611e-05
DNAH1	0.335248	6.28705	1.08768e-05	4.87132e-05
MLLT6	0.335227	7.88213	5.23762e-13	9.32789e-12
DACT2	0.335097	6.05862	3.32911e-10	3.44352e-09
FGGY	0.334847	6.1267	2.4429e-13	4.65781e-12
DPEP2	0.334774	6.76617	1.76312e-08	1.34468e-07
AIF1L	0.334764	6.70252	1.82959e-07	1.15241e-06
PPM1K	0.334651	5.92656	9.64211e-10	9.21399e-09
RCAN2	0.334384	7.18127	4.07599e-07	2.41316e-06
PCDHGA7	0.334204	3.71407	1.12161e-10	1.26549e-09
ITGA1	0.334124	9.1594	3.83368e-06	1.8685e-05
HES1	0.333933	7.20396	0.000245774	0.000836286
DIXDC1	0.333737	5.87195	2.63862e-13	4.97803e-12
SERINC5	0.333466	8.62458	2.71531e-12	4.22512e-11
SMURF2	0.333301	8.76475	6.00189e-11	7.16266e-10
ST8SIA1	0.333007	4.70362	1.23424e-17	6.05302e-16
CIRBP	0.33297	9.29105	2.60428e-17	1.16425e-15
NMNAT3	0.332885	6.16674	2.99867e-15	8.49409e-14
NFKB2	0.332345	7.12683	0.000548656	0.0017293
NOD1	0.332148	6.82331	3.92476e-09	3.35492e-08
SIGLEC6	0.331988	6.27123	6.57185e-10	6.49118e-09
SERTAD4	0.331977	5.33345	6.60349e-05	0.000253382
LAMA3	0.331857	7.89993	3.03523e-07	1.84009e-06
COL6A5	0.331782	5.48314	0.0322539	0.0631466
CLSTN2	0.331482	5.73643	2.7846e-07	1.69964e-06
MOK	0.331298	5.03209	5.95443e-07	3.41255e-06
MTA3	0.331197	7.78701	1.06715e-10	1.20843e-09
RUFY3	0.330855	8.10469	2.43565e-08	1.79913e-07
RCAN1	0.330499	7.40792	1.10217e-06	5.96795e-06
ANKRD20A8P	0.330394	3.58679	4.13158e-06	2.00016e-05
SCD5	0.330147	6.98592	4.88761e-05	0.000193027
PATL2	0.32991	5.25906	9.08617e-08	6.04977e-07
LOC150776	0.329761	7.74284	4.64567e-05	0.00018421
NOTUM	0.329745	5.28005	1.63917e-10	1.79037e-09
TNXB	0.329694	7.55343	3.48121e-09	3.01018e-08
RFX3	0.329418	6.05401	6.0548e-09	5.01346e-08
VSIG1	0.329402	3.8913	2.64788e-05	0.000109693
ACCS	0.329174	6.10401	0.000108203	0.00039762
TRAV9-2	0.328922	5.11351	3.47648e-08	2.49413e-07
MGP	0.328876	10.4221	4.65232e-08	3.2525e-07
GNG7	0.328749	6.84255	9.98368e-13	1.68806e-11
TIAF1	0.328728	6.33321	5.12681e-06	2.43907e-05
CHRNA1	0.328697	4.65002	0.0021529	0.00588524
KIZ	0.328304	6.53185	1.5453e-15	4.63707e-14
SLC1A2	0.327897	3.85614	1.03338e-11	1.43572e-10
ZNF91	0.32766	7.76834	2.59048e-05	0.000107564
ART4	0.327262	5.5367	0.00929343	0.0212997
MGC57346	0.327078	7.30888	5.52018e-08	3.81861e-07
FAM172A	0.326884	7.03842	1.71145e-09	1.56282e-08
SUZ12P1	0.32675	8.29875	0.00813523	0.0190053
PBXIP1	0.326632	6.97519	1.40243e-13	2.79565e-12
SLC5A4	0.326153	5.57535	0.00175313	0.00489006
CDON	0.325954	6.26608	1.55618e-05	6.73816e-05
TRBV25-1	0.325724	3.7022	0.000703359	0.00215422
MICU3	0.32569	5.95755	1.99024e-07	1.24497e-06
RAB23	0.325628	5.64442	5.94331e-05	0.0002307
FYB2	0.325582	4.26214	0.00031904	0.00105765
CCL11	0.325451	5.63928	2.04097e-05	8.64028e-05
SOS1	0.325366	8.42666	1.17469e-10	1.31961e-09
HLA-DRB6	0.325173	11.4769	0.00326318	0.00848281
CCDC190	0.324672	3.70797	0.00226301	0.00614963
TRAV27	0.324606	3.93623	0.000836688	0.00251798
CWF19L2	0.324562	5.97098	4.66901e-13	8.40635e-12
ATP6V1G2	0.324507	5.25706	2.6511e-12	4.13501e-11
CLECL1	0.324247	3.55786	5.87159e-10	5.84638e-09
KCTD16	0.324131	4.7486	3.50043e-06	1.71926e-05
DET1	0.324112	5.85138	7.29364e-10	7.12205e-09
CYLD	0.323892	7.671	1.89713e-13	3.69219e-12
RBM4B	0.323692	8.46641	3.81228e-11	4.76596e-10
HOXA4	0.323604	5.79111	3.66806e-08	2.62109e-07
ZNF334	0.32338	4.88114	3.33956e-05	0.000136004
TBCK	0.323276	7.87325	8.05406e-11	9.37163e-10
PDZD2	0.32289	7.5734	2.43037e-09	2.15735e-08
SLC49A4	0.322827	8.61994	7.27047e-08	4.92568e-07
GPR18	0.322243	4.42852	1.49833e-05	6.50795e-05
FGD6	0.322131	7.32846	5.0422e-05	0.000198496
NICN1	0.322062	7.47047	2.51991e-09	2.23482e-08
ABCA5	0.321884	6.56199	1.02191e-06	5.56782e-06
C2CD2	0.321746	6.62957	5.56628e-14	1.2046e-12
TBX2	0.321733	7.62809	3.46136e-12	5.27362e-11
DCLK2	0.321626	5.79463	1.89049e-09	1.71021e-08
ELN	0.321501	8.2499	2.69241e-05	0.000111374
LRRC37A3	0.321195	5.59096	1.46676e-05	6.38244e-05
LRRCC1	0.321179	6.07795	7.397e-07	4.16663e-06
BST2	0.320956	7.08391	0.000462804	0.00148144
FAM122C	0.320874	7.21795	1.09445e-11	1.51206e-10
EXOC6B	0.320808	7.89097	1.0963e-12	1.83477e-11
DTX3	0.320769	6.16001	8.7178e-13	1.48421e-11
MFAP2	0.320753	7.46255	1.07154e-05	4.80559e-05
TMEM116	0.320661	8.21875	2.69396e-10	2.8365e-09
LEFTY2	0.320496	7.41199	5.25391e-12	7.74147e-11
FAM180A	0.320319	4.82076	7.31396e-07	4.12221e-06
BIRC3	0.318639	7.26183	0.00062202	0.00193181
IFIT2	0.318491	6.08707	0.00169009	0.00473498
RNASE4	0.318365	8.71155	2.26345e-05	9.51062e-05
FOXP4	0.318273	6.90376	2.08297e-10	2.23426e-09
FGFR2	0.318037	7.93454	0.00141591	0.00403799
SMARCC2	0.318024	8.36496	1.34741e-27	8.30128e-25
PDGFRB	0.317623	8.51073	6.39331e-12	9.26113e-11
TSPAN12	0.317611	7.94836	4.45036e-07	2.61439e-06
MALL	0.317591	7.05481	2.4819e-10	2.62785e-09
ABI2	0.317444	8.00798	3.31838e-13	6.12564e-12
CHD2	0.317413	8.46333	7.66211e-11	8.95958e-10
SETMAR	0.31711	7.13907	6.37414e-11	7.57025e-10
PCED1B	0.317044	5.83019	9.19019e-11	1.05524e-09
NLRC3	0.316787	5.19822	4.67168e-12	6.93019e-11
HTR2B	0.316651	4.31753	2.0299e-05	8.59893e-05
AMOTL2	0.316595	7.13376	2.90872e-08	2.11295e-07
SLC47A1	0.31635	6.30888	0.00117835	0.00341534
ZNF426	0.316064	6.72594	9.29662e-08	6.18363e-07
KIAA1147	0.316009	7.63879	2.13222e-09	1.91163e-08
ZSWIM5	0.315898	6.41451	1.16597e-19	8.74031e-18
LINC00472	0.315664	8.10658	1.54268e-05	6.68439e-05
ZNF846	0.315571	3.65977	4.66428e-10	4.70847e-09
HCAR3	0.315528	4.00888	0.000159939	0.000567633
POLI	0.315494	7.64153	2.29294e-06	1.16509e-05
ZNF362	0.315454	7.57099	2.12206e-13	4.08159e-12
CRIPT	0.315034	7.2633	2.20383e-05	9.27592e-05
GCC2	0.315028	7.52803	2.74627e-09	2.41493e-08
ACTR3C	0.314711	6.01553	0.000800778	0.002421
PRKN	0.314701	6.41835	3.534e-12	5.35945e-11
ALS2CL	0.31458	6.46533	5.67626e-07	3.26261e-06
SNORD60	0.31457	6.49228	0.0208844	0.0434116
HEG1	0.314564	9.82108	1.88648e-06	9.73867e-06
FOXP1	0.314456	8.39453	1.34189e-18	8.06567e-17
SNORD14E	0.314276	6.18784	0.0105056	0.0237059
REM1	0.314104	5.3063	6.49042e-12	9.39338e-11
ZNF423	0.314077	5.85704	3.13618e-13	5.83299e-12
PHOSPHO2	0.313692	3.88924	3.21076e-06	1.58886e-05
N4BP1	0.313493	6.90581	2.16876e-08	1.6202e-07
RGS9	0.313353	6.15147	0.00737403	0.017465
GANC	0.313008	8.6556	1.10339e-06	5.97133e-06
FIBIN	0.312988	6.83813	0.00950862	0.0217323
ATXN1	0.312781	7.49211	1.15466e-24	2.88154e-22
KLRD1	0.312629	5.60726	0.00972606	0.0221804
FBXL20	0.312599	7.49124	1.57157e-11	2.10486e-10
PPFIBP2	0.312439	6.74198	6.07385e-12	8.85694e-11
PSIP1	0.312408	6.67359	7.35367e-09	5.97107e-08
LUC7L3	0.312309	7.29927	0.000104044	0.000383552
NBEAL1	0.312288	7.90972	3.39677e-07	2.04169e-06
SNORD114-26	0.31228	4.55055	0.000291304	0.000974887
VN1R1	0.312077	4.20185	2.28838e-12	3.59486e-11
PAN2	0.311893	7.26456	2.1027e-08	1.57623e-07
MICAL3	0.311761	6.54021	1.6049e-09	1.47508e-08
RALGPS2	0.31173	5.67254	2.54274e-06	1.28341e-05
MATN2	0.311673	5.84885	9.91182e-06	4.47576e-05
ZNF75A	0.311562	6.72455	2.40955e-12	3.77318e-11
ADGRG5	0.311166	5.99659	1.43609e-08	1.11073e-07
STXBP6	0.311115	7.55395	8.50198e-05	0.000318784
TNF	0.310787	5.4048	0.000484685	0.00154671
NR3C1	0.310583	7.90825	1.96602e-10	2.11688e-09
TNRC6C	0.31046	6.95573	3.37188e-18	1.90477e-16
SYNE2	0.310152	8.27119	7.97318e-13	1.36502e-11
BRWD1	0.310095	7.63241	1.77868e-05	7.61493e-05
FAM214A	0.309801	7.50348	8.53003e-06	3.90275e-05
SYDE2	0.309621	6.30625	4.92149e-05	0.000194171
ZNF154	0.309396	5.80976	5.35427e-07	3.09468e-06
OR8G2P	0.309215	3.33052	0.00263793	0.00704412
TTC28	0.308907	7.67983	1.12203e-10	1.26549e-09
ABCA2	0.308532	6.39064	3.78481e-11	4.73462e-10
PPP2R2B	0.308516	5.41456	4.44306e-13	8.03623e-12
DNAH12	0.307995	4.13887	0.012592	0.0278087
RNF19A	0.3077	8.58837	6.58344e-12	9.51558e-11
TGFB3	0.307615	6.67478	0.00224815	0.00612016
2022-03-08	0.307587	7.70279	3.70951e-12	5.59977e-11
LIMD2	0.307407	7.47018	2.17621e-08	1.62515e-07
EPHA2	0.307296	6.79498	0.00141403	0.00403321
RSPH4A	0.307212	5.39509	0.0140945	0.0307213
TTC21B	0.307046	6.48666	1.71512e-07	1.08796e-06
CDH2	0.306902	4.89128	2.56248e-07	1.57479e-06
ST6GAL2	0.3067	5.14247	1.39685e-05	6.11295e-05
GPR146	0.306673	7.04327	0.00089835	0.00268389
SNORD115-32	0.30665	2.84097	4.58039e-09	3.87564e-08
LGR5	0.306347	5.03198	0.00455379	0.0114085
NHSL2	0.306152	7.24146	9.164e-08	6.09953e-07
ZNF876P	0.306114	4.92802	9.33406e-06	4.22939e-05
IL7	0.306109	5.35316	1.09021e-06	5.91032e-06
TC2N	0.305904	9.30138	1.55944e-08	1.20095e-07
ZFP2	0.305852	4.73477	1.44821e-12	2.36549e-11
ZFYVE9	0.305784	6.16083	1.60691e-07	1.02459e-06
TMEM67	0.305731	5.66126	8.4472e-06	3.86845e-05
ITFG2	0.305548	7.93473	8.5642e-14	1.7773e-12
CLNK	0.305391	3.93615	8.07352e-09	6.518e-08
FAM117B	0.305329	7.67042	7.86495e-11	9.18043e-10
LRFN5	0.305296	5.10373	1.76125e-17	8.18941e-16
PHEX	0.305172	5.61136	0.00412841	0.0104536
KCNN3	0.305074	6.15431	6.49162e-06	3.03852e-05
ZBP1	0.305047	5.80888	5.75275e-08	3.96565e-07
UTRN	0.305046	9.53208	1.78075e-20	1.68786e-18
CASTOR3	0.304797	6.10683	2.67451e-11	3.42258e-10
ANKRD20A11P	0.304774	5.67884	1.91381e-05	8.14881e-05
CXCR3	0.304722	5.89925	2.78376e-06	1.39365e-05
RERG	0.304305	6.61949	4.48464e-06	2.15488e-05
MOB3B	0.304159	7.30719	2.31778e-10	2.466e-09
LMNA	0.304036	7.95005	0.00245849	0.00661967
ZNF136	0.303971	6.86003	9.40586e-12	1.31445e-10
OR2J3	0.303965	4.77367	0.00359083	0.00922868
DCBLD1	0.303945	7.23817	2.18033e-08	1.62761e-07
IL23R	0.303885	3.1616	2.70891e-07	1.65755e-06
PCDHGC4	0.303869	4.85139	1.63301e-06	8.53973e-06
CNKSR2	0.303835	5.813	3.19529e-10	3.32253e-09
RNF144A	0.303691	6.37697	8.68922e-11	1.0018e-09
UPK3B	0.303452	7.47409	0.00178353	0.00496712
BCL11B	0.303433	5.74988	7.42865e-07	4.18206e-06
CNNM3	0.303425	6.90344	3.84456e-20	3.24804e-18
RTN1	0.303385	6.16695	3.11346e-11	3.93978e-10
ZNF14	0.303324	4.38842	4.03758e-07	2.39257e-06
CCDC14	0.303278	7.07154	2.03659e-05	8.62541e-05
RNU105B	0.30318	5.73182	6.23364e-07	3.56117e-06
MAP2K5	0.302792	6.41725	7.86263e-14	1.64731e-12
CD74	0.302502	11.6378	1.03857e-13	2.1196e-12
ZNF532	0.302363	8.57002	3.08154e-15	8.70382e-14
ZNF529	0.302169	6.19925	1.00346e-11	1.39909e-10
AMOTL1	0.302079	7.86065	9.1948e-13	1.56137e-11
IGLV9-49	0.301573	6.30982	0.00248176	0.00667228
PHACTR2	0.301387	8.22264	7.05781e-10	6.91247e-09
ZNF717	0.301334	7.93457	3.82385e-08	2.72156e-07
ARHGAP28	0.301248	5.98162	0.00144962	0.00412399
TAS2R13	0.301235	4.53054	1.89679e-06	9.78678e-06
CLEC4A	0.301118	5.26658	2.26317e-07	1.40398e-06
ZNF292	0.301085	8.24331	1.41616e-08	1.09617e-07
ARMC2	0.301069	5.58937	1.71992e-07	1.0903e-06
EMP2	0.300985	10.8491	2.75288e-07	1.68132e-06
LOC388282	0.30084	4.92331	2.69479e-10	2.8365e-09
PCF11	0.300817	8.11689	6.2333e-09	5.14397e-08
ANKRD50	0.300785	7.51546	1.35489e-06	7.20464e-06
BTN2A3P	0.300595	4.77828	6.49628e-07	3.69623e-06
CXorf 22	0.30045	4.13905	0.0135551	0.0296765
PLEKHA6	0.300435	6.42755	5.44869e-08	3.7718e-07
SLC25A25	0.300233	6.28422	0.00204895	0.00563547
ASB14	0.299996	4.12236	0.00516287	0.0127626
PKD1L1	0.299949	4.69521	1.13009e-11	1.55584e-10
MYRF	0.299925	7.08071	0.000453267	0.00145374
WDR49	0.299867	5.27062	0.00900139	0.020734
DAPK1	0.299718	8.92815	1.16443e-10	1.30882e-09
FAAH2	0.299694	5.13714	1.86667e-08	1.41544e-07
CLEC3B	0.299686	7.98231	5.67228e-07	3.26127e-06
RPL23AP32	0.299648	8.19233	0.0109421	0.0245877
MAGI2	0.299619	5.7224	7.98448e-12	1.13166e-10
TUBA1A	0.299453	8.86986	5.79715e-06	2.73423e-05
TMEM71	0.299248	6.28908	8.97437e-06	4.08142e-05
DIPK1B	0.298939	6.73253	9.05419e-11	1.04084e-09
CDH6	0.298571	7.34206	0.010261	0.023215
LGALS2	0.298535	4.60859	4.41541e-05	0.000175822
SLC22A17	0.298499	7.57909	4.41437e-14	9.71309e-13
PCDHB11	0.298427	5.09209	7.98938e-09	6.4633e-08
LOC101060181	0.298205	5.67299	0.000200907	0.000696426
TMEM35B	0.297878	8.85467	9.56701e-05	0.000355071
DGKE	0.297629	6.10709	7.85414e-07	4.39399e-06
PMS2P4	0.297573	6.64098	0.00142988	0.0040743
CARD16	0.297417	6.08747	0.0004692	0.00150021
ICAM3	0.297296	7.05245	8.41368e-07	4.67892e-06
DYRK3	0.297271	6.27726	0.000672447	0.0020708
SAMD12	0.297252	6.76398	1.12637e-05	5.03092e-05
NMUR2	0.297164	5.10778	0.00147833	0.00419962
STRBP	0.297079	5.53727	4.04504e-07	2.39627e-06
RARB	0.297053	6.17568	0.000249906	0.000849465
CEP95	0.296932	7.49603	3.67253e-09	3.16037e-08
CABCOCO1	0.296612	4.12381	0.00515315	0.0127407
CDHR4	0.29659	6.29607	0.0027691	0.00735413
ZBTB37	0.296544	6.50662	9.5132e-11	1.08789e-09
LAMP5	0.296484	4.27825	5.58535e-06	2.64002e-05
CCL28	0.29633	5.77848	5.03402e-10	5.05581e-09
RBM43	0.29625	5.39944	9.87445e-07	5.40613e-06
ARID4A	0.295956	6.634	5.22844e-05	0.000205132
ZNF221	0.295884	4.56164	2.27134e-07	1.40772e-06
SHC3	0.295611	7.70369	0.000309964	0.00103051
POU6F1	0.295554	6.4045	4.08468e-09	3.48161e-08
ITGB6	0.295499	9.32813	5.05728e-05	0.000198971
SPATA18	0.295482	6.30647	0.00257885	0.00690507
RPL13AP17	0.295297	3.95594	2.45562e-06	1.24253e-05
NAP1L3	0.295164	4.26896	7.51787e-10	7.32648e-09
LRRIQ1	0.295067	4.19754	0.0198566	0.0415312
USP28	0.295006	7.074	6.98879e-12	1.00061e-10
CEACAM8	0.295	4.41782	0.00309622	0.00811585
TRBV19	0.294963	3.53631	2.59647e-05	0.000107744
SNORD116-26	0.294779	7.01423	0.00287781	0.00761045
PRR5L	0.294484	6.78708	4.2322e-07	2.49814e-06
ARHGAP25	0.294194	7.22788	9.46775e-07	5.2008e-06
RALGAPA1	0.294098	9.02979	3.00787e-07	1.82687e-06
GUSBP4	0.293985	7.73627	5.06458e-08	3.51702e-07
ARID2	0.29378	7.84133	4.90153e-17	2.05167e-15
CCL3	0.29372	6.55705	0.00302235	0.00795111
TTLL7	0.293657	7.2044	0.000362914	0.00118871
N4BP2L2	0.293642	9.07782	8.86755e-10	8.51967e-09
BDNF	0.2931	4.36141	6.39572e-08	4.36908e-07
PDE3A	0.293076	6.46302	0.000454263	0.0014567
PPP1R16B	0.292955	6.79993	2.99727e-08	2.17327e-07
ISYNA1	0.292909	6.1518	7.79628e-07	4.36658e-06
RASSF9	0.292887	5.01248	3.03321e-06	1.50933e-05
NIPSNAP3B	0.292886	4.43895	4.4115e-10	4.47621e-09
DZIP1	0.292788	5.32004	3.61184e-08	2.58654e-07
ULK2	0.292748	6.94851	6.83498e-09	5.57977e-08
NOX4	0.292652	5.55949	0.000202927	0.000702863
MAPRE2	0.29249	8.61225	1.14373e-06	6.17604e-06
SPAG16	0.292463	5.43562	4.67868e-08	3.26745e-07
CDK14	0.292419	7.75266	6.50106e-11	7.70706e-10
WDR19	0.292285	6.94212	1.37896e-05	6.04309e-05
PCDHB12	0.291932	5.07331	1.99907e-10	2.15129e-09
NFIB	0.29165	9.52096	1.76014e-09	1.60135e-08
PLA2G5	0.291487	6.60219	3.20348e-05	0.000130922
PHF1	0.291478	7.71131	9.88412e-11	1.12639e-09
KLF6	0.291416	9.69019	0.000102486	0.000378372
SPATA7	0.291403	5.27012	1.7054e-09	1.55946e-08
GALT	0.291397	7.23356	3.4254e-09	2.96843e-08
BPTF	0.291395	7.71357	1.29742e-18	7.82222e-17
TMEM154	0.291248	6.68498	2.11316e-05	8.92481e-05
CFAP57	0.291026	4.81178	0.0120655	0.0267872
ZSCAN26	0.290856	5.94788	1.95983e-07	1.22817e-06
BGN	0.290344	10.0408	0.000221838	0.000763004
TUBD1	0.290338	4.79823	2.36809e-08	1.75515e-07
FBXL2	0.289972	6.16864	5.18436e-10	5.19622e-09
MDH1B	0.289965	4.69122	0.0223961	0.0461813
ZNF337	0.289946	6.40225	1.42736e-07	9.18719e-07
HIVEP2	0.289932	8.01772	0.000106708	0.000392489
BICRAL	0.289877	7.3593	5.10246e-20	4.13971e-18
CFAP221	0.289857	6.85382	0.000133118	0.00048029
COX4I2	0.289724	6.22944	1.44053e-07	9.26289e-07
ZNF486	0.289697	6.61654	0.000294928	0.000986513
CGNL1	0.289606	6.93963	1.95863e-06	1.00874e-05
SLC25A45	0.28952	5.74808	2.78926e-13	5.24716e-12
IGF1R	0.289474	7.8937	1.73212e-11	2.30044e-10
ZFP37	0.289468	4.64553	1.007e-06	5.4964e-06
TCF7	0.289445	5.65251	7.05797e-10	6.91247e-09
TAAR3P	0.288921	4.06149	3.22057e-05	0.000131566
GNPTAB	0.288568	8.18207	4.75818e-08	3.31944e-07
CDC14B	0.288534	6.3984	2.07899e-10	2.23121e-09
IFT88	0.288512	5.66404	1.19765e-08	9.4033e-08
DNHD1	0.288425	5.94722	2.17381e-07	1.35067e-06
EVC	0.288419	6.86373	1.99883e-14	4.74211e-13
DOK6	0.288352	5.12196	3.72823e-07	2.21994e-06
DDX17	0.288316	10.4021	1.21771e-12	2.02422e-11
SLFN5	0.288235	9.68747	2.07892e-07	1.29416e-06
TCTN2	0.287985	6.74907	1.80635e-05	7.72498e-05
MYOM1	0.287957	4.80682	3.59351e-07	2.14815e-06
NEK5	0.287931	4.74455	0.00389185	0.00992212
PRDM5	0.28787	6.89319	3.24252e-09	2.8236e-08
COL4A5	0.28779	5.41834	8.58774e-11	9.93005e-10
TUG1	0.287696	10.1014	3.46489e-15	9.67568e-14
CCN3	0.287411	6.43421	0.00302081	0.00794813
SKIL	0.287258	7.35306	2.43802e-07	1.50534e-06
CDH13	0.287254	8.28131	0.0028956	0.00765134
HIST1H4C	0.287102	8.81288	0.00206288	0.00566983
HSD17B11	0.286923	8.90377	0.00013844	0.000497784
SECISBP2L	0.286839	9.06159	6.0219e-06	2.83143e-05
LOC728392	0.286688	5.66213	7.6945e-07	4.31693e-06
SYT11	0.28664	6.84594	0.000484677	0.00154671
SNORA46	0.286223	5.10483	0.00578945	0.0141384
SWT1	0.285731	5.78293	2.66752e-09	2.35303e-08
SBSPON	0.285628	6.592	0.000210635	0.000728392
MAL	0.285542	6.76472	1.41996e-05	6.20306e-05
SGK1	0.285403	7.92166	0.000162254	0.000574503
RFTN1	0.285344	8.19242	2.07958e-14	4.89832e-13
LINC00299	0.285338	3.7367	1.494e-09	1.37959e-08
ZNF274	0.285146	6.89728	1.54747e-12	2.50685e-11
NALCN	0.284964	4.32072	1.46487e-08	1.1321e-07
ANKRD10-IT1	0.284567	9.15363	0.00014137	0.000507208
COQ8A	0.284487	6.26811	1.8137e-13	3.55439e-12
IGHV1-45	0.283931	4.12005	0.00187322	0.00519562
IMMP2L	0.283874	4.5096	2.41315e-08	1.78452e-07
DNASE1	0.283819	4.73236	4.72708e-06	2.2609e-05
ALDH5A1	0.283803	5.71759	1.15219e-08	9.07167e-08
LOC100128398	0.283568	5.11635	3.48503e-07	2.08773e-06
STK17B	0.283193	9.56974	6.53775e-11	7.74589e-10
FOXP2	0.282936	5.46577	3.95267e-05	0.000158905
LINC00910	0.282922	5.29385	2.11511e-08	1.58312e-07
TSPYL5	0.282912	7.21937	0.000372048	0.0012162
ACTA2-AS1	0.28289	5.62795	1.90132e-09	1.7179e-08
PRELID2	0.282846	4.99605	2.75889e-12	4.27816e-11
SPRED1	0.282836	8.53699	4.22402e-06	2.04061e-05
SPAG17	0.282678	4.02564	0.0379743	0.0728555
ZNF638	0.282483	7.97984	1.28195e-06	6.84481e-06
VANGL2	0.282216	5.5105	9.5655e-07	5.24865e-06
OXER1	0.281891	6.18961	1.3969e-08	1.08254e-07
H1FX	0.28187	7.41485	6.84222e-09	5.58338e-08
TMEM200A	0.281775	5.4061	8.05728e-11	9.37163e-10
KIAA1109	0.281725	8.80973	1.6438e-10	1.79444e-09
LINC00649	0.281722	4.75833	8.38808e-08	5.63252e-07
HEY1	0.281399	6.99429	0.00570959	0.013971
HSPA1L	0.28125	4.39777	1.8144e-08	1.379e-07
TBC1D10C	0.281143	6.1773	2.05635e-07	1.28213e-06
TRHDE	0.281137	5.54492	0.00756404	0.0178486
MPPED2	0.28102	4.93515	6.88112e-05	0.000263216
ZNF721	0.280993	7.40818	0.000255286	0.000865662
BCAS1	0.280966	5.14117	9.50483e-05	0.000353095
HIST1H2BG	0.280826	6.77003	0.00944965	0.021615
SDC2	0.280732	7.86809	1.71392e-06	8.93204e-06
CLASP2	0.280724	8.18122	4.80855e-19	3.21358e-17
FAM30A	0.280603	4.30751	0.000535728	0.00169424
EFHB	0.28037	3.74245	0.000135019	0.000486459
SOST	0.280213	5.8564	0.00151376	0.00428547
SAXO2	0.280181	5.49842	0.0261985	0.0528718
CCDC122	0.280177	5.23613	4.07877e-07	2.41408e-06
SLC44A3	0.279779	6.55201	0.000108349	0.000398079
EOMES	0.279751	6.11576	1.84089e-07	1.15878e-06
CRIM1	0.279691	9.42871	1.84124e-06	9.5282e-06
ERBB4	0.279642	6.64425	5.58951e-05	0.000218212
TMEM37	0.279625	8.18435	7.42835e-05	0.000282395
ZFP36L2	0.279294	9.99144	2.0262e-08	1.52236e-07
DCDC1	0.279234	3.86853	0.0120649	0.0267872
LY6G5B	0.27921	8.07541	0.00617018	0.0149331
HPS5	0.279172	6.71437	2.79773e-10	2.93545e-09
FILIP1	0.279088	8.20155	8.67347e-07	4.81276e-06
RHOB	0.278857	8.52789	1.93686e-05	8.23487e-05
UGT1A10	0.278855	3.67719	0.00695618	0.0166171
IRF4	0.278808	6.22233	0.00291619	0.00770165
DOP1A	0.278745	7.1952	7.3208e-13	1.26716e-11
MIPOL1	0.278593	5.89509	4.55496e-08	3.19122e-07
IDS	0.27856	9.39617	2.94181e-09	2.57882e-08
FAT4	0.27841	7.97163	9.62184e-07	5.27809e-06
CLYBL	0.278142	5.75649	6.26632e-10	6.20495e-09
PRH1-PRR4	0.278109	6.46888	8.38587e-06	3.84125e-05
RPRD2	0.277904	8.13883	2.03755e-06	1.04583e-05
EZH1	0.277889	8.15725	8.20947e-12	1.15973e-10
LTC4S	0.277818	6.33962	4.01705e-10	4.09494e-09
GSTA1	0.277606	4.85199	0.0135911	0.029739
LIMD1	0.277583	7.73424	3.27343e-08	2.3579e-07
SPICE1	0.277508	6.66175	4.05399e-06	1.96647e-05
NHSL1	0.27748	7.69992	4.79429e-05	0.000189646
FMNL3	0.277247	7.59743	1.31792e-07	8.54132e-07
ANO9	0.277106	6.67298	3.6154e-06	1.76999e-05
ZNF630	0.277082	4.95927	9.25563e-05	0.000344487
DSERG1	0.27704	3.59037	2.75776e-06	1.38098e-05
PLCG2	0.277039	7.19752	6.00672e-07	3.43951e-06
MIRLET7G	0.276874	4.64125	0.000957807	0.00283922
TAS2R50	0.276394	5.49247	7.92648e-05	0.000299369
PIGA	0.276264	7.06168	0.00779948	0.0183252
PRPF3	0.276237	7.78042	3.67275e-07	2.18954e-06
TM4SF18	0.276168	6.10484	0.0246953	0.0502547
DCANP1	0.275925	4.81353	6.25082e-09	5.15627e-08
PHLDB1	0.275811	7.25186	9.51628e-06	4.30806e-05
ANXA3	0.275735	9.30253	0.000927693	0.00276067
ALMS1	0.27564	7.35912	1.93515e-09	1.74606e-08
CDKL2	0.275516	6.31901	0.000352711	0.00115837
INTS6L	0.27541	6.21613	4.98087e-10	5.00754e-09
IFT172	0.275396	6.02981	6.13141e-07	3.50379e-06
SOBP	0.275235	6.22641	5.33756e-13	9.47165e-12
NFIX	0.27503	7.5696	2.68084e-09	2.36372e-08
AIM2	0.275011	4.93853	0.00296712	0.00782462
ARL5B	0.275002	8.20204	0.0010977	0.0032099
PGGHG	0.274986	6.58505	0.00589824	0.0143614
SH2D3C	0.274913	8.28706	4.25971e-08	3.00251e-07
HSH2D	0.274448	5.75289	4.37702e-05	0.000174505
CA5B	0.274215	7.58078	1.14903e-05	5.11935e-05
PKIA	0.274193	5.15719	6.22587e-06	2.92176e-05
WBP2NL	0.273926	4.3466	1.0837e-07	7.12887e-07
SLC22A10	0.273854	3.77835	1.64401e-09	1.50892e-08
GRP	0.273595	5.71688	1.1212e-08	8.85599e-08
CYFIP2	0.273583	7.67807	4.51973e-07	2.65198e-06
CRBN	0.273485	7.90929	1.90657e-07	1.19745e-06
OR51A4	0.273352	3.87717	0.00252471	0.00677113
TPRG1	0.273315	5.5544	1.13281e-06	6.12208e-06
HSD17B3	0.272942	4.40317	1.53201e-08	1.18075e-07
ALDH1A1	0.272802	8.50153	8.95811e-05	0.000334487
SNORA55	0.272605	6.65967	0.00117478	0.003407
KCNRG	0.272592	6.23198	0.0173455	0.0369069
SPOCK2	0.272295	8.47577	0.000107235	0.000394356
ATG14	0.272231	6.36041	1.80205e-08	1.37065e-07
MIR142	0.272223	3.77149	0.000292466	0.00097861
KDM3A	0.272107	7.1864	6.18511e-06	2.9047e-05
OPTN	0.272097	7.56846	5.1351e-11	6.23091e-10
NRG1	0.271661	5.60842	3.18165e-06	1.57683e-05
NSD3	0.271589	7.92551	3.07912e-16	1.08401e-14
SCN4B	0.271542	5.9238	9.71181e-07	5.32448e-06
MBNL3	0.271385	7.60023	1.15768e-06	6.23936e-06
PCDHB13	0.271347	4.89009	0.00359447	0.00923683
HBP1	0.271254	7.57219	5.78054e-08	3.98195e-07
EPHA3	0.27124	4.95543	7.4082e-06	3.43169e-05
PRKG1	0.271142	7.70224	5.86537e-07	3.36346e-06
MPDZ	0.271137	7.6006	1.14338e-08	9.00881e-08
LOC100652766	0.27102	7.65653	6.52019e-05	0.000250576
YTHDC1	0.270968	8.15983	2.23189e-14	5.22586e-13
GUSBP2	0.270919	6.00224	0.00148608	0.00421615
HOXA6	0.270913	6.36349	8.96178e-07	4.95184e-06
LIMCH1	0.270892	9.17	1.87082e-07	1.17575e-06
TMEM98	0.270774	7.50156	1.13393e-11	1.56004e-10
HSF4	0.270612	6.05677	8.16387e-05	0.000307216
RP1	0.27057	4.60071	0.0245352	0.0499806
MARK1	0.270541	5.45076	2.31692e-06	1.17666e-05
ATXN7L1	0.270534	7.56617	6.81273e-10	6.70894e-09
GAB1	0.270457	8.89782	1.07396e-06	5.82639e-06
C11orf65	0.270427	4.45054	7.71778e-10	7.51388e-09
VXN	0.270359	5.46837	1.24395e-05	5.50618e-05
TRAF5	0.2703	5.87498	5.30928e-06	2.51919e-05
SAMD9	0.270247	7.19261	0.000895052	0.00267485
YPEL3	0.270189	7.88915	1.3421e-08	1.04501e-07
MBOAT2	0.270176	7.74208	2.65353e-05	0.000109881
ERCC6	0.26998	6.70586	6.22174e-10	6.1639e-09
APBB3	0.269757	7.24575	5.85522e-06	2.75832e-05
HCG8	0.269694	6.83282	0.00101901	0.00300088
ITIH2	0.269625	3.55503	4.87758e-09	4.1042e-08
ST6GALNAC6	0.269611	8.90729	1.47419e-15	4.43721e-14
OR6C3	0.269576	4.04525	0.00250435	0.00672844
CLEC6A	0.269341	4.15547	0.00233555	0.00632579
MRI1	0.269306	7.04673	2.58685e-07	1.58779e-06
LRRC37A4P	0.269235	6.11002	0.0123143	0.027272
OR8G1	0.268846	4.73376	0.00309804	0.00811883
TRAV10	0.268742	3.52815	0.00352872	0.00908564
ANGPT2	0.268659	5.60005	0.0019265	0.00533065
C21orf62-AS1	0.268421	4.43577	1.34818e-09	1.25961e-08
PPEF1	0.268228	3.26857	1.83946e-08	1.39642e-07
HYDIN	0.268221	5.69872	0.0357177	0.0689961
ULK4	0.268171	6.29921	1.10691e-05	4.94735e-05
TUFT1	0.268137	6.6577	0.00215947	0.00590074
PLEKHH1	0.26799	5.17255	2.80303e-10	2.93945e-09
PEAK1	0.267939	8.67383	5.5039e-11	6.62855e-10
CNTLN	0.267931	5.92973	2.6712e-06	1.34211e-05
STIM2	0.267646	7.15983	1.26897e-11	1.72894e-10
ZBTB44	0.267597	8.35935	6.10202e-15	1.61262e-13
GSAP	0.267597	8.2239	2.94417e-06	1.46799e-05
SMARCA1	0.267395	7.54328	1.66446e-08	1.27734e-07
SLA2	0.267294	6.02315	0.000133287	0.000480656
OR51B2	0.267258	4.63399	1.86326e-07	1.17212e-06
CD44	0.267235	10.4959	3.38428e-08	2.43241e-07
FAM111A	0.267206	7.75097	7.01688e-05	0.000267992
SPN	0.267192	6.61223	3.99944e-05	0.000160621
VPS13B	0.267144	7.95098	7.80903e-11	9.12056e-10
ZNF514	0.267112	5.71773	1.28523e-05	5.67361e-05
TTC14	0.266824	7.64624	0.00039008	0.00126905
LMOD1	0.266724	7.2951	0.00373016	0.00955189
TMED6	0.26668	4.27728	2.73858e-08	2.00047e-07
ANXA2R	0.266481	4.46951	6.16836e-11	7.33912e-10
CLEC1A	0.266339	7.32596	0.000544349	0.00171874
IGHV5-78	0.266233	6.10122	8.78226e-05	0.000328356
SCAMP1	0.26615	7.91117	1.98061e-08	1.49208e-07
FAM177B	0.266069	3.55357	1.52447e-05	6.61274e-05
FHL1	0.265492	9.59413	1.55293e-06	8.16428e-06
UNK	0.265074	6.87206	8.64095e-12	1.21596e-10
ZSCAN18	0.264949	6.42087	7.33119e-15	1.90177e-13
SLC46A3	0.264933	6.33361	1.31597e-05	5.79504e-05
CA8	0.2649	4.01644	9.12433e-07	5.02475e-06
MEIS2	0.264336	7.20836	2.07404e-06	1.06207e-05
ZNF160	0.264274	7.46631	4.3856e-05	0.000174812
NAAA	0.264125	7.49476	1.98916e-05	8.43722e-05
ARHGAP12	0.26402	7.97717	2.27442e-09	2.03081e-08
FAM81B	0.26385	4.81785	0.0459948	0.0858131
F10	0.26384	6.36307	2.09733e-11	2.74197e-10
SYCP2	0.263658	4.08016	2.59191e-07	1.5904e-06
DUSP6	0.26322	7.99148	0.000875794	0.00262366
DCAF16	0.263073	7.4665	1.76866e-12	2.82986e-11
WFS1	0.263035	7.49584	0.000640386	0.00198443
HLA-F-AS1	0.262933	7.07726	3.78846e-08	2.69929e-07
ZNRD1ASP	0.262807	8.08892	0.000622723	0.00193338
ZNF708	0.262691	6.4633	7.50364e-08	5.06451e-07
BTAF1	0.262687	8.00814	9.94883e-07	5.44534e-06
OR14I1	0.262626	4.77495	3.42405e-05	0.000139157
SPIN1	0.262595	8.82736	2.10555e-05	8.89835e-05
NKTR	0.262455	8.03731	0.000410381	0.00132808
ATF7IP2	0.262334	4.9879	1.96733e-05	8.35183e-05
SNORA14B	0.262321	5.45617	0.0261202	0.0527624
SH3RF1	0.262082	7.74856	2.22664e-09	1.98995e-08
RAMP3	0.262082	7.99322	0.00251554	0.00675205
FLT3LG	0.262024	7.2293	1.69169e-08	1.29672e-07
HLA-F	0.261872	8.72076	8.22582e-05	0.00030937
CAP2	0.261799	6.36389	0.000228783	0.000784701
GALNT5	0.261483	7.24897	0.00694925	0.0166026
KLHL24	0.261458	8.40214	0.000603583	0.00188306
ROBO1	0.261433	7.50049	6.45266e-08	4.40094e-07
AFAP1L2	0.261265	4.95107	5.20195e-09	4.35669e-08
AK9	0.261091	4.84239	3.2633e-07	1.96626e-06
BCO2	0.261071	5.31386	2.30294e-08	1.71201e-07
NPAT	0.260671	7.56016	3.35628e-11	4.23347e-10
KCNJ16	0.260628	4.7962	0.000309623	0.00102973
ZNF585A	0.26061	5.97229	7.72307e-06	3.56165e-05
LANCL1	0.260453	7.68812	6.1595e-08	4.22087e-07
AAMDC	0.260441	6.73533	1.14388e-05	5.09985e-05
MAOB	0.260312	6.8345	0.000146857	0.000525176
C16orf54	0.260199	6.22748	6.81955e-10	6.71209e-09
OR52B4	0.260163	4.62656	9.7449e-06	4.40644e-05
OR4C13	0.260148	4.5114	0.000446332	0.00143336
LOC100506730	0.260011	5.7633	5.16763e-07	2.99999e-06
CLEC9A	0.259979	3.90248	8.62706e-09	6.93931e-08
CDK15	0.259969	4.95815	0.000705827	0.00216144
KLRC3	0.25978	4.21566	0.00423214	0.0106792
EML5	0.259738	4.61066	1.06022e-12	1.78195e-11
FSIP2	0.259668	3.32557	4.2771e-06	2.0627e-05
EPN2	0.259655	7.41758	2.63975e-11	3.38599e-10
SRGAP3	0.259337	5.52055	1.75858e-05	7.54687e-05
CD244	0.259078	5.45849	0.00329121	0.00855117
SNORD68	0.259057	11.1602	0.00396694	0.0100849
CTNND1	0.258869	9.60886	3.57001e-12	5.40575e-11
ATXN3	0.258869	7.85744	5.80072e-06	2.73526e-05
PPP2R5A	0.258697	8.26062	0.000637825	0.00197716
NOTCH3	0.258607	7.83643	1.4181e-06	7.49763e-06
PPIL6	0.258559	5.9343	0.0374441	0.0719785
MIR24-1	0.258552	2.83202	1.67472e-09	1.53283e-08
PLXNC1	0.258534	7.67575	7.8769e-05	0.000297782
ZNF302	0.25828	7.82427	8.23943e-06	3.78032e-05
FANCL	0.257935	6.1517	4.036e-08	2.86222e-07
ZNF415	0.257707	5.35982	0.00420686	0.0106271
CD163L1	0.257649	6.11198	0.000161533	0.000572157
TAPT1	0.257621	7.05552	1.63903e-05	7.06768e-05
TAF1B	0.257596	6.16146	2.14574e-06	1.09651e-05
PSORS1C3	0.257487	4.20018	0.00229627	0.00622709
GFRA3	0.257423	4.06749	7.19618e-07	4.05698e-06
SFRP5	0.257304	6.11325	0.00785679	0.0184445
SIGLEC12	0.257123	5.36416	0.00224989	0.00612323
CD40	0.257121	6.80029	2.82192e-08	2.05444e-07
RNF165	0.256961	4.81647	1.74751e-10	1.89714e-09
IQCG	0.256922	6.27147	0.000395962	0.00128606
DENND1B	0.256901	6.89903	2.2794e-09	2.03433e-08
PAWR	0.256885	7.32066	7.11363e-05	0.000271372
PRKACB	0.25683	7.1514	0.000107608	0.000395578
BBS1	0.256818	7.4677	1.00526e-11	1.40057e-10
MAP3K1	0.256813	8.31118	1.14375e-08	9.00881e-08
LMBR1L	0.256805	7.21977	2.99489e-07	1.81955e-06
C1QTNF3	0.256726	3.67833	2.04637e-08	1.53575e-07
ADAMTS17	0.256656	5.72313	3.05639e-10	3.18482e-09
ZNF462	0.256656	8.2824	4.52834e-07	2.65545e-06
BICD1	0.256443	7.01532	1.74447e-08	1.332e-07
TCTN1	0.256402	6.7258	2.35846e-07	1.45896e-06
CDNF	0.256217	4.75988	3.71591e-09	3.19351e-08
ADAM20	0.256193	5.62112	4.37174e-06	2.10525e-05
TMEM229B	0.256162	4.36091	0.00394429	0.0100389
RANBP10	0.256127	7.39344	4.40943e-13	7.98272e-12
GPC6	0.255916	6.35063	0.0030605	0.00804289
BBX	0.255824	8.23301	3.88061e-10	3.97434e-09
FOXA2	0.255692	6.80264	0.000274878	0.000924308
NEK11	0.255676	5.25333	9.61699e-05	0.000356657
SLC9B1	0.255554	3.43517	9.96129e-10	9.49646e-09
INO80D	0.255336	8.27407	1.52734e-09	1.40708e-08
TSPEAR-AS2	0.255283	5.02931	1.50595e-06	7.93209e-06
CCDC159	0.25527	5.93825	1.79914e-07	1.13613e-06
NFE2L3	0.255093	6.47812	0.000894571	0.00267417
ARAP3	0.255084	7.18524	3.20182e-06	1.58603e-05
EML1	0.255006	7.00467	4.0795e-06	1.97756e-05
SNX29P2	0.255003	6.14672	0.00711027	0.0169421
TP53BP1	0.254861	6.69352	1.33947e-13	2.68098e-12
MIR218-1	0.25486	6.95455	0.0171698	0.0365829
UBQLN3	0.254793	4.49232	3.83938e-08	2.73162e-07
ZNF540	0.254784	3.72596	1.48082e-05	6.44042e-05
CDH8	0.254612	4.28971	1.65169e-05	7.11449e-05
FREM2	0.254477	6.62155	0.00080541	0.00243351
SPATA6L	0.254404	6.1903	0.000737531	0.00224736
UGT1A4	0.254244	6.24284	1.03003e-05	4.63629e-05
LOC100652807	0.254187	5.45765	3.2169e-06	1.5905e-05
ZIK1	0.254065	5.75374	1.53554e-12	2.48957e-11
BBS2	0.253992	6.95855	3.51162e-09	3.03382e-08
SUN1	0.253929	8.0883	6.06271e-08	4.15889e-07
RNF38	0.253907	8.7791	3.25909e-08	2.34843e-07
TTYH2	0.253907	6.55531	3.31584e-08	2.38583e-07
ZNF138	0.253726	6.12901	7.9767e-05	0.000301035
IRX3	0.253709	7.76167	0.00226306	0.00614963
SFTPC	0.253494	12.0781	1.79765e-08	1.36789e-07
SPDYE7P	0.253485	5.24281	0.00144339	0.00410865
BLNK	0.25345	6.19233	0.00172609	0.00482283
CCNL2	0.253386	7.58485	0.000992347	0.00293139
ACAP1	0.253341	6.87185	0.0022552	0.00613404
OPN3	0.25319	6.84678	3.092e-05	0.000126707
LGR4	0.253155	6.41458	9.0138e-07	4.975e-06
LOC149373	0.253075	5.41061	0.000354952	0.00116495
ILDR2	0.253038	4.59499	1.4881e-07	9.547e-07
HSD17B13	0.253037	4.84459	0.0208856	0.0434116
DNAJC18	0.25285	6.7569	9.94217e-09	7.90681e-08
SNORA22	0.252752	9.3447	2.46652e-05	0.000102872
IQUB	0.252695	3.69022	0.0205917	0.0428732
BTBD9	0.25267	7.02467	2.28529e-13	4.36998e-12
NMRK1	0.252641	4.9113	0.00219817	0.00599736
TEK	0.252641	8.94946	0.000445614	0.00143153
SEL1L3	0.25264	8.58456	1.02067e-05	4.59627e-05
KLHDC2	0.25247	7.45539	2.43055e-05	0.000101479
LTK	0.252398	5.25984	0.00198804	0.00548477
MYOM2	0.252181	4.23015	6.40287e-08	4.37245e-07
OXR1	0.251936	6.61193	1.71663e-07	1.08856e-06
TTC6	0.251828	4.57069	1.65959e-05	7.14699e-05
GLS	0.251765	8.28334	8.50225e-08	5.69949e-07
CASP1	0.251761	6.0993	0.0134203	0.0294143
INTS3	0.25159	8.54273	4.37028e-07	2.57502e-06
LOC100288160	0.251565	5.56468	3.64071e-05	0.000147385
TMEM14EP	0.251372	5.73539	2.14824e-07	1.33562e-06
ZRANB2	0.251275	8.43796	2.92162e-06	1.45785e-05
C2orf73	0.251237	3.99243	0.000671268	0.0020675
NIBAN3	0.251046	5.01274	9.14577e-06	4.15554e-05
PBX1	0.251024	8.81775	2.41814e-07	1.49353e-06
PAPLN	0.251019	6.37744	8.34162e-06	3.82276e-05
TIA1	0.250819	8.94282	0.000586189	0.00183411
OR2M5	0.250634	4.85162	0.000733216	0.00223559
APOBEC3C	0.250577	7.49021	0.000267234	0.000901526
TSC22D2	0.250484	8.34031	6.64361e-06	3.10229e-05
SHROOM4	0.25029	7.28802	3.57079e-07	2.13586e-06
BDKRB2	0.249979	5.65055	1.43537e-06	7.58059e-06
ZBTB4	0.249954	7.82757	1.17154e-09	1.1061e-08
CFAP53	0.249786	4.63405	0.000824689	0.00248377
PCM1	0.249729	8.30551	6.1371e-10	6.0831e-09
SNORA16B	0.249586	4.39761	0.00479577	0.0119375
PCNX2	0.249541	6.1475	1.47948e-07	9.49479e-07
ZNF683	0.249507	5.84069	6.45352e-08	4.40094e-07
PCGF3	0.249432	7.45222	1.34168e-08	1.04501e-07
SNORD116-4	0.249209	7.99504	0.000198558	0.000688821
APOBEC3F	0.249125	6.02835	8.56409e-06	3.9147e-05
SNORA50A	0.249112	9.16581	3.24658e-05	0.000132598
ARID4B	0.249095	7.00385	3.12149e-07	1.88658e-06
CD37	0.249086	8.74304	2.99513e-05	0.000122916
SLC44A5	0.249003	4.01109	0.00010086	0.000372508
HPSE2	0.248532	5.5448	2.58083e-06	1.30097e-05
ADAMTS5	0.248526	5.14005	0.00018725	0.00065385
ZNF862	0.248502	6.46355	4.324e-09	3.66342e-08
ZNF84	0.248423	6.42874	1.37861e-06	7.31412e-06
ZNF711	0.248356	3.77878	7.38687e-09	5.99556e-08
TRIM52	0.248009	6.45986	0.000156972	0.00055765
KLHL41	0.248004	3.86334	6.83452e-09	5.57977e-08
CCSER1	0.24779	4.66423	0.000274388	0.00092282
LGALS4	0.247627	5.97287	6.73846e-08	4.57941e-07
MOCS1	0.247417	7.20922	2.85182e-08	2.07467e-07
ARMH4	0.247414	4.01741	7.4697e-09	6.0603e-08
CFAP161	0.247332	5.31016	0.00227445	0.0061764
PIGZ	0.247203	5.85567	2.51195e-12	3.92729e-11
OR4K5	0.247096	4.2006	0.00018749	0.000654457
SNCAIP	0.247073	5.35155	2.40224e-06	1.21749e-05
CCDC39	0.24676	3.96135	0.0112846	0.0252527
ZNF571	0.246717	6.21913	3.68255e-06	1.79974e-05
CAVIN2	0.246611	8.4853	0.000125848	0.000456503
PCDHGC5	0.24644	5.01573	1.0144e-06	5.53219e-06
GADD45B	0.246438	8.11124	0.0201141	0.0419941
JMJD1C	0.246226	8.55505	8.78881e-07	4.8658e-06
ZNF780B	0.24617	6.79341	0.00181184	0.00503957
PIK3R6	0.246047	5.25857	3.59296e-06	1.76076e-05
RBBP6	0.245866	7.91648	4.07543e-12	6.11935e-11
OR52N5	0.245611	4.39124	0.0486582	0.090041
OSR2	0.245373	5.37442	0.000110412	0.00040513
LOC401261	0.245203	6.11279	0.00024184	0.000824038
FOLR1	0.245186	9.59635	0.00030772	0.00102426
ZEB1	0.245175	8.78011	0.000176196	0.000618426
TSPYL4	0.245037	6.13873	6.89906e-10	6.77365e-09
PHC3	0.244964	9.786	2.86427e-17	1.26329e-15
ARHGDIB	0.244825	9.41658	1.57464e-05	6.80764e-05
PQLC3	0.244716	7.88762	1.81442e-08	1.379e-07
CYP2C18	0.244653	4.47197	1.40986e-07	9.08641e-07
GUSBP5	0.244642	6.10867	8.72681e-07	4.83827e-06
FNBP4	0.244605	8.71402	3.95176e-06	1.92036e-05
ATP6V1B1	0.244561	5.80789	6.52401e-06	3.05006e-05
BRS3	0.244513	3.10899	0.00878032	0.0203007
OR7E24	0.244461	3.941	3.03229e-06	1.50925e-05
BNIP3L	0.24436	10.2467	1.80845e-06	9.37265e-06
CCDC66	0.244191	5.40006	7.57767e-06	3.50114e-05
WDPCP	0.244125	6.61531	1.89107e-09	1.71021e-08
RPP38-DT	0.244104	5.12524	3.34677e-07	2.0147e-06
PRIM1	0.244103	5.58486	3.21731e-06	1.5905e-05
GBP2	0.244063	7.57526	0.000526072	0.00166771
PP12719	0.244008	5.89124	0.00789241	0.0185193
DNAH9	0.243855	5.23148	0.0315012	0.0619312
LOC101060117	0.243815	4.55605	0.000309848	0.0010303
SEMA4F	0.243371	5.43199	1.20631e-10	1.35358e-09
KCNA5	0.243325	5.32089	1.92353e-05	8.18351e-05
ZNF506	0.243159	7.54109	0.000186346	0.000650809
TCF7L2	0.243127	7.97995	8.21812e-09	6.6266e-08
RPL13A	0.243108	3.92127	0.013213	0.0290277
NXPH3	0.242848	6.19864	6.50412e-09	5.33842e-08
STK4	0.242847	8.62127	1.37165e-09	1.27738e-08
ICA1L	0.24272	4.90433	1.46685e-05	6.38244e-05
CYP4F12	0.242445	3.9327	3.49598e-05	0.000141963
CRIPAK	0.242399	6.44793	0.000187549	0.000654545
MSH2	0.242258	5.22758	2.47537e-06	1.25198e-05
FAM118A	0.242221	6.4854	4.10601e-07	2.42802e-06
OR51S1	0.241886	5.35199	8.88466e-07	4.91335e-06
PKD2	0.241426	7.57703	1.87573e-08	1.42176e-07
LSAMP	0.241425	7.12738	2.79975e-06	1.40094e-05
ZNF260	0.241377	6.56187	0.0014053	0.00401063
PLD4	0.241352	5.94755	5.04514e-08	3.50475e-07
HAAO	0.241344	6.57467	1.73341e-10	1.88496e-09
ZNF626	0.241301	8.14799	8.37653e-05	0.000314439
SGCD	0.24121	5.50374	0.000562389	0.00176778
SP140L	0.2412	7.07708	4.00608e-05	0.000160855
ESRRG	0.24111	3.55871	1.04886e-08	8.30784e-08
ARMC4	0.241074	4.24072	0.0106458	0.0239942
ZMYND10	0.241045	6.05568	0.0193128	0.0405746
BMF	0.241012	6.11875	7.98653e-06	3.67369e-05
SP110	0.240961	7.3614	3.71053e-07	2.21073e-06
TRMT44	0.240835	7.10538	1.84016e-06	9.5282e-06
LIPA	0.24078	9.40813	0.0178235	0.0378042
HIST1H1C	0.240141	7.58647	0.00572512	0.0140038
FRMD6	0.239995	5.72611	2.13766e-05	9.01474e-05
RORA	0.239766	8.04816	1.29608e-08	1.01157e-07
CPVL	0.239678	6.38081	0.00127964	0.00368185
ZDHHC15	0.239629	5.36016	1.30715e-05	5.76007e-05
MARF1	0.2396	8.52648	7.17362e-11	8.43315e-10
TRDMT1	0.239569	5.74385	1.04442e-11	1.44903e-10
USP20	0.239557	5.71316	4.91851e-11	5.99681e-10
TMC8	0.239453	6.67211	2.38157e-05	9.96447e-05
DCP1B	0.239436	6.55647	6.12739e-05	0.000237145
RPL9	0.23928	8.11778	0.00065565	0.00202572
GDPD5	0.23886	6.42231	4.93982e-05	0.000194777
FAM228A	0.238783	3.35361	1.56842e-10	1.71785e-09
OR4N2	0.238606	3.44804	7.05353e-05	0.000269288
NWD1	0.238599	4.71596	0.000211117	0.00072982
IFIH1	0.238531	6.21944	0.00229479	0.00622464
STXBP1	0.238286	9.17006	0.000102878	0.000379537
ANKRD12	0.23819	8.81838	1.70765e-09	1.56079e-08
KIAA1211	0.238081	6.04011	9.43136e-11	1.07916e-09
CDH19	0.237976	4.66254	3.48972e-05	0.000141739
TNRC6B	0.23789	7.72581	6.74639e-16	2.20939e-14
NEK1	0.237859	6.42461	1.96221e-08	1.47878e-07
RUBCNL	0.237735	5.26369	0.00432441	0.0108915
WSB1	0.237678	10.3938	2.79637e-07	1.70524e-06
HIST1H1E	0.237632	11.2639	0.000829773	0.00249832
SOCS2	0.237535	7.35972	0.000614791	0.00191237
DIP2A	0.237303	6.85517	6.27956e-07	3.58326e-06
P2RY8	0.237243	5.89367	0.00863118	0.0199934
PACRG	0.237004	5.36718	0.0194977	0.0409063
TRIB2	0.236691	7.44029	2.0263e-09	1.82081e-08
SFR1	0.23655	5.61671	0.0075616	0.017845
FOXS1	0.236536	5.90823	1.61883e-07	1.03152e-06
LYPLAL1	0.236531	4.80287	9.76189e-05	0.000361487
SIGIRR	0.236495	7.31677	5.67284e-08	3.91596e-07
LRCH3	0.236439	8.69387	2.07831e-13	4.00918e-12
ATRX	0.23642	7.24771	4.25293e-09	3.6063e-08
[truncated: 8,695 more rows]
